# Supplementary material for: Selfish Spermatogonial Selection: Evidence from an Immunohistochemical Screen in Testes of Elderly Men
Source: PubMed Central journal article supplement (PMC3412839; doi:10.1371/journal.pone.0042382), 2012-08-06

**Dataset S2. Illustration of the 84 microclones identified in samples 1-1 and 1-2.**

**A.** Tables displaying the antigenic profile of the microclone and cell counts for each positive section, using the same scheme as in legend to Figure 2. **B.** Panel of images displaying the staining of each microclone. Independently identified cellular clusters are tagged with a flag; absence of a flag indicates that no cluster is present (if allocated a score of 0 in the table above) or that clusters were identified in the *post hoc* analysis (if allocated a score of 0\* in the table above). Scale bars: 100  $\mu\text{m}$ .

# Clone no. 1-1\_C1

**A**

| Clone no. | Location | Slide 1  | Slide 2 | Slide 3 | Slide 4  | Slide 5  | Slide 6  | Slide 7 | Slide 8  | Slide 9 | Slide 10 | Slide 11 | Minimum number of cells |
|-----------|----------|----------|---------|---------|----------|----------|----------|---------|----------|---------|----------|----------|-------------------------|
|           |          | MAGEA4   | SSX     | Ki67    | FGFR3    | MAGEA4   | SAGE1    | OCT2    | MAGEA4   | n.s.    | missing  | MAGEA4   |                         |
| 1-1_C1    | Centre   | 1        | 0       | 0       | 1        | 1        | 0*       | 0       | 1        |         |          | NA       | 356                     |
|           |          | 38 cells |         |         | 30 cells | 62 cells | 30 cells |         | 22 cells | 40 µm   |          |          |                         |

**B**

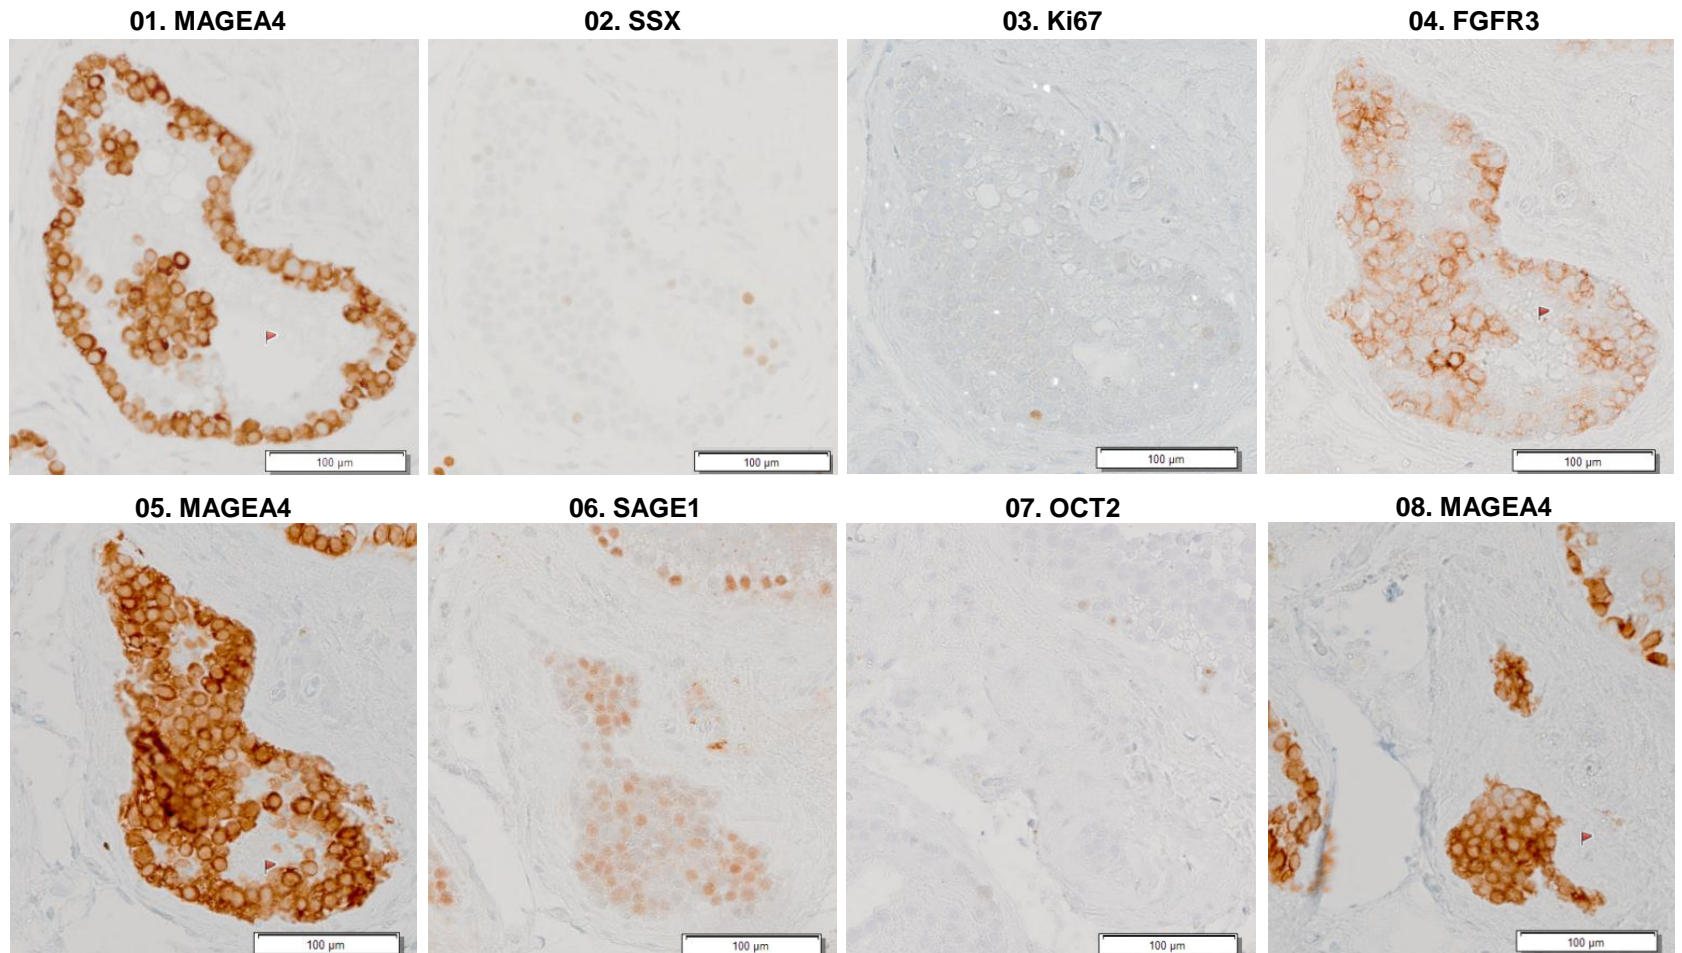

# Clone no. 1-1\_C2

**A**

| Clone no. | Location  | Slide 1  | Slide 2 | Slide 3 | Slide 4  | Slide 5  | Slide 6 | Slide 7 | Slide 8 | Minimum number of cells |
|-----------|-----------|----------|---------|---------|----------|----------|---------|---------|---------|-------------------------|
|           |           | MAGEA4   | SSX     | Ki67    | FGFR3    | MAGEA4   | SAGE1   | OCT2    | MAGEA4  |                         |
| 1-1_C2    | Periphery | 1        | 0       | 0       | 1        | 1        | 0       | 0       | 0*      | 287                     |
|           |           | 80 cells |         |         | 10 cells | 23 cells |         |         | 3 cells |                         |
| 40 μm     |           |          |         |         |          |          |         |         |         |                         |

**B**

**01. MAGEA4**

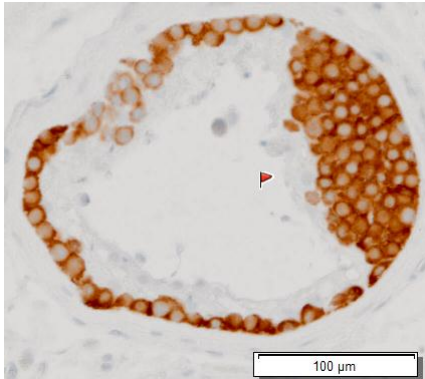

**02. SSX**

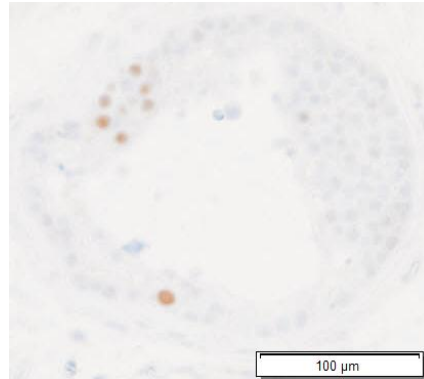

**03. Ki67**

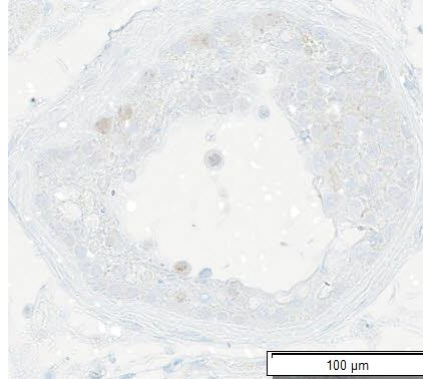

**04. FGFR3**

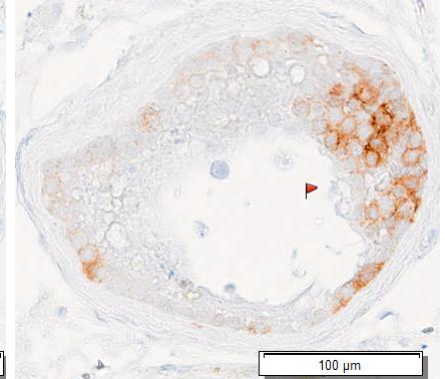

**05. MAGEA4**

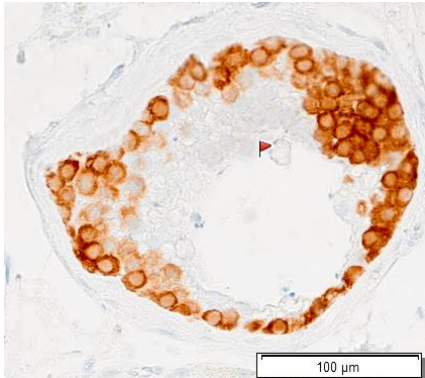

**06. SAGE1**

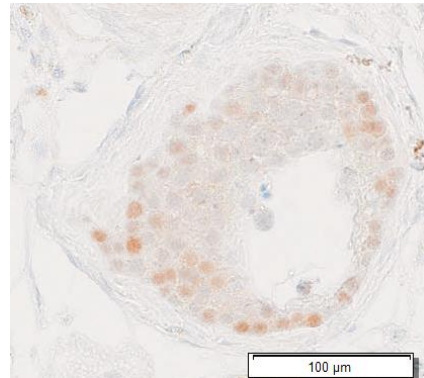

**07. OCT2**

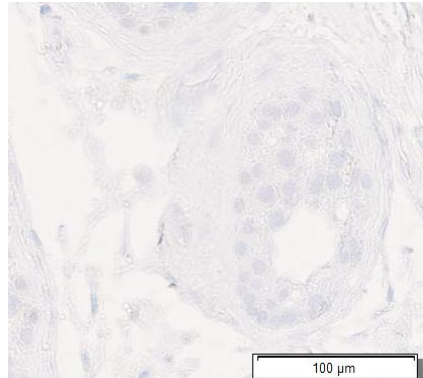

**08. MAGEA4**

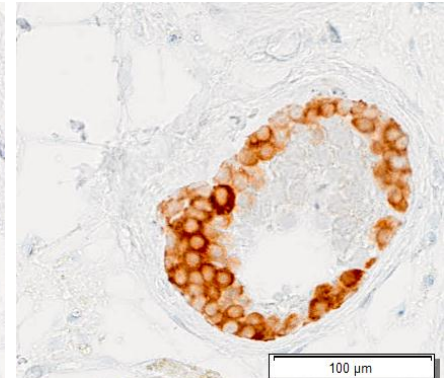

# Clone no. 1-1\_C3

**A**

| Clone no. | Location       | Slide 1 | Slide 2 | Slide 3 | Slide 4 | Slide 5 | Slide 6 | Slide 7 | Slide 8 | Minimum number of cells |
|-----------|----------------|---------|---------|---------|---------|---------|---------|---------|---------|-------------------------|
|           |                | MAGEA4  | SSX     | Ki67    | FGFR3   | MAGEA4  | SAGE1   | OCT2    | MAGEA4  |                         |
| 1-1_C3    | Near Periphery | 1       | 0       | 0       | 0       | 1       | 0       | 0       | 0*      | 58                      |
|           |                | 9 cells |         |         |         | 9 cells |         |         | 2 cells |                         |
| 40 μm     |                |         |         |         |         |         |         |         |         |                         |

**B**

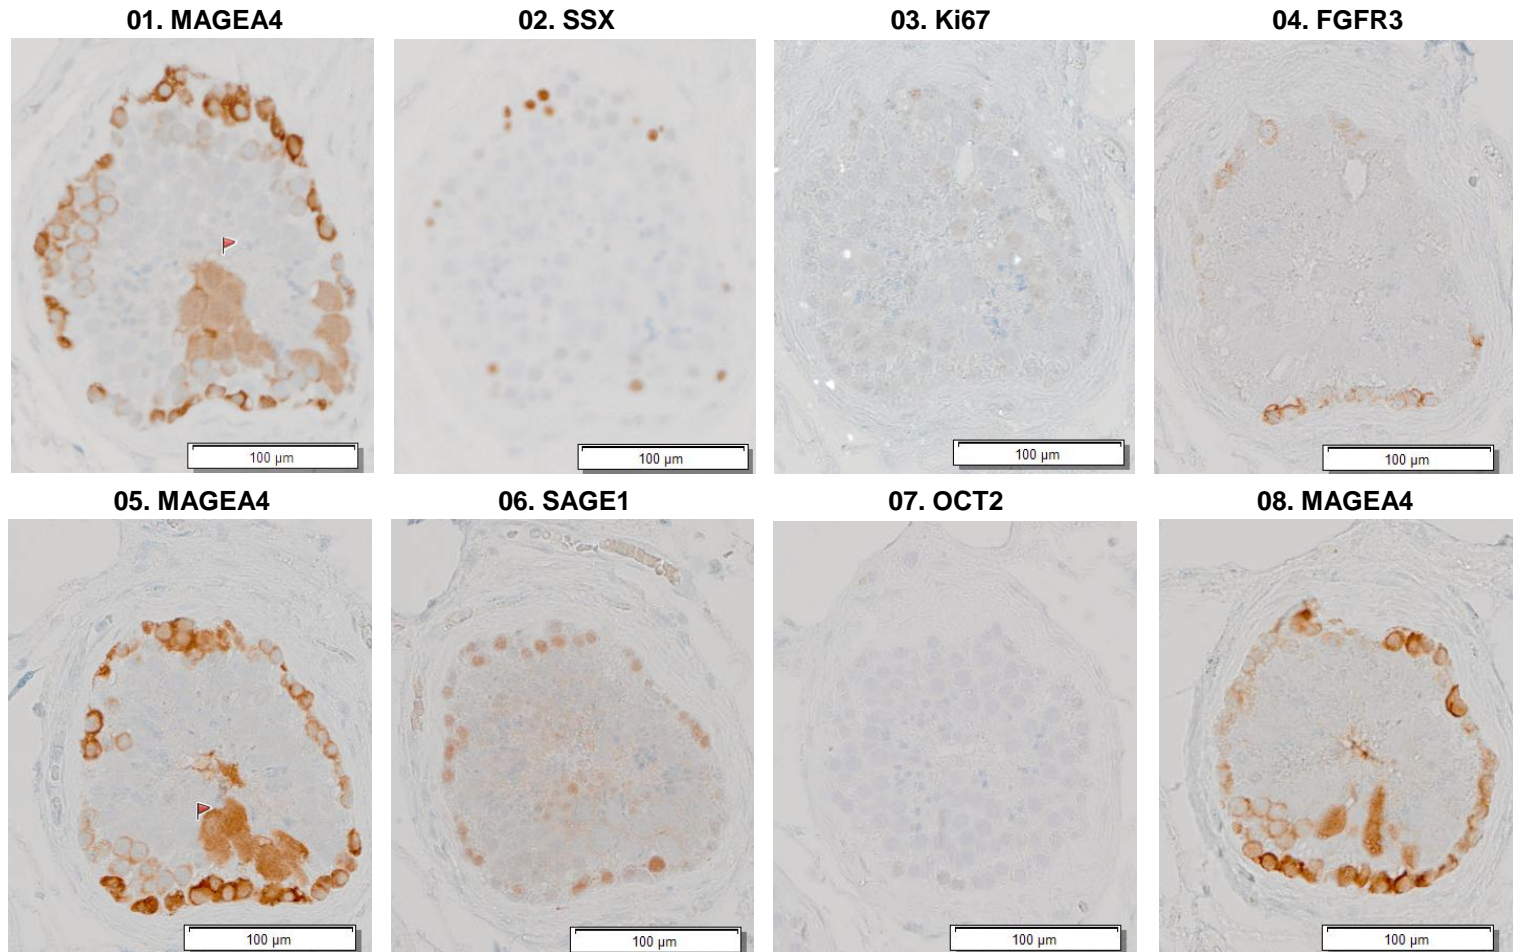

# Clone no. 1-1\_C4

**A**

| Clone no. | Location | Slide 1 | Slide 2 | Slide 3 | Slide 4 | Slide 5  | Slide 6  | Slide 7 | Slide 8 | Slide 9 | Slide 10 | Slide 11 | Minimum number of cells |
|-----------|----------|---------|---------|---------|---------|----------|----------|---------|---------|---------|----------|----------|-------------------------|
|           |          | MAGEA4  | SSX     | Ki67    | FGFR3   | MAGEA4   | SAGE1    | OCT2    | MAGEA4  | n.s.    | missing  | MAGEA4   |                         |
| 1-1_C4    | Centre   | 0*      | 1       | 0*      | 1       | 1        | 1        | 0       | 1       |         |          | 0        | 78                      |
|           |          | 6 cells | 3 cells | 2 cells | 5 cells | 14 cells | 12 cells |         | 7 cells |         |          |          |                         |
| 40 μm     |          |         |         |         |         |          |          |         |         |         |          |          |                         |

**B**

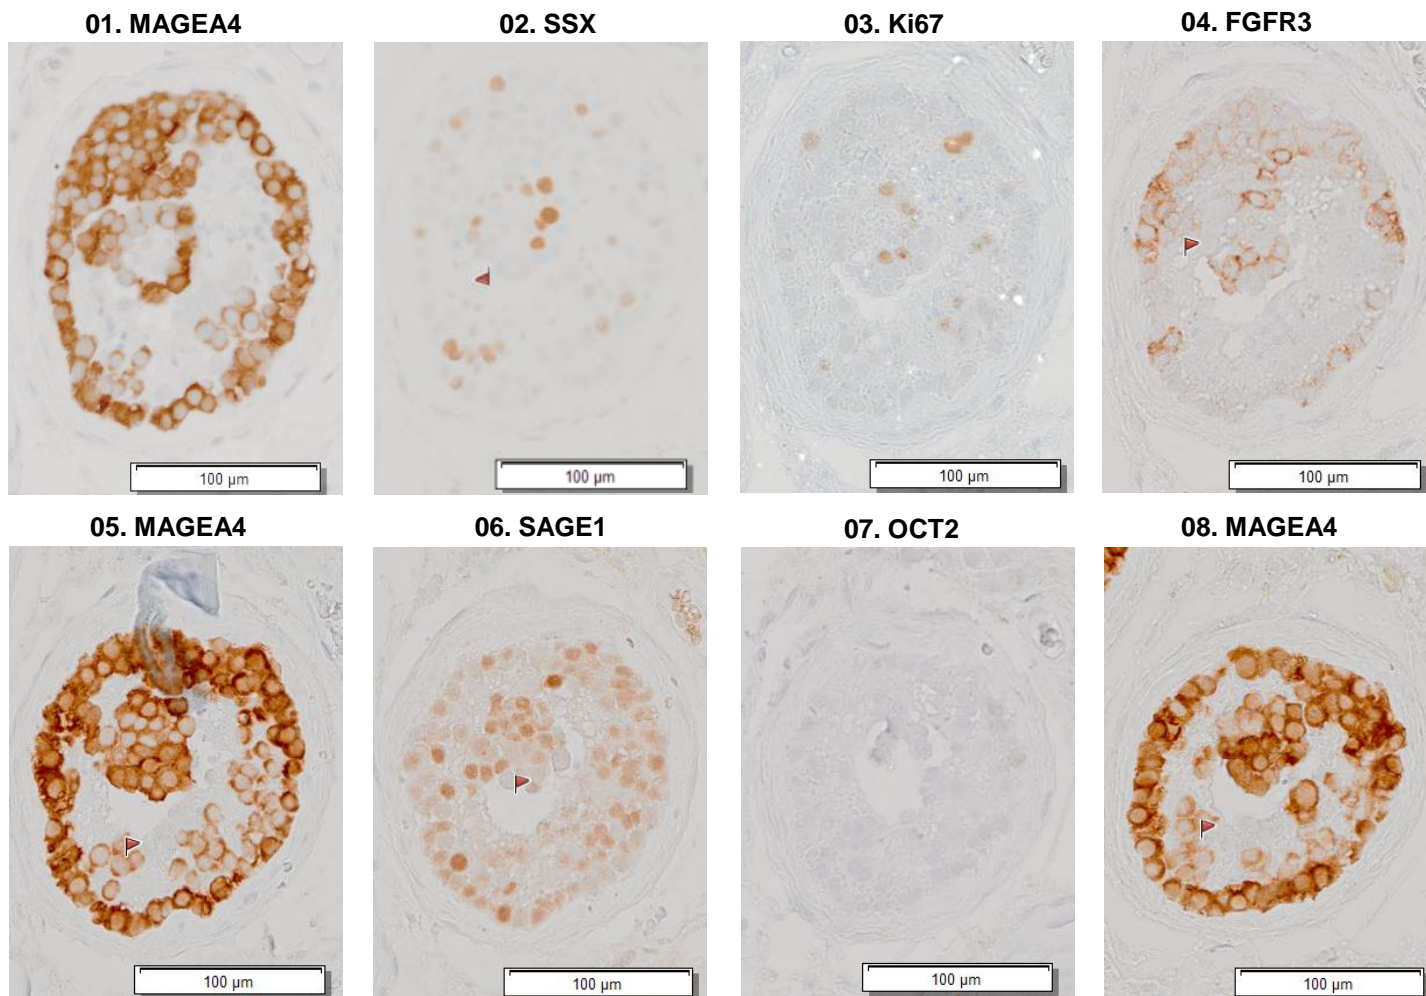

# Clone no. 1-1\_C5

**A**

| Clone no. | Location  | Slide 1 | Slide 2 | Slide 3 | Slide 4 | Slide 5  | Slide 6 | Slide 7 | Slide 8  | Slide 9 | Slide 10 | Slide 11 | Minimum number of cells |
|-----------|-----------|---------|---------|---------|---------|----------|---------|---------|----------|---------|----------|----------|-------------------------|
|           |           | MAGEA4  | SSX     | Ki67    | FGFR3   | MAGEA4   | SAGE1   | OCT2    | MAGEA4   | n.s.    | missing  | MAGEA4   |                         |
| 1-1_C5    | Periphery | NA      | 0       | 0       | 0       | 1        | 0*      | 0       | 1        |         |          | 1        | 120                     |
|           |           |         |         |         |         | 13 cells | 4 cells |         | 18 cells |         |          | 20 cells |                         |
| 35 µm     |           |         |         |         |         |          |         |         |          |         |          |          |                         |

**B**

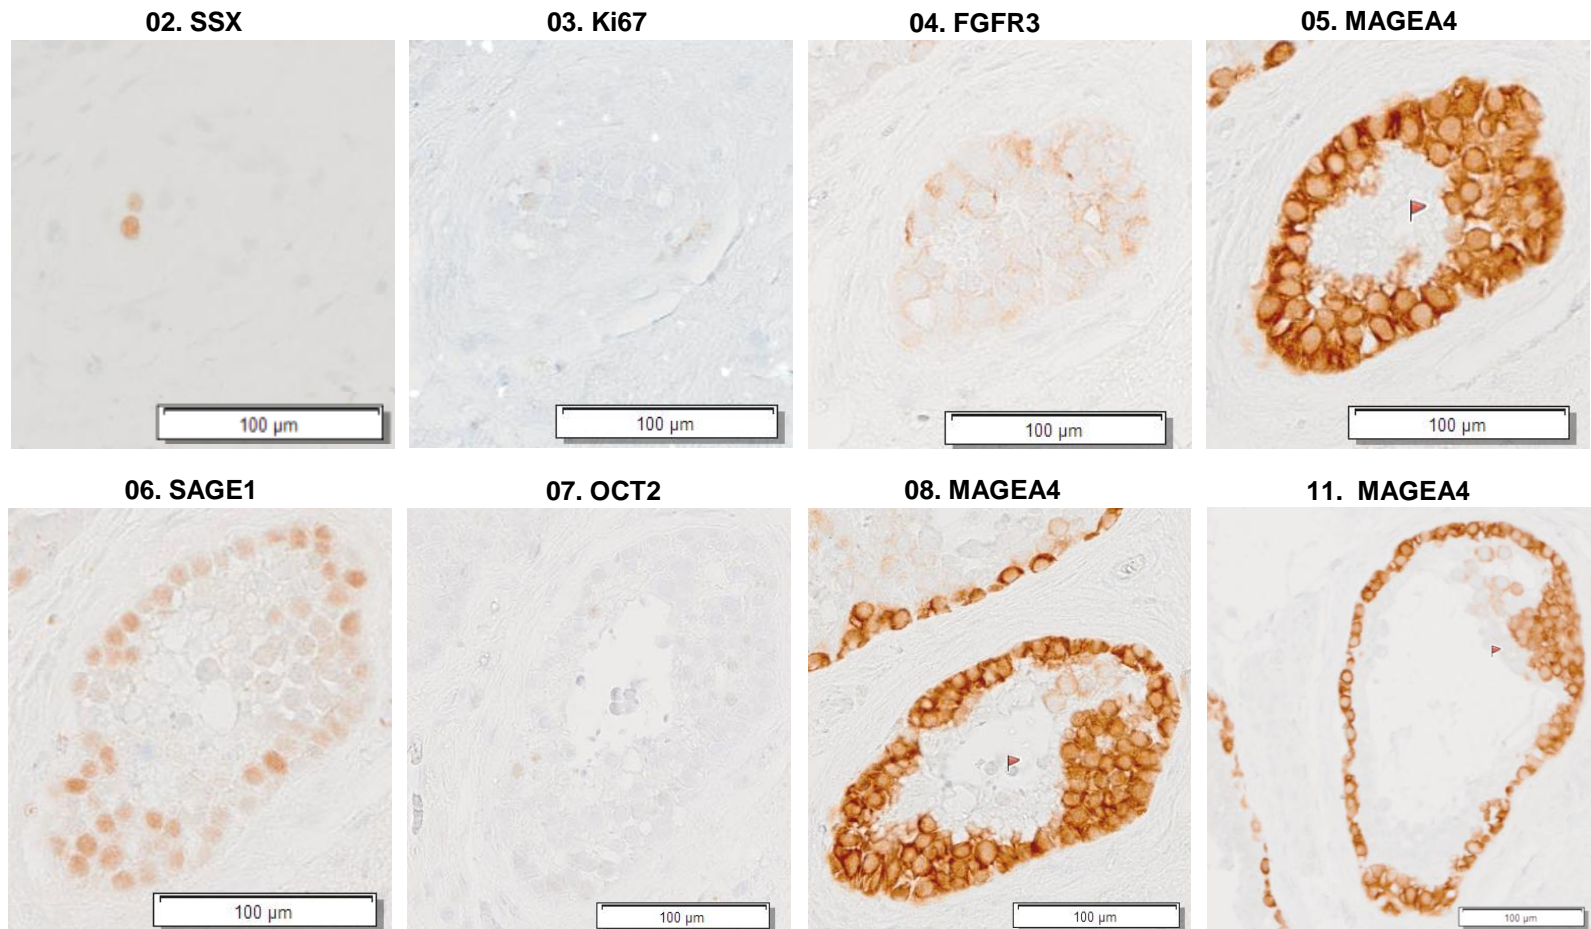

# Clone no. 1-1\_C6

**A**

| Clone no. | Location | Slide 1 | Slide 2 | Slide 3 | Slide 4 | Slide 5 | Slide 6 | Slide 7 | Slide 8 | Slide 9 | Slide 10 | Slide 11 | Minimum number of cells |
|-----------|----------|---------|---------|---------|---------|---------|---------|---------|---------|---------|----------|----------|-------------------------|
|           |          | MAGEA4  | SSX     | Ki67    | FGFR3   | MAGEA4  | SAGE1   | OCT2    | MAGEA4  | n.s.    | missing  | MAGEA4   |                         |
| 1-1_C6    | Centre   | 0*      | 0       | 0       | 0       | 1       | 1       | 0       | 1       |         |          | 0        | 40                      |
|           |          | 1 cell  |         |         |         | 9 cells | 3 cells |         | 3 cells |         |          |          |                         |
| 40 µm     |          |         |         |         |         |         |         |         |         |         |          |          |                         |

**B**

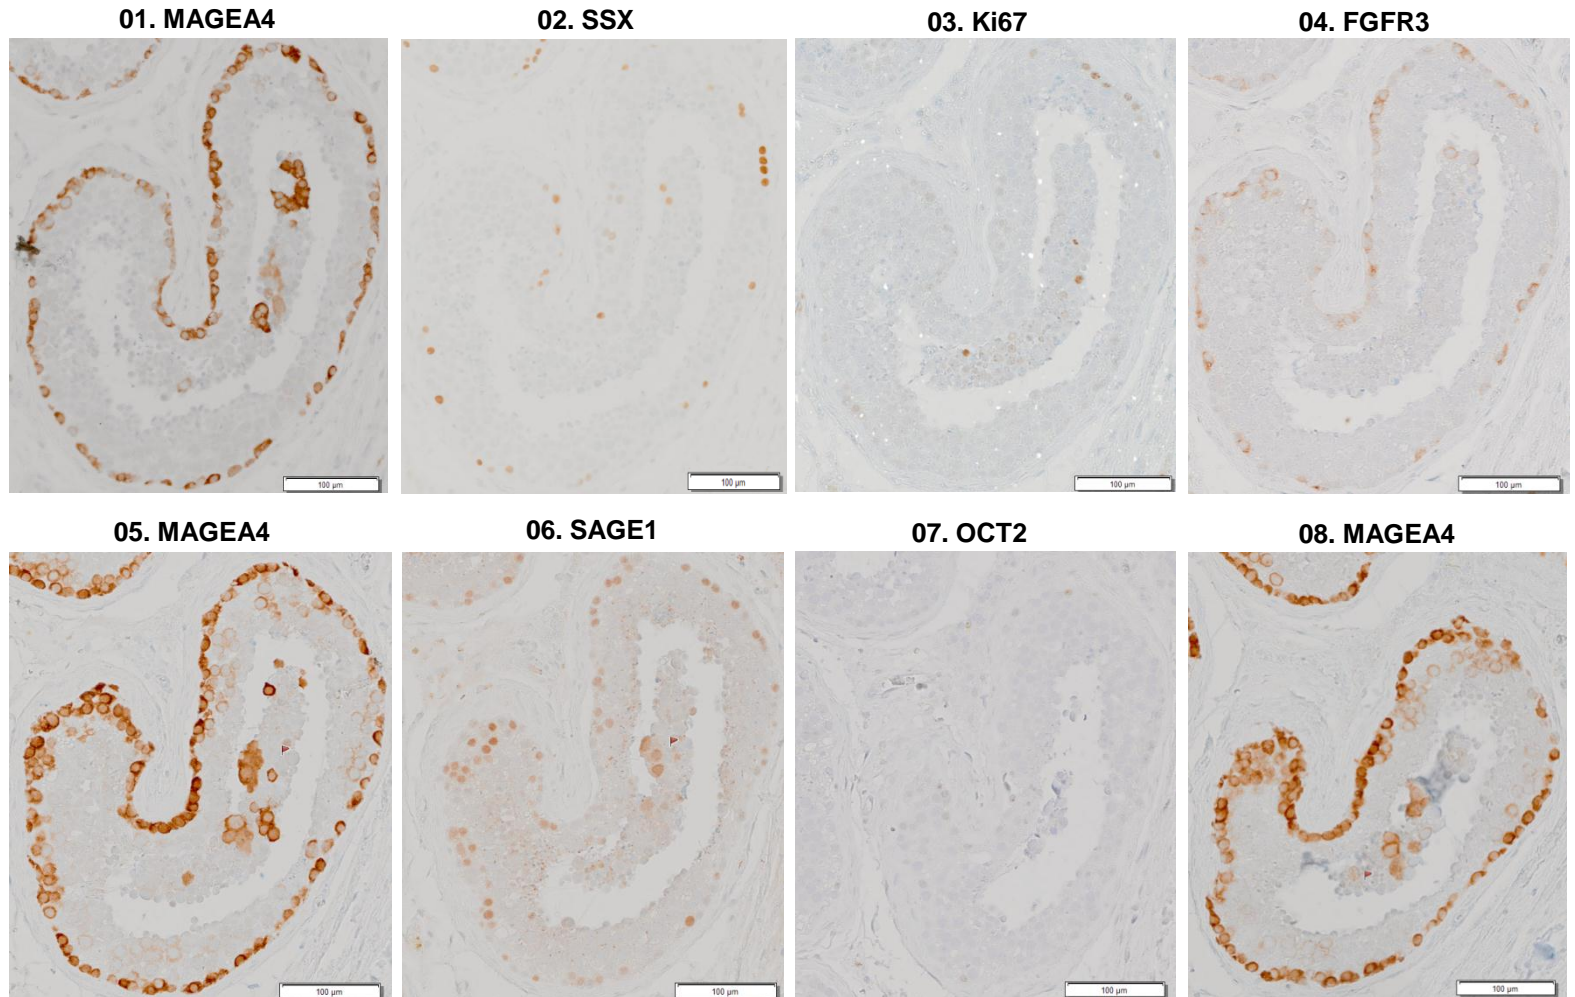

# Clone no. 1-1\_C7

**A**

| Clone no. | Location  | Slide 1 | Slide 2 | Slide 3  | Slide 4 | Slide 5 | Slide 6 | Slide 7 | Slide 8 | Slide 9 | Slide 10 | Slide 11 | Minimum number of cells |
|-----------|-----------|---------|---------|----------|---------|---------|---------|---------|---------|---------|----------|----------|-------------------------|
|           |           | MAGEA4  | SSX     | Ki67     | FGFR3   | MAGEA4  | SAGE1   | OCT2    | MAGEA4  | n.s.    | missing  | MAGEA4   |                         |
| 1-1_C7    | Periphery | 0       | 0       | 0        | 0       | 1       | 0       | 0       | 1       |         |          | 0        | 36                      |
|           |           | 7 cells |         | 11 cells |         | 20µm    |         |         |         |         |          |          |                         |

**B**

**01. MAGEA4**

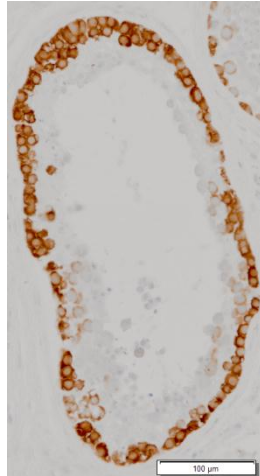

**02. SSX**

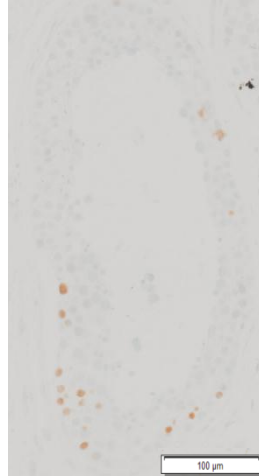

**03. Ki67**

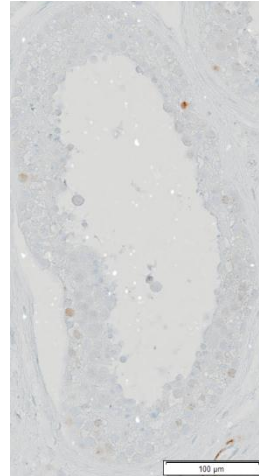

**04. FGFR3**

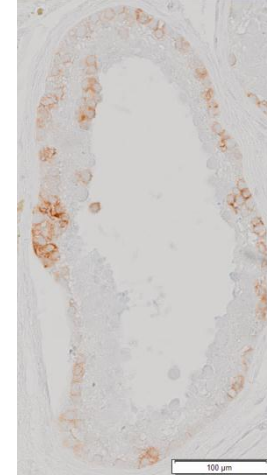

**05. MAGEA4**

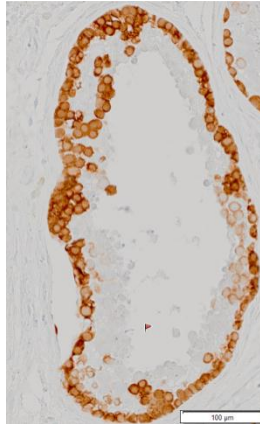

**06. SAGE1**

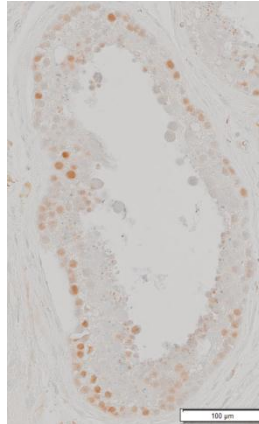

**07. OCT2**

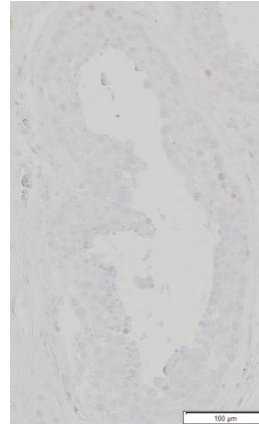

**08. MAGEA4**

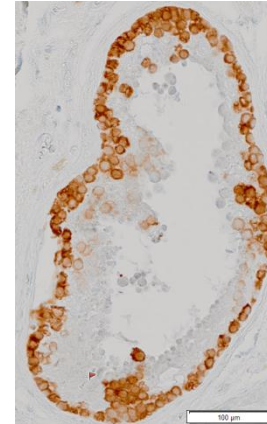





# Clone no. 1-1\_C9

**A**

| Clone no. | Location       | Slide 1 | Slide 2 | Slide 3 | Slide 4 | Slide 5 | Slide 6 | Slide 7 | Slide 8 | Slide 9 | Slide 10 | Slide 11 | Minimum number of cells |
|-----------|----------------|---------|---------|---------|---------|---------|---------|---------|---------|---------|----------|----------|-------------------------|
|           |                | MAGEA4  | SSX     | Ki67    | FGFR3   | MAGEA4  | SAGE1   | OCT2    | MAGEA4  | n.s.    | missing  | MAGEA4   |                         |
| 1-1_C9    | Near Periphery | 0       | 0       | 0       | 0       | 1       | 0*      | 0       | 1       |         |          | 0        | 24                      |
|           |                |         |         |         |         | 7 cells | 3 cells |         | 5 cells |         |          |          |                         |
|           |                | 20 μm   |         |         |         |         |         |         |         |         |          |          |                         |

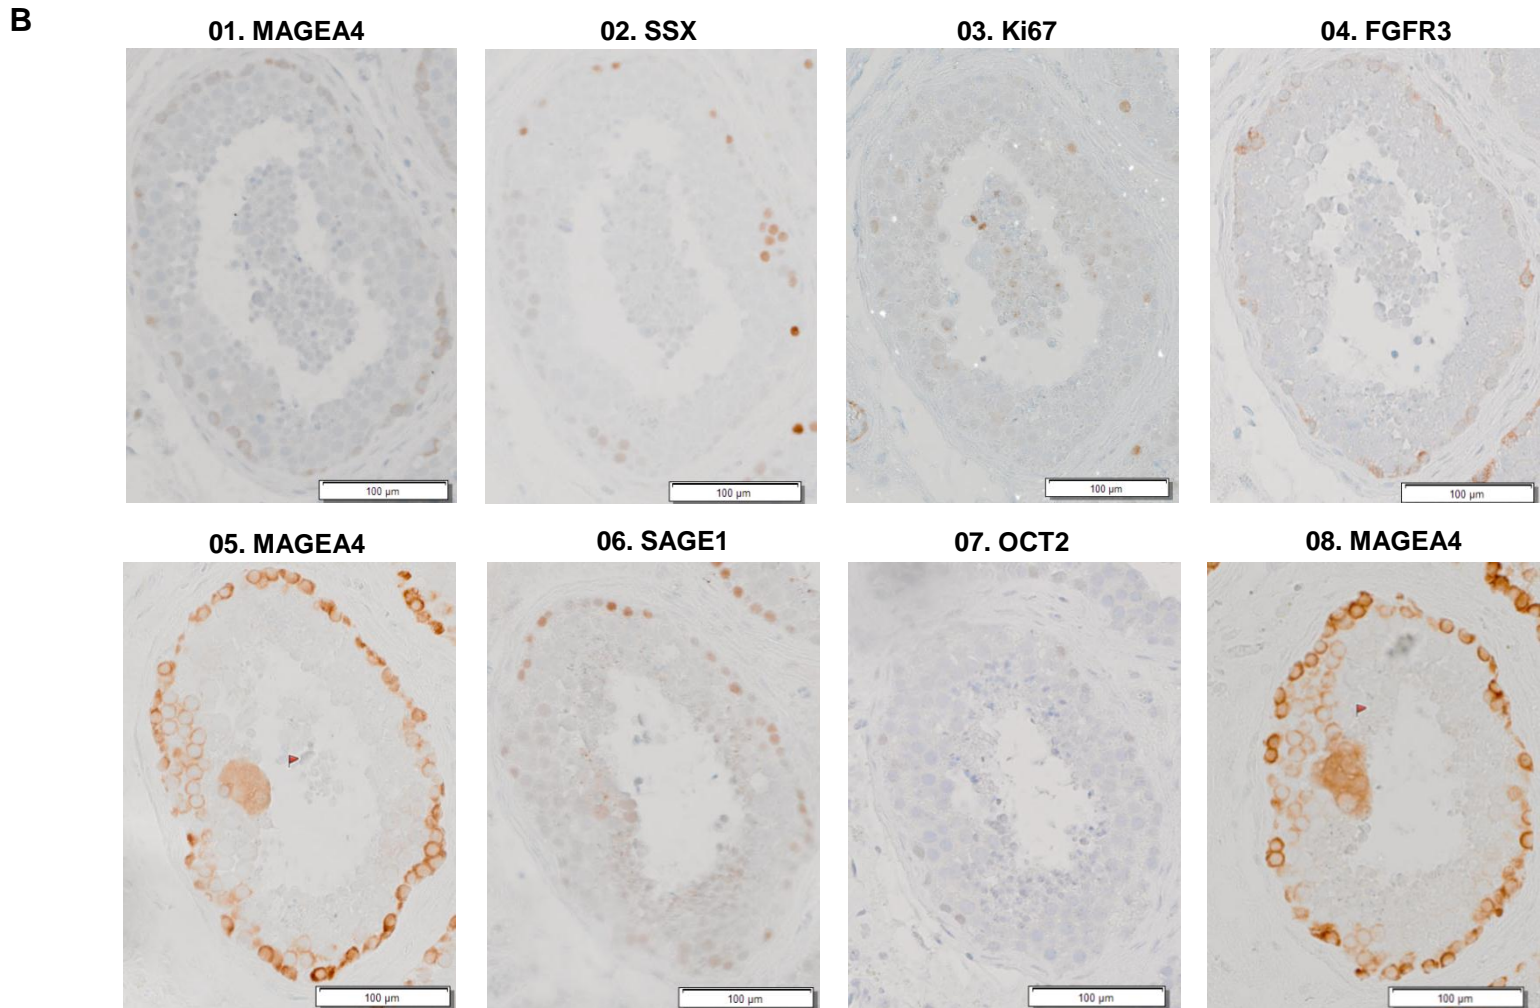

# Clone no. 1-1\_C10

**A**

| Clone no.  | Location       | Slide 1 | Slide 2 | Slide 3 | Slide 4 | Slide 5 | Slide 6 | Slide 7 | Slide 8 | Slide 9 | Slide 10 | Slide 11 | Minimum number of cells |
|------------|----------------|---------|---------|---------|---------|---------|---------|---------|---------|---------|----------|----------|-------------------------|
|            |                | MAGEA4  | SSX     | Ki67    | FGFR3   | MAGEA4  | SAGE1   | OCT2    | MAGEA4  | n.s.    | missing  | MAGEA4   |                         |
| 1-1_C10    | Near Periphery | 0       | 0       | 0       | 0       | 1       | 0       | 0       | 1       |         |          | 0        | 24                      |
|            |                |         |         |         |         | 7 cells |         |         | 5 cells |         |          |          |                         |
| 20 $\mu$ m |                |         |         |         |         |         |         |         |         |         |          |          |                         |

**B**

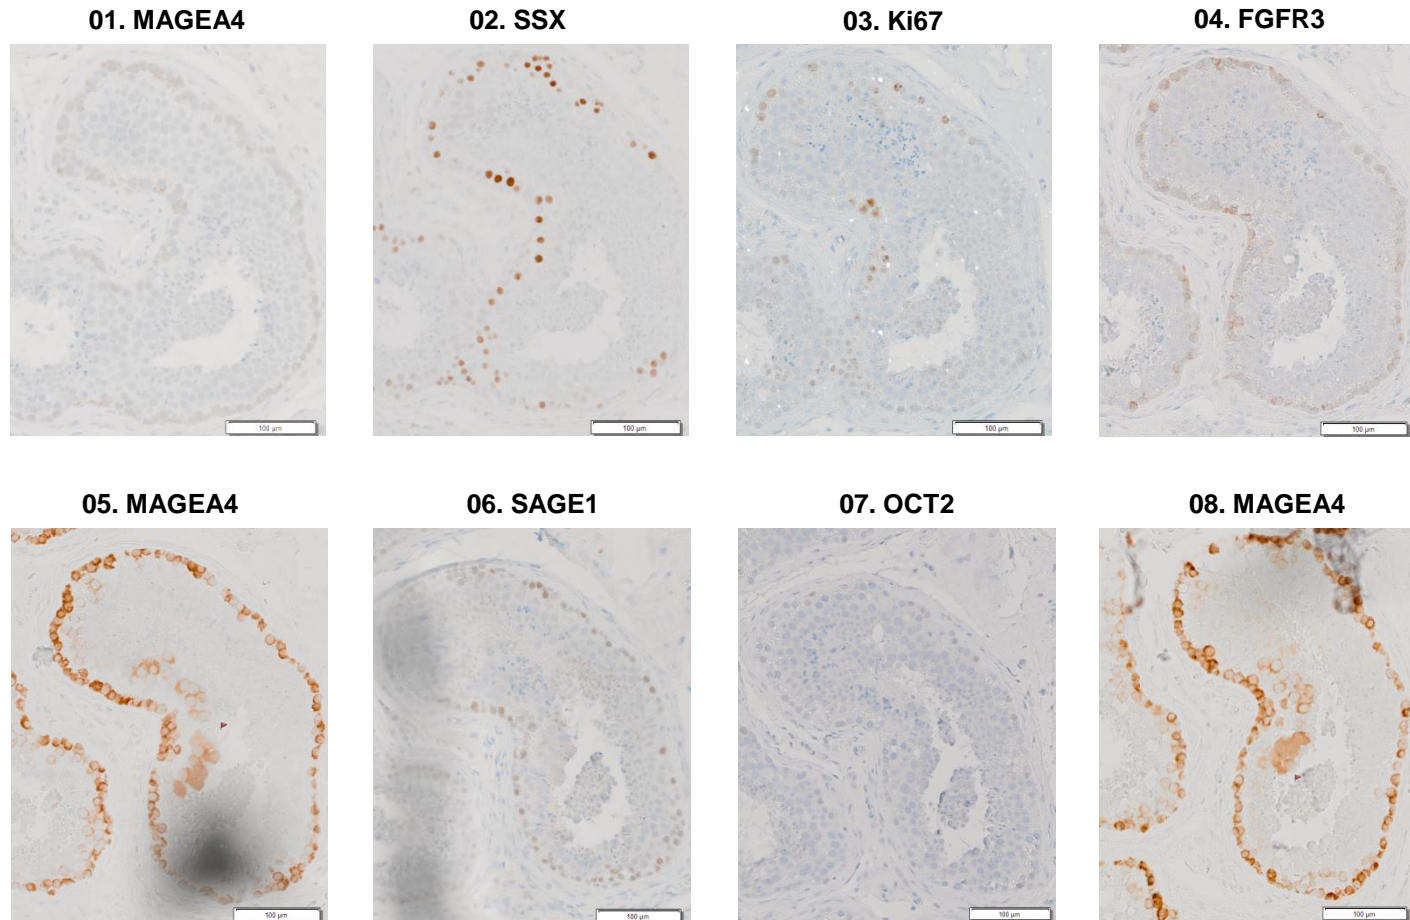

# Clone no. 1-1\_C11

**A**

| Clone no. | Location  | Slide 1 | Slide 2 | Slide 3 | Slide 4 | Slide 5 | Slide 6 | Slide 7 | Slide 8 | Slide 9 | Slide 10 | Slide 11 | Minimum number of cells |
|-----------|-----------|---------|---------|---------|---------|---------|---------|---------|---------|---------|----------|----------|-------------------------|
|           |           | MAGEA4  | SSX     | Ki67    | FGFR3   | MAGEA4  | SAGE1   | OCT2    | MAGEA4  | n.s     | missing  | MAGEA4   |                         |
| 1-1_C11   | Periphery | 0       | 0       | 0       | 0*      | 1       | 0       | 0       | 1       |         |          | 0*       | 57                      |
|           |           |         |         |         | 5 cells | 9 cells |         |         | 6 cells |         | 8 cells  |          |                         |
| 40 µm     |           |         |         |         |         |         |         |         |         |         |          |          |                         |

**B**

**02. SSX**

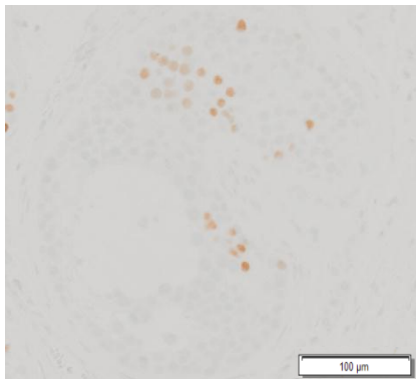

**03. Ki67**

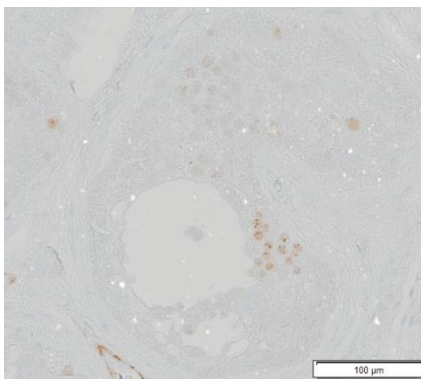

**04. FGFR3**

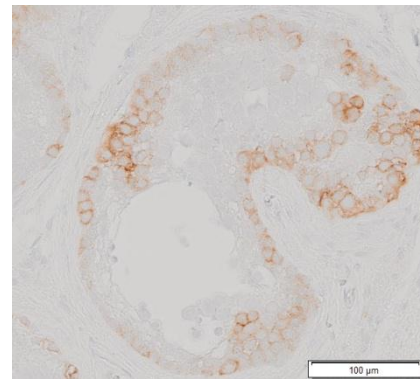

**05. MAGEA4**

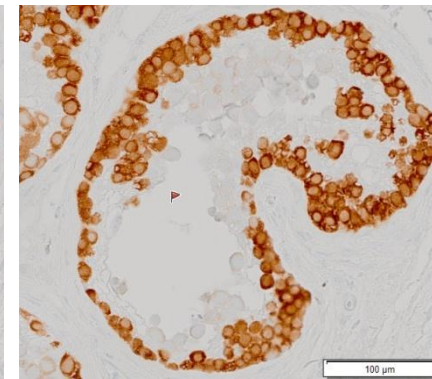

**06. SAGE1**

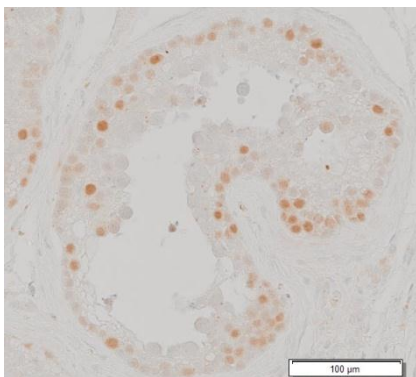

**07. OCT2**

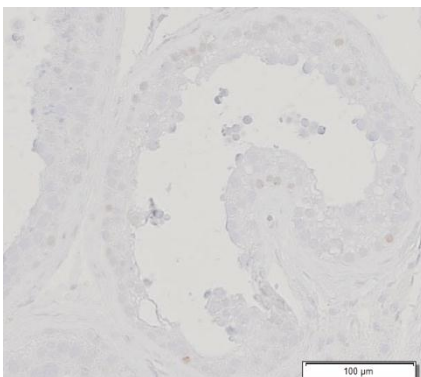

**08. MAGEA4**

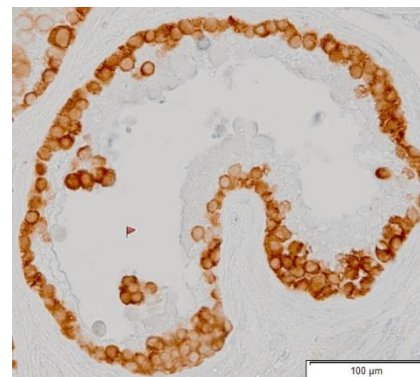

**11. MAGEA4**

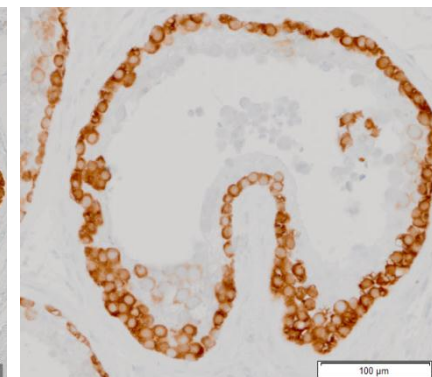

# Clone no. 1-1\_C12

**A**

| Clone no. | Location | Slide 1 | Slide 2 | Slide 3 | Slide 4 | Slide 5 | Slide 6 | Slide 7 | Slide 8  | Slide 9 | Slide 10 | Slide 11 | Minimum number of cells |
|-----------|----------|---------|---------|---------|---------|---------|---------|---------|----------|---------|----------|----------|-------------------------|
|           |          | MAGEA4  | SSX     | Ki67    | FGFR3   | MAGEA4  | SAGE1   | OCT2    | MAGEA4   | n.s     | missing  | MAGEA4   |                         |
| 1-1_C12   | Centre   | 0       | 0       | 0       | 0       | 1       | 0       | 0       | 1        |         |          | 0        | 32                      |
|           |          |         |         |         |         | 6 cells |         |         | 10 cells |         |          |          |                         |
|           |          | 20 µm   |         |         |         |         |         |         |          |         |          |          |                         |

**B**

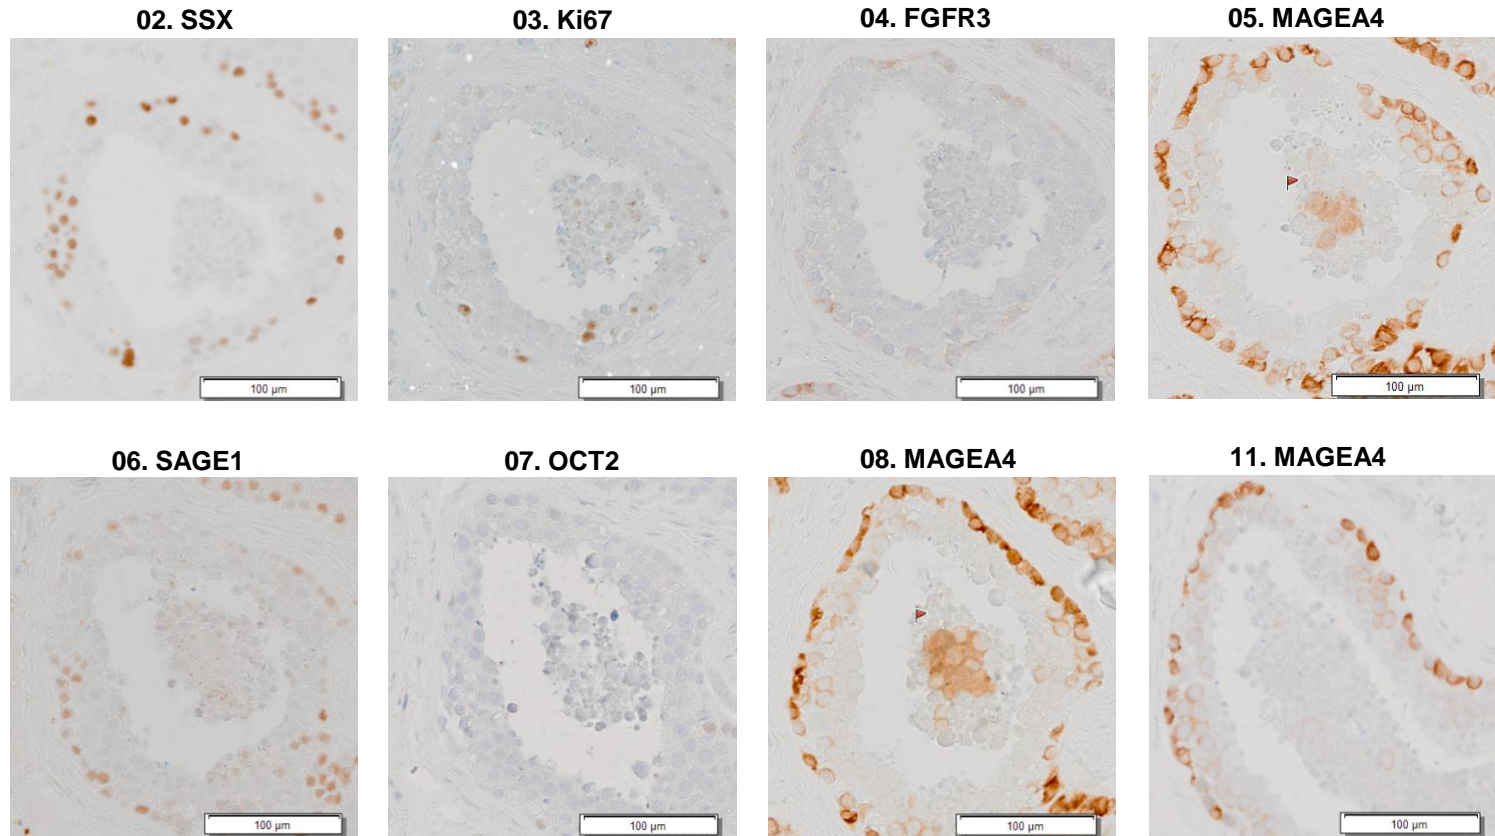

# Clone no. 1-1\_C13

**A**

| Clone no.  | Location       | Slide 1 | Slide 2 | Slide 3 | Slide 4 | Slide 5 | Slide 6 | Slide 7 | Slide 8 | Slide 9 | Slide 10 | Slide 11 | Minimum number of cells |
|------------|----------------|---------|---------|---------|---------|---------|---------|---------|---------|---------|----------|----------|-------------------------|
|            |                | MAGEA4  | SSX     | Ki67    | FGFR3   | MAGEA4  | SAGE1   | OCT2    | MAGEA4  | n.s     | missing  | MAGEA4   |                         |
| 1-1_C13    | Near Periphery | 0       | 0       | 0       | 0       | 1       | 0*      | 0       | 1       |         |          | 0        | 28                      |
|            |                |         |         |         |         | 7 cells | 4 cells |         | 7 cells |         |          |          |                         |
| 20 $\mu$ m |                |         |         |         |         |         |         |         |         |         |          |          |                         |

**B**

**01. MAGEA4**

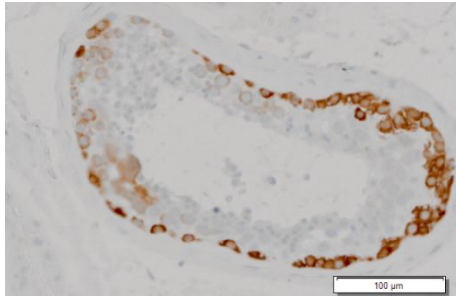

**02. SSX**

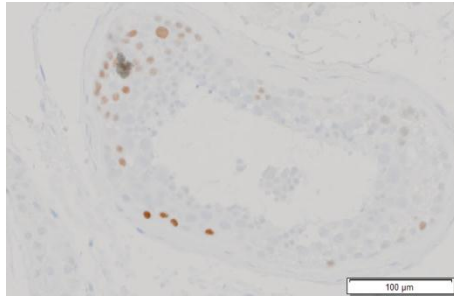

**03. Ki67**

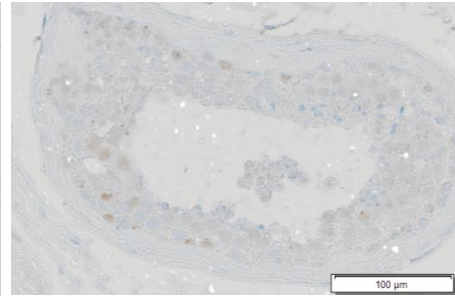

**04. FGFR3**

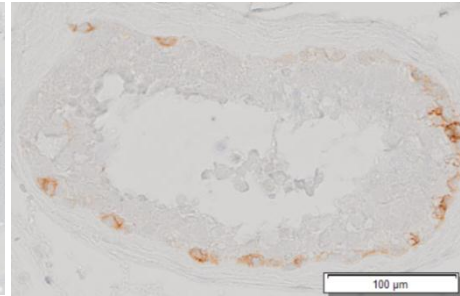

**05. MAGEA4**

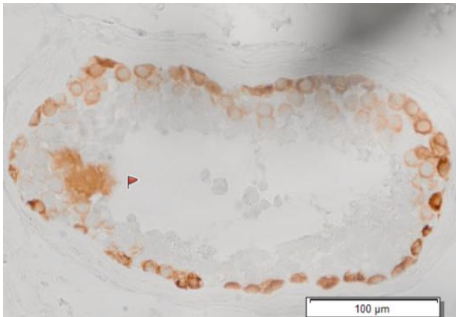

**06. SAGE1**

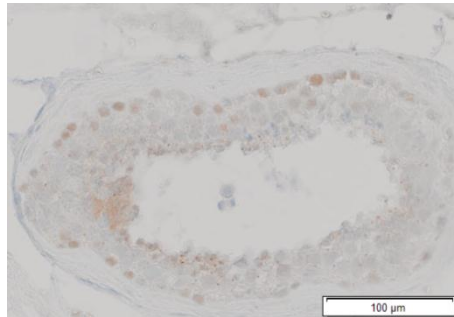

**07. OCT2**

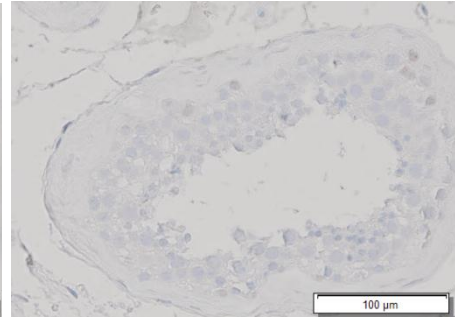

**08. MAGEA4**

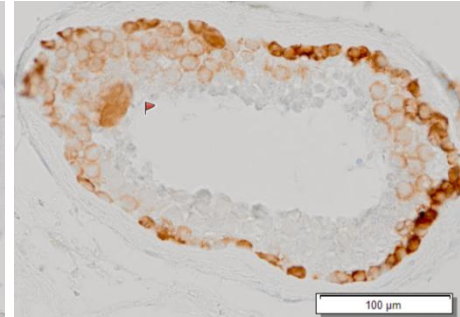

# Clone no. 1-1\_C14

**A**

| Clone no. | Location | Slide 21 | Slide 22 | Slide 23 | Slide 24 | Slide 25 | Slide 26 | Slide 27 | Slide 28 | Slide 29 | Minimum number of cells |
|-----------|----------|----------|----------|----------|----------|----------|----------|----------|----------|----------|-------------------------|
|           |          | MAGEA4   | SSX      | MAGEA4   | Ki67     | H&E      | MAGEA4   | OCT2     | MAGEA4   | FGFR3    |                         |
| 1-1_C14   | Centre   | NA       | 0        | 1        | 0        |          | 1        | 0        | 1        | NA       | 72                      |
|           |          |          |          | 13 cells |          |          | 16 cells |          | 4 cells  |          |                         |
| 30 µm     |          |          |          |          |          |          |          |          |          |          |                         |

**B**

**22. SSX**

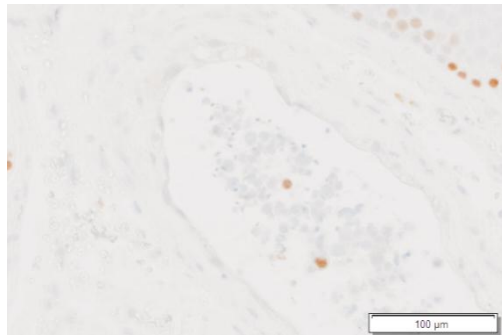

**23. MAGEA4**

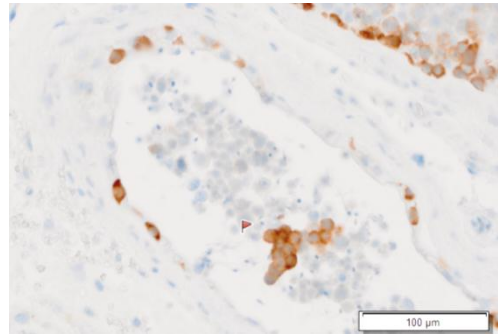

**24. Ki67**

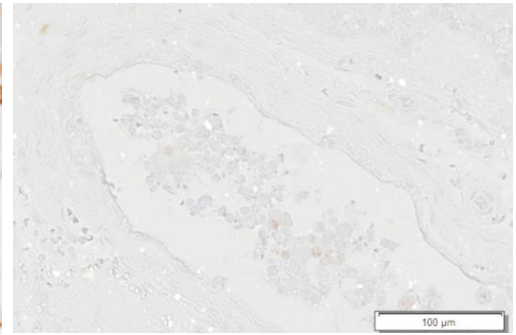

**26. MAGEA4**

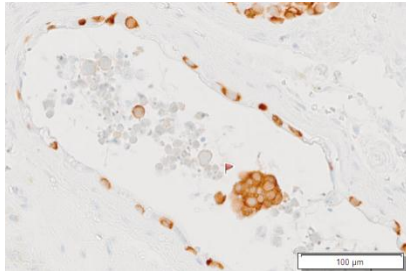

**27. OCT2**

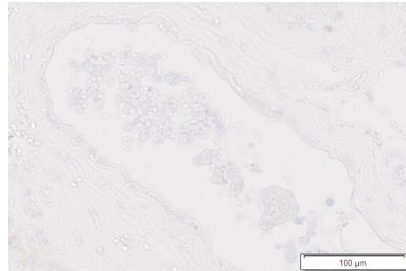

**28. MAGEA4**

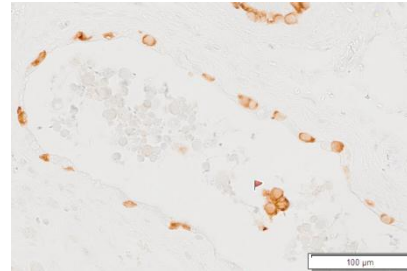

**29. FGFR3**

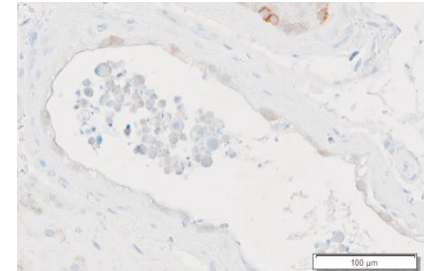

# Clone no. 1-1\_C15

**A**

| Clone no.  | Location | Slide 23      | Slide 24 | Slide 25 | Slide 26     | Slide 27 | Slide 28     | Slide 29 | Slide 30 | Slide 31      | Slide 32 | Slide 33 | Slide 34 | Slide 35      | Minimum number of cells |
|------------|----------|---------------|----------|----------|--------------|----------|--------------|----------|----------|---------------|----------|----------|----------|---------------|-------------------------|
|            |          | MAGEA4        | Ki67     | H&E      | MAGEA4       | OCT2     | MAGEA4       | FGFR3    | Ki67     | MAGEA4        | SSX      | SAGE1    | OCT2     | MAGEA4        |                         |
| 1-1_C15    | Centre   | 0*<br>2 cells | 0        |          | 1<br>7 cells | 0        | 1<br>8 cells | 0        | 0        | 0*<br>3 cells | 0        | 0        | 0        | 0*<br>2 cells | 58                      |
| 65 $\mu$ m |          |               |          |          |              |          |              |          |          |               |          |          |          |               |                         |

**B**

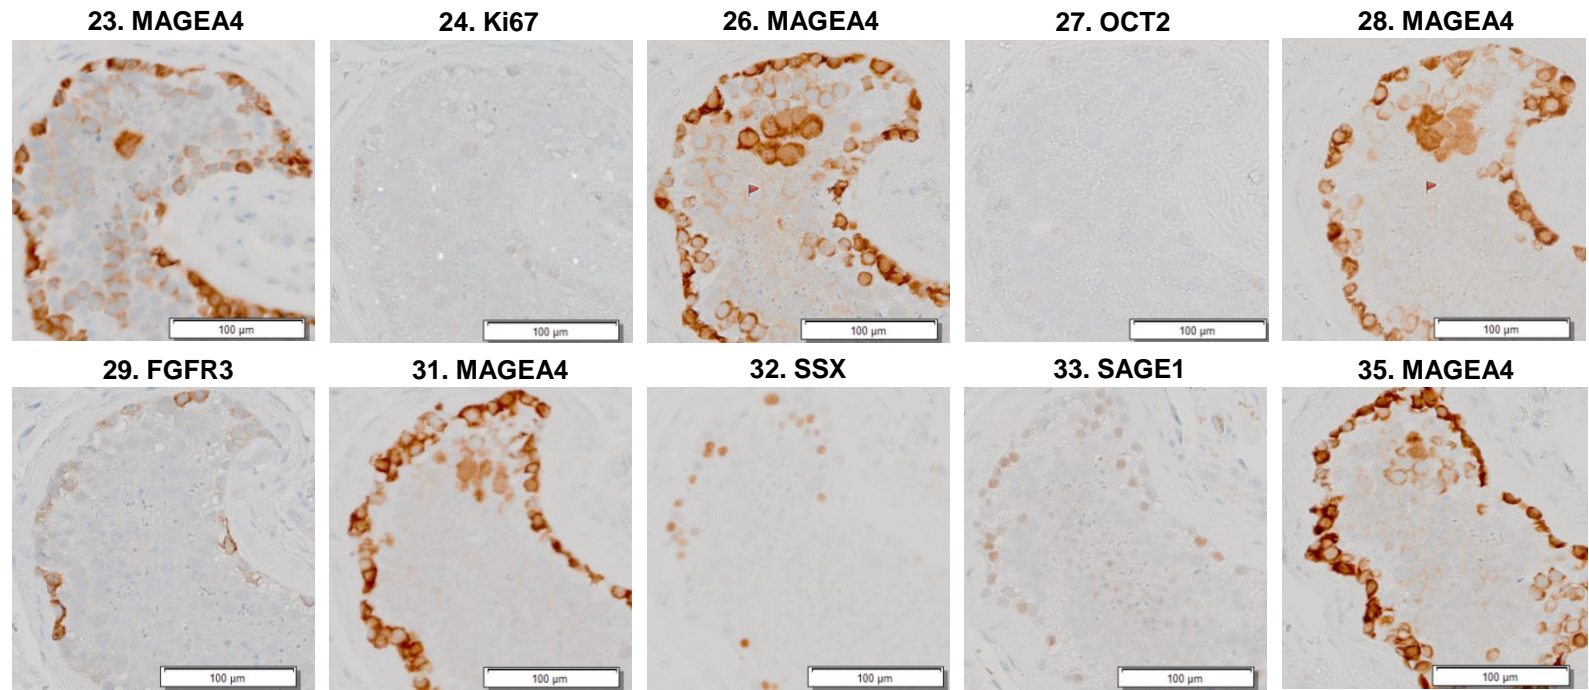



# Clone no. 1-1\_C16

**A**

| Clone no. | Location  | Slide 21 | Slide 22 | Slide 23 | Slide 24 | Slide 25 | Slide 26 | Slide 27 | Slide 28 | Slide 29 | Slide 30 | Slide 31 | Slide 32 | Slide 33 | Minimum number of cells |
|-----------|-----------|----------|----------|----------|----------|----------|----------|----------|----------|----------|----------|----------|----------|----------|-------------------------|
|           |           | MAGEA4   | SSX      | MAGEA4   | Ki67     | H&E      | MAGEA4   | OCT2     | MAGEA4   | FGFR3    | Ki67     | MAGEA4   | SSX      | SAGE1    |                         |
| 1-1_C16   | Periphery | NA       | 0        | 1        | 0        |          | 1        | 0        | 1        | 0        | 0        | 0*       | 0        | 0        | 188                     |
|           |           |          |          | 57 cells |          |          | 13 cells |          | 15 cells |          |          | 2 cells  |          |          |                         |
| 45 μm     |           |          |          |          |          |          |          |          |          |          |          |          |          |          |                         |

**B**

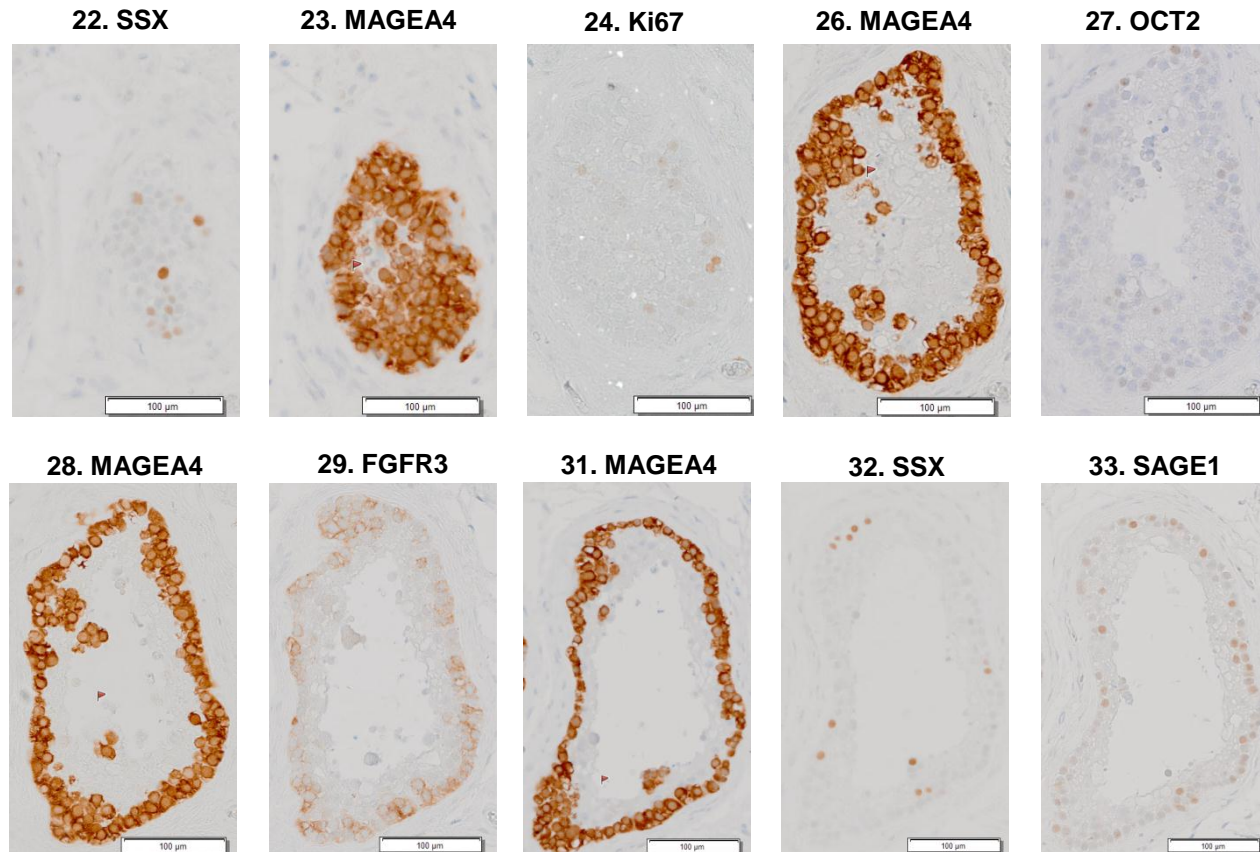

# Clone no. 1-1\_C17

**A**

| Clone no. | Location  | Slide 23 | Slide 24 | Slide 25 | Slide 26 | Slide 27 | Slide 28 | Slide 29 | Slide 30 | Slide 31 | Slide 32 | Slide 33 | Minimum number of cells |
|-----------|-----------|----------|----------|----------|----------|----------|----------|----------|----------|----------|----------|----------|-------------------------|
|           |           | MAGEA4   | Ki67     | H&E      | MAGEA4   | OCT2     | MAGEA4   | FGFR3    | Ki67     | MAGEA4   | SSX      | SAGE1    |                         |
| 1-1_C17   | Periphery | 0        | 0        |          | 1        | 0        | 1        | 0        | 0        | 0*       | 0        | 0        | 22                      |
|           |           |          |          |          | 5 cells  |          | 4 cells  |          |          | 2 cells  |          |          |                         |
| 30 µm     |           |          |          |          |          |          |          |          |          |          |          |          |                         |

**B**

**23. MAGEA4**

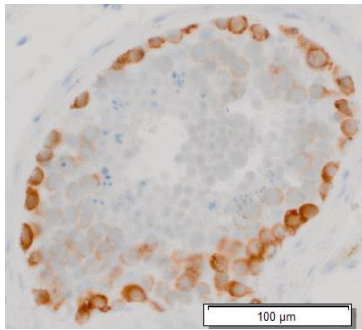

**26. MAGEA4**

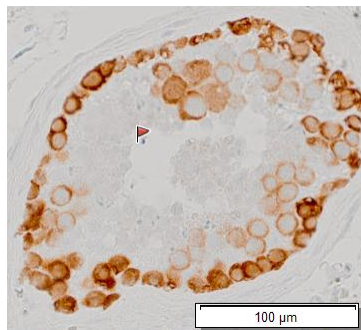

**27. OCT2**

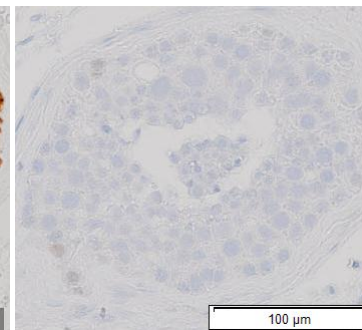

**28. MAGEA4**

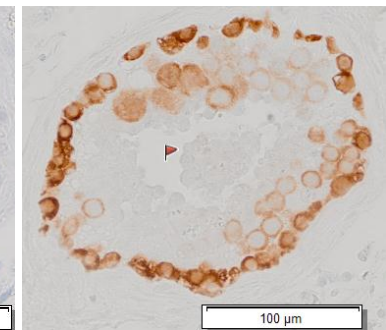

**29. FGFR3**

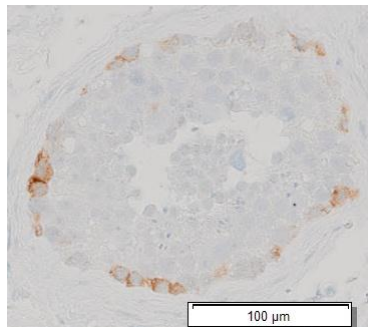

**30. Ki67**

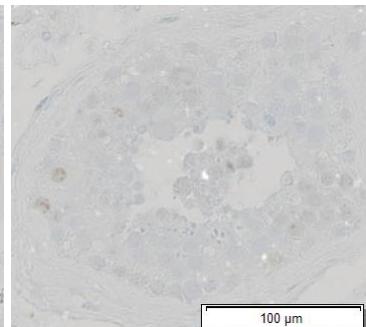

**31. MAGEA4**

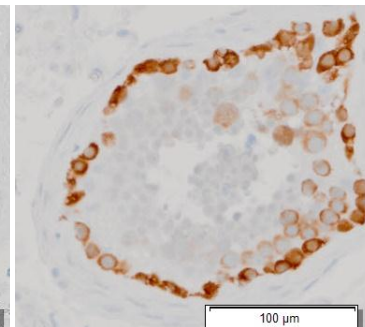

**32. SSX**

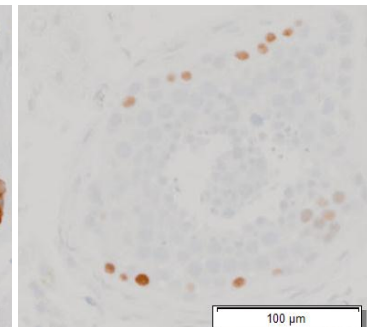

**33. SAGE1**

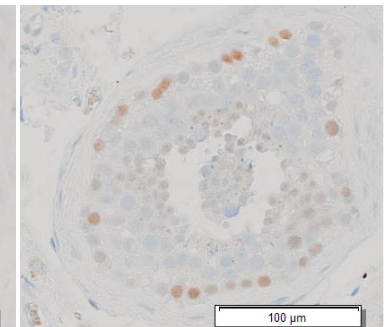

# Clone no. 1-1\_C18

**A**

| Clone no. | Location | Slide 21 | Slide 22 | Slide 23      | Slide 24 | Slide 25 | Slide 26      | Slide 27 | Slide 28     | Slide 29      | Slide 30 | Slide 31     | Slide 32 | Slide 33 | Slide 34 | Slide 35 | Minimum number of cells |
|-----------|----------|----------|----------|---------------|----------|----------|---------------|----------|--------------|---------------|----------|--------------|----------|----------|----------|----------|-------------------------|
|           |          | MAGEA4   | SSX      | MAGEA4        | Ki67     | H&E      | MAGEA4        | OCT2     | MAGEA4       | FGFR3         | Ki67     | MAGEA4       | SSX      | SAGE1    | OCT2     | MAGEA4   |                         |
| 1-1_C18   | Centre   | 0        |          | 0*<br>4 cells |          |          | 1<br>17 cells | 0        | 1<br>8 cells | 0*<br>7 cells | 0        | 1<br>9 cells | 0        | 0        |          | 0        | 89                      |
| 45 µm     |          |          |          |               |          |          |               |          |              |               |          |              |          |          |          |          |                         |

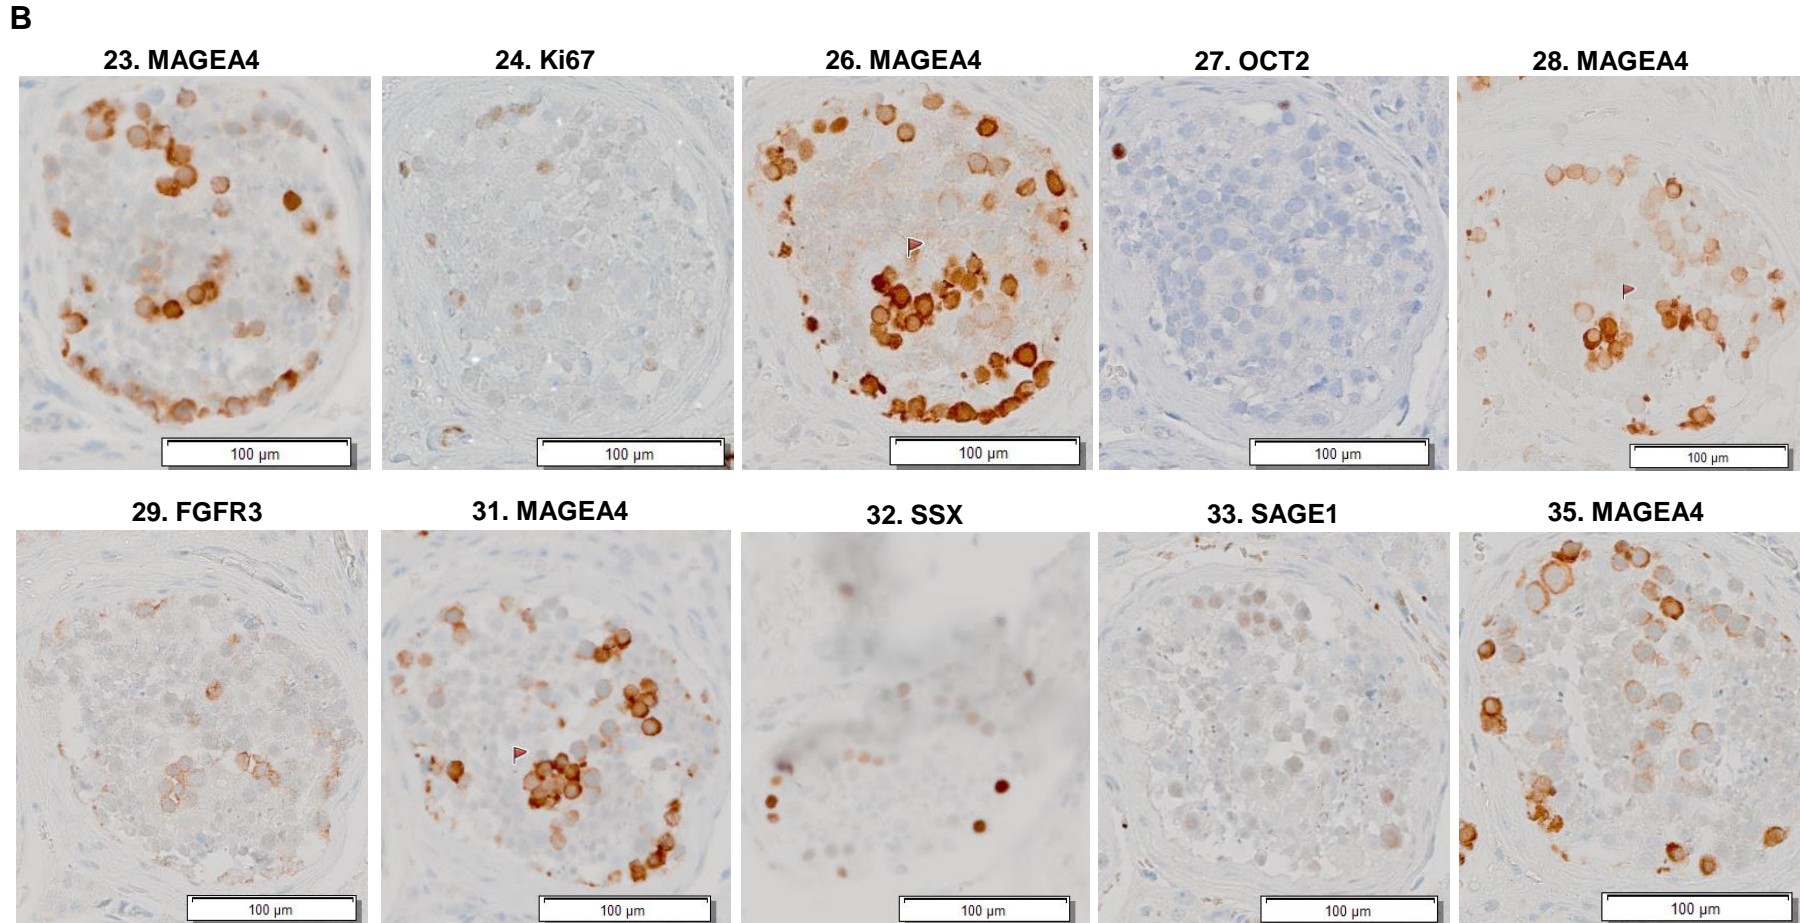

# Clone no. 1-1\_C19

**A**

| Clone no. | Location | Slide 21 | Slide 22 | Slide 23     | Slide 24 | Slide 25 | Slide 26      | Slide 27 | Slide 28     | Slide 29      | Slide 30 | Slide 31 | Minimum number of cells |
|-----------|----------|----------|----------|--------------|----------|----------|---------------|----------|--------------|---------------|----------|----------|-------------------------|
|           |          | MAGEA4   | SSX      | MAGEA4       | Ki67     | H&E      | MAGEA4        | OCT2     | MAGEA4       | FGFR3         | Ki67     | MAGEA4   |                         |
| 1-1_C19   | Centre   | 0        | NA       | 1<br>4 cells | 0        |          | 1<br>17 cells | 0        | 1<br>4 cells | 0*<br>2 cells | 0        | 0        | 59                      |
| 35 µm     |          |          |          |              |          |          |               |          |              |               |          |          |                         |

**B**

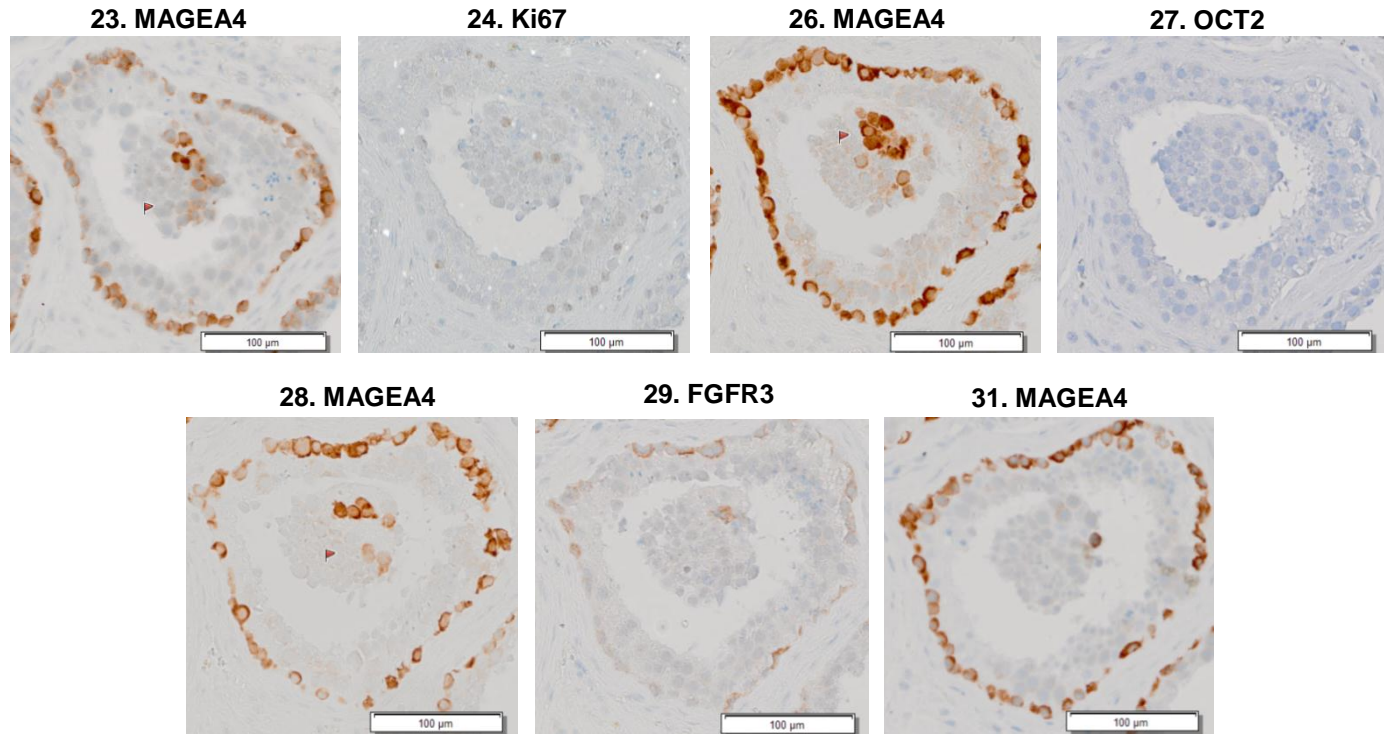

# Clone no. 1-1\_C20

**A**

| Clone no. | Location | Slide 23   | Slide 24 | Slide 25 | Slide 26 | Slide 27 | Slide 28 | Slide 29 | Slide 30 | Slide 31 | Minimum number of cells |
|-----------|----------|------------|----------|----------|----------|----------|----------|----------|----------|----------|-------------------------|
|           |          | MAGEA4     | Ki67     | H&E      | MAGEA4   | OCT2     | MAGEA4   | FGFR3    | Ki67     | MAGEA4   |                         |
| 1-1_C20   | Centre   | 0          | 0        |          | 1        | 0        | 1        | 0        | 0        | 0        | 15                      |
|           |          |            |          |          | 4 cells  |          | 6 cells  |          |          |          |                         |
|           |          | 15 $\mu$ m |          |          |          |          |          |          |          |          |                         |

**B**

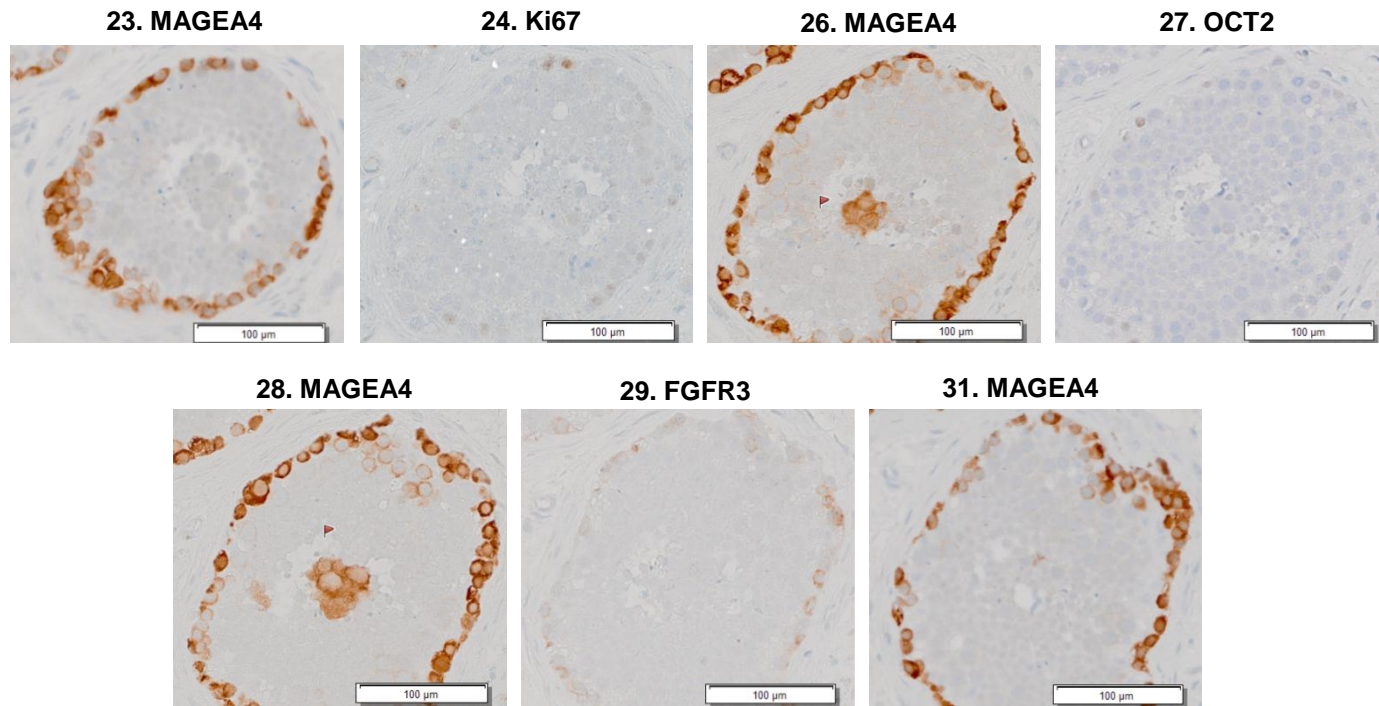

# Clone no. 1-1\_C21

**A**

| Clone no. | Location | Slide 21 | Slide 22 | Slide 23 | Slide 24 | Slide 25 | Slide 26 | Slide 27 | Slide 28 | Slide 29 | Slide 30 | Slide 31 | Minimum number of cells |
|-----------|----------|----------|----------|----------|----------|----------|----------|----------|----------|----------|----------|----------|-------------------------|
|           |          | MAGEA4   | SSX      | MAGEA4   | Ki67     | H&E      | MAGEA4   | OCT2     | MAGEA4   | FGFR3    | Ki67     | MAGEA4   |                         |
| 1-1_C21   | Centre   | NA       |          | 1        | 0        |          | 1        | 0        | 0*       | 0        | 0        | 0        | 44                      |
|           |          |          |          | 9 cells  |          | 9 cells  | 2 cells  |          |          |          |          |          |                         |
| 30 μm     |          |          |          |          |          |          |          |          |          |          |          |          |                         |

**B**

**23. MAGEA4**

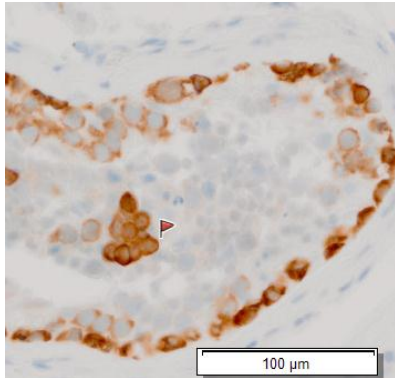

**24. Ki67**

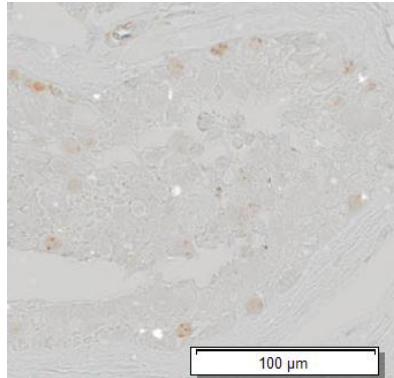

**26. MAGEA4**

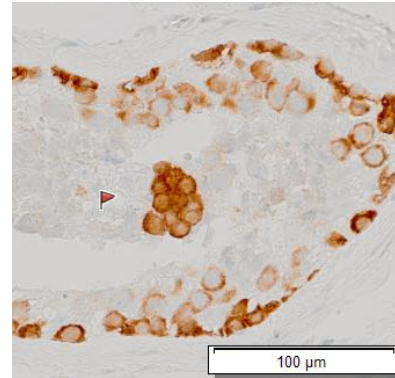

**27. OCT2**

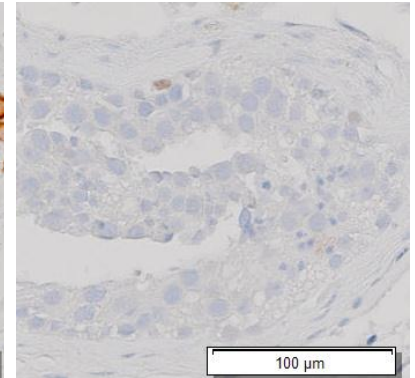

**28. MAGEA4**

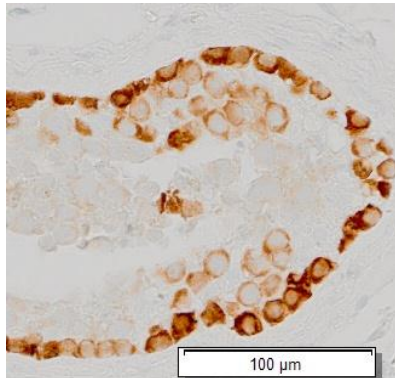

**29. FGFR3**

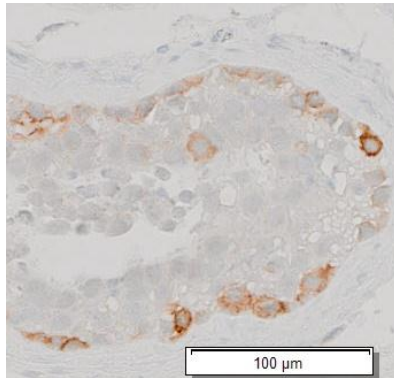

**31. MAGEA4**

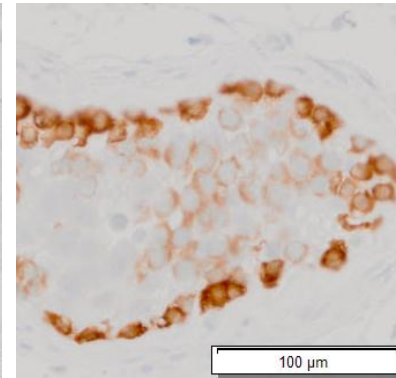

# Clone no. 1-1\_C22

**A**

| Clone no.  | Location | Slide 23 | Slide 24 | Slide 25 | Slide 26 | Slide 27 | Slide 28 | Slide 29 | Slide 30 | Slide 31 | Minimum number of cells |
|------------|----------|----------|----------|----------|----------|----------|----------|----------|----------|----------|-------------------------|
|            |          | MAGEA4   | Ki67     | H&E      | MAGEA4   | OCT2     | MAGEA4   | FGFR3    | Ki67     | MAGEA4   |                         |
| 1-1_C22    | Centre   | NA       | 0        |          | 1        | 0        | 1        | 0        | 0        | 0        | 15                      |
|            |          |          |          |          | 5 cells  |          | 5 cells  |          |          |          |                         |
| 15 $\mu$ m |          |          |          |          |          |          |          |          |          |          |                         |

**B**

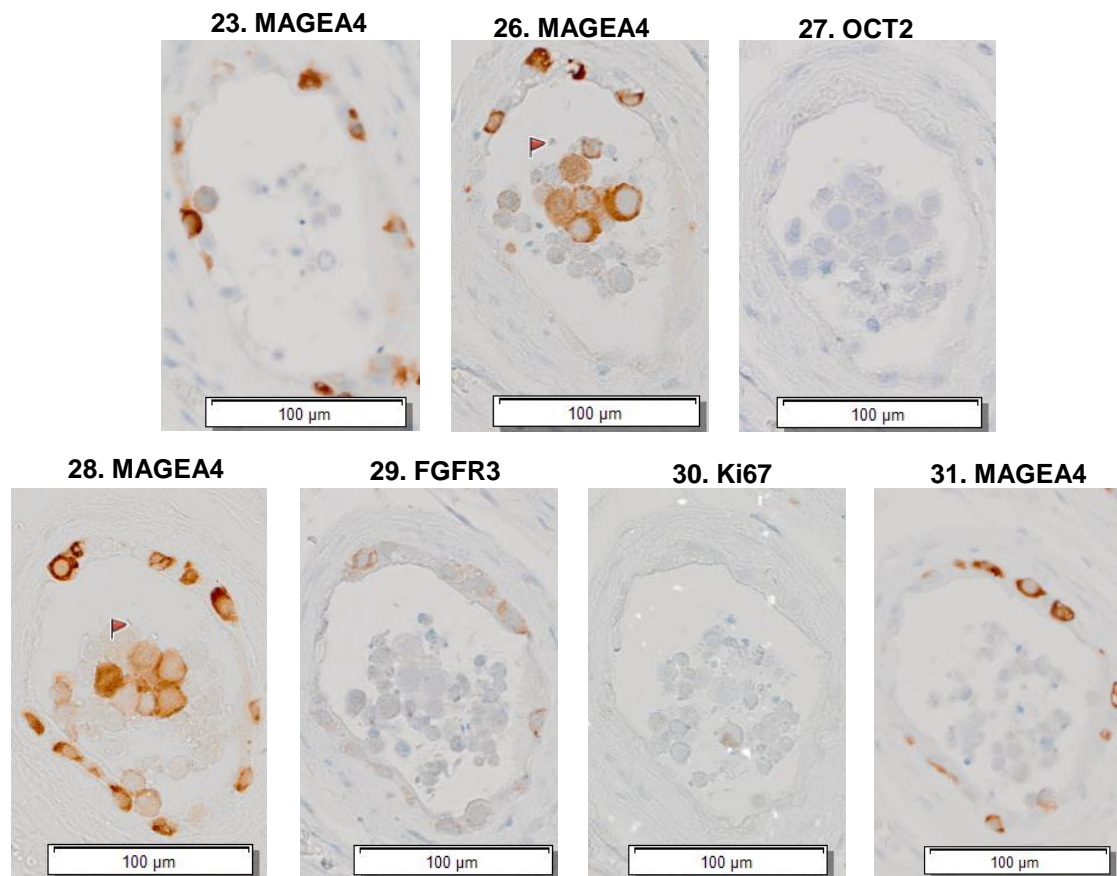

# Clone no. 1-1\_C23

**A**

| Clone no.  | Location  | Slide 23 | Slide 24 | Slide 25 | Slide 26 | Slide 27 | Slide 28 | Slide 29 | Slide 30 | Slide 31 | Minimum number of cells |
|------------|-----------|----------|----------|----------|----------|----------|----------|----------|----------|----------|-------------------------|
|            |           | MAGEA4   | Ki67     | H&E      | MAGEA4   | OCT2     | MAGEA4   | FGFR3    | Ki67     | MAGEA4   |                         |
| 1-1_C23    | Periphery | 0        | 0        |          | 1        | 0        | 1        | 0        | 0        | 0        | 27                      |
|            |           |          |          |          | 10 cells |          | 8 cells  |          |          |          |                         |
| 15 $\mu$ m |           |          |          |          |          |          |          |          |          |          |                         |

**B**

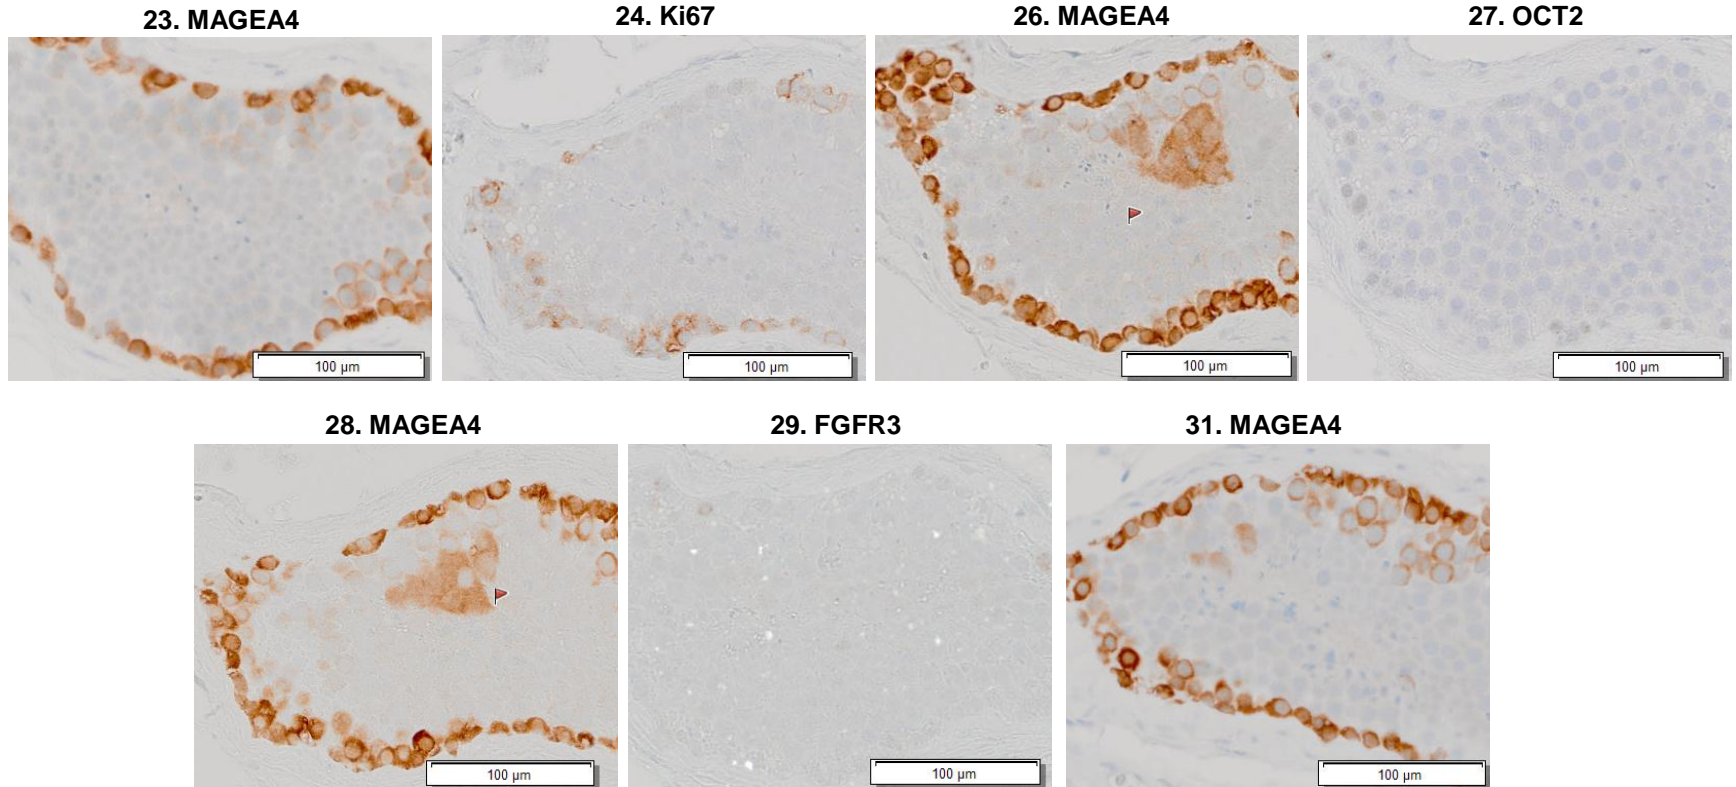



# Clone no. 1-1\_C24

**A**

| Clone no. | Location  | Slide 21 | Slide 22 | Slide 23 | Slide 24 | Slide 25 | Slide 26 | Slide 27 | Slide 28 | Slide 29 | Slide 30 | Slide 31 | Minimum number of cells |
|-----------|-----------|----------|----------|----------|----------|----------|----------|----------|----------|----------|----------|----------|-------------------------|
|           |           | MAGEA4   | SSX      | MAGEA4   | Ki67     | H&E      | MAGEA4   | OCT2     | MAGEA4   | FGFR3    | Ki67     | MAGEA4   |                         |
| 1-1_C24   | Periphery | NA       | 0        | 1        | 0        |          | 1        | 0        | 0*       | 0        | 0        | 0        | 58                      |
|           |           |          |          | 7 cells  |          |          | 15 cells |          | 4 cells  |          |          |          |                         |
| 30 μm     |           |          |          |          |          |          |          |          |          |          |          |          |                         |

**B**

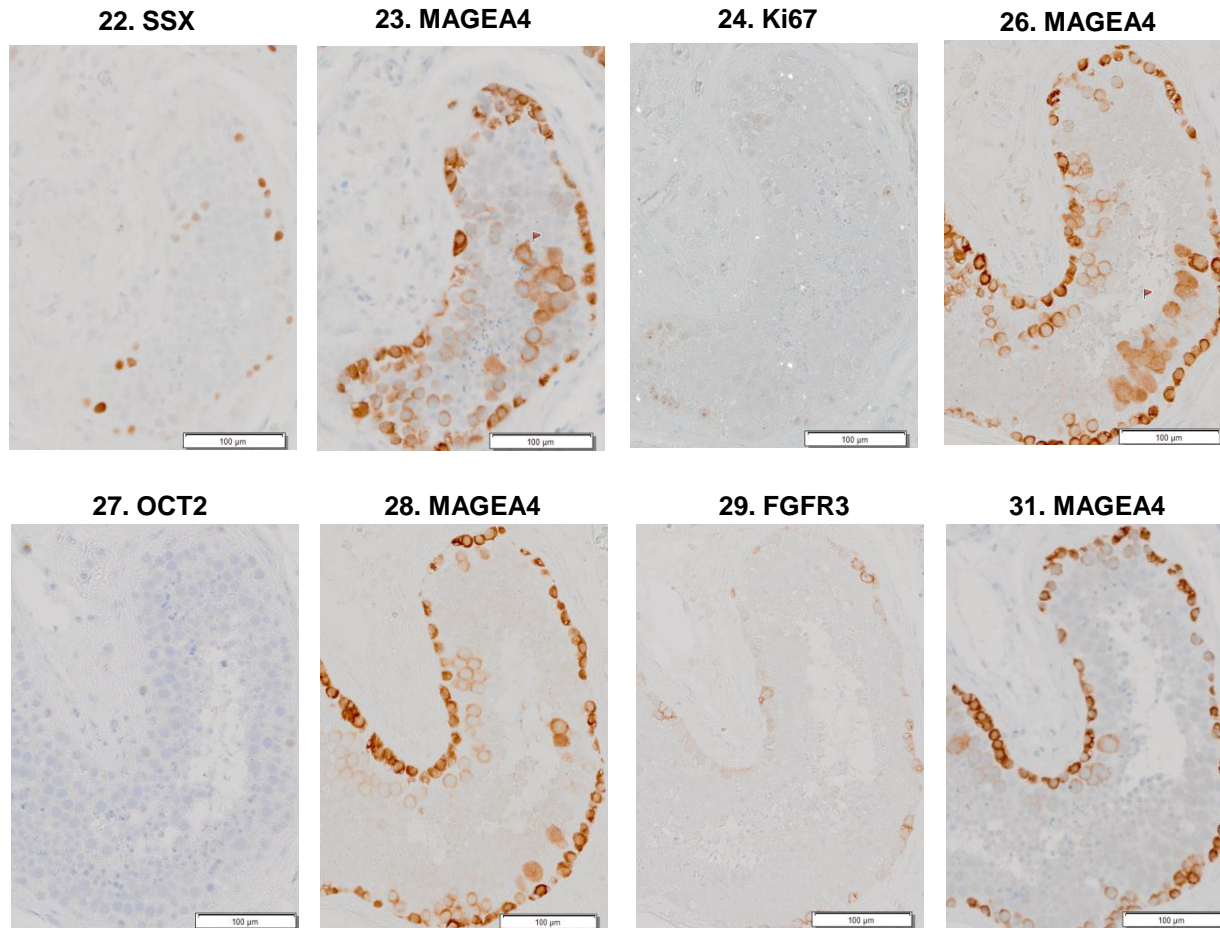

# Clone no. 1-1\_C25

**A**

| Clone no. | Location       | Slide 21 | Slide 22 | Slide 23 | Slide 24 | Slide 25 | Slide 26 | Slide 27 | Slide 28 | Slide 29 | Slide 30 | Slide 31 | Minimum number of cells |
|-----------|----------------|----------|----------|----------|----------|----------|----------|----------|----------|----------|----------|----------|-------------------------|
|           |                | MAGEA4   | SSX      | MAGEA4   | Ki67     | H&E      | MAGEA4   | OCT2     | MAGEA4   | FGFR3    | Ki67     | MAGEA4   |                         |
| 1-1_C25   | Near Periphery |          | 0        | 0*       | 0        |          | 1        | 0        | 1        | 0        | 0        | 0        | 26                      |
|           |                |          |          | 1 cell   |          |          | 7 cells  |          | 4 cells  |          |          |          |                         |
| 30 μm     |                |          |          |          |          |          |          |          |          |          |          |          |                         |

**B**

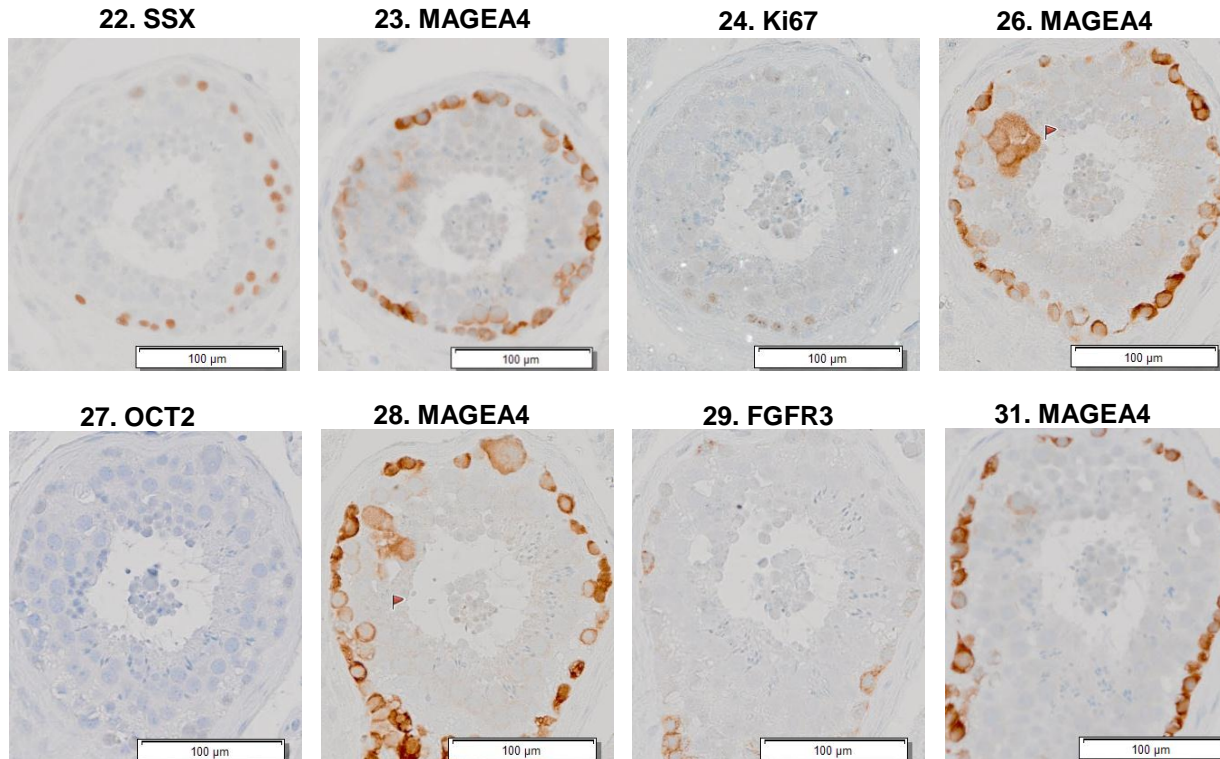

# Clone no. 1-1\_C26

**A**

| Clone no. | Location       | Slide 21 | Slide 22 | Slide 23 | Slide 24 | Slide 25 | Slide 26 | Slide 27 | Slide 28 | Slide 29 | Slide 30 | Slide 31 | Minimum number of cells |
|-----------|----------------|----------|----------|----------|----------|----------|----------|----------|----------|----------|----------|----------|-------------------------|
|           |                | MAGEA4   | SSX      | MAGEA4   | Ki67     | H&E      | MAGEA4   | OCT2     | MAGEA4   | FGFR3    | Ki67     | MAGEA4   |                         |
| 1-1_C26   | Near Periphery | 0        | 0        | 0*       | 0        |          | 1        | 0        | 1        | 0        | 0        | 0        | 43                      |
|           |                |          |          | 7 cells  |          |          | 8 cells  |          | 6 cells  |          |          |          |                         |
| 30 μm     |                |          |          |          |          |          |          |          |          |          |          |          |                         |

**B**

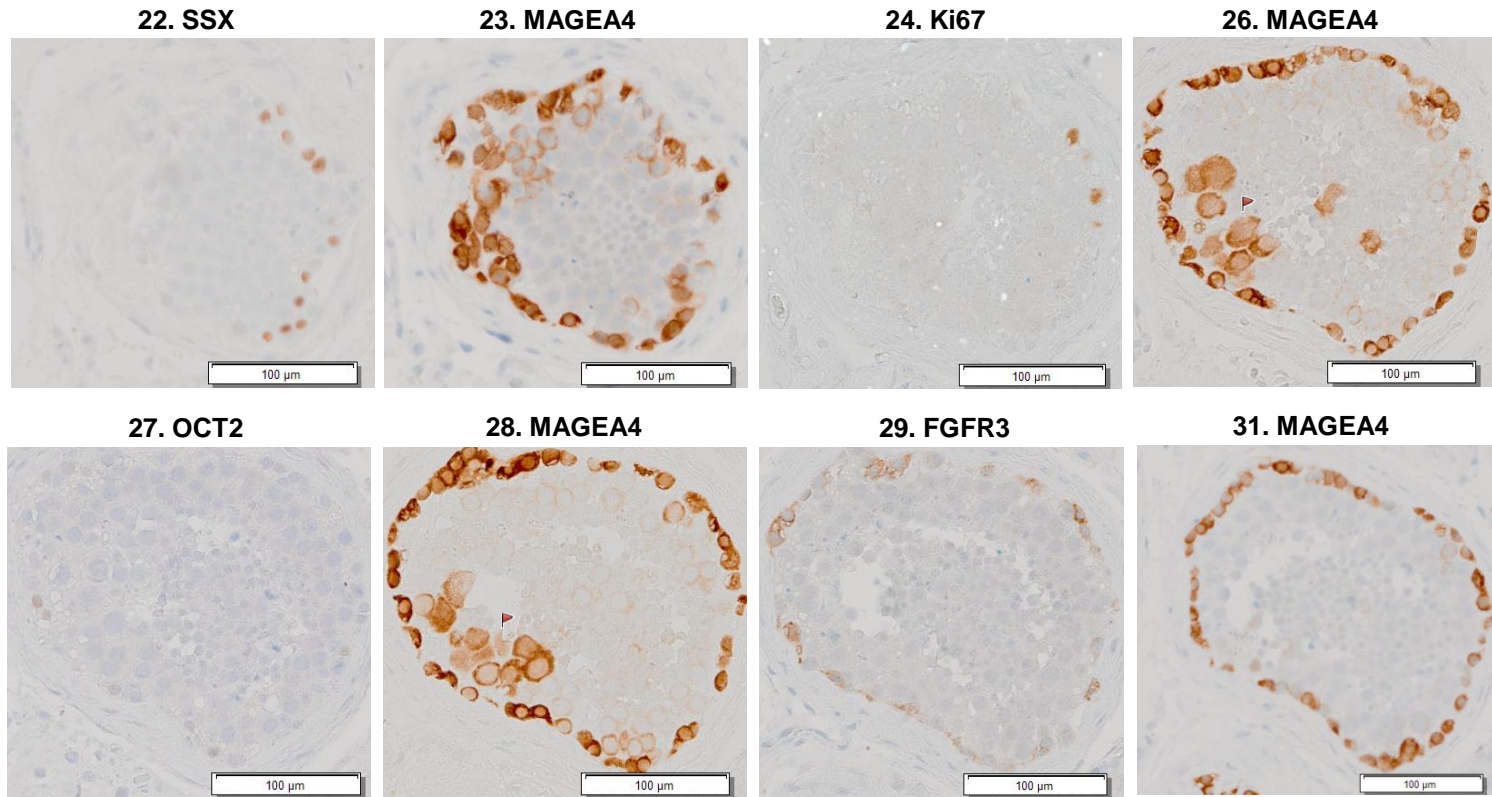

# Clone no. 1-1\_C27

**A**

| Clone no. | Location | Slide 21 | Slide 22 | Slide 23     | Slide 24 | Slide 25 | Slide 26      | Slide 27 | Slide 28      | Slide 29 | Slide 30 | Slide 31      | Slide 32 | Slide 33 | Slide 34 | Slide 35      | Slide 36 | Slide 37 | Slide 38 | Slide 39 | Slide 40 | Slide 41 | Minimum number of cells |
|-----------|----------|----------|----------|--------------|----------|----------|---------------|----------|---------------|----------|----------|---------------|----------|----------|----------|---------------|----------|----------|----------|----------|----------|----------|-------------------------|
|           |          | MAGEA4   | SSX      | MAGEA4       | Ki67     | H&E      | MAGEA4        | OCT2     | MAGEA4        | FGFR3    | Ki67     | MAGEA4        | SSX      | SAGE1    | OCT2     | MAGEA4        | n.s.     | n.s.     | n.s.     | n.s.     | n.s.     | MAGEA4   |                         |
| 1-1_C27   | Centre   | NA       | 0        | 1<br>4 cells |          |          | 1<br>20 cells | 0        | 1<br>22 cells | 0        | 0        | 0*<br>5 cells | 0        | 0        | 0        | 1<br>13 cells |          |          |          |          |          | 0        | 163                     |
| 65 µm     |          |          |          |              |          |          |               |          |               |          |          |               |          |          |          |               |          |          |          |          |          |          |                         |

**B**

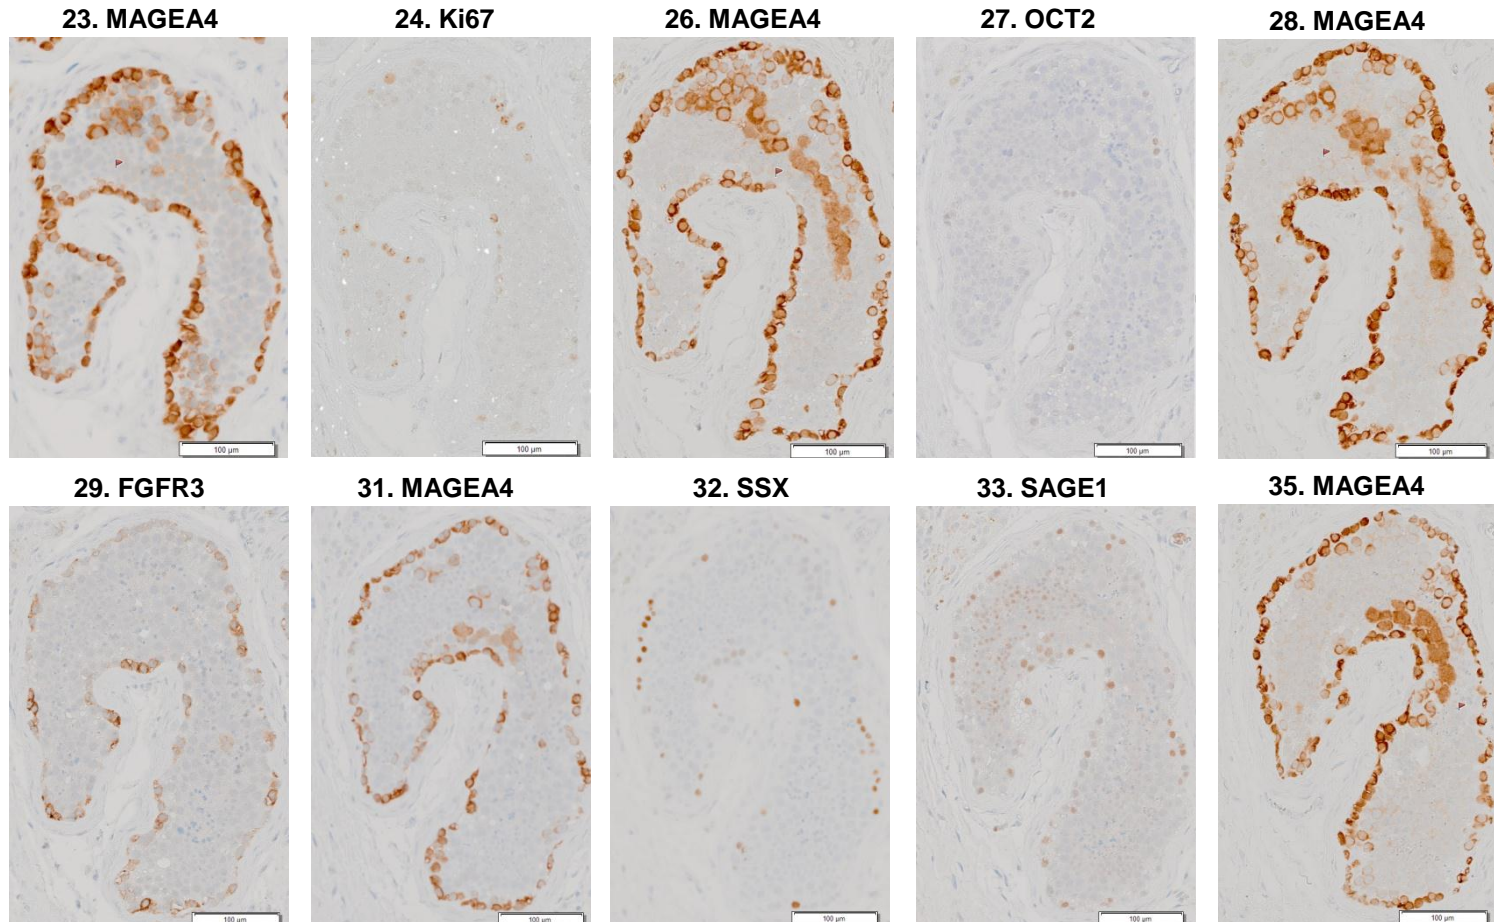

# Clone no. 1-1\_C28

**A**

| Clone no. | Location | Slide 21 | Slide 22 | Slide 23 | Slide 24 | Slide 25 | Slide 26 | Slide 27 | Slide 28 | Slide 29 | Slide 30 | Slide 31 | Minimum number of cells |
|-----------|----------|----------|----------|----------|----------|----------|----------|----------|----------|----------|----------|----------|-------------------------|
|           |          | MAGEA4   | SSX      | MAGEA4   | Ki67     | H&E      | MAGEA4   | OCT2     | MAGEA4   | FGFR3    | Ki67     | MAGEA4   |                         |
| 1-1_C28   | Centre   | 0        | 0        | 1        | 0        |          | 1        | 0        | 0*       | 0        | 0        | NA       | 24                      |
|           |          |          |          | 4 cells  |          |          | 5 cells  | 2 cells  |          |          |          |          |                         |
| 30 µm     |          |          |          |          |          |          |          |          |          |          |          |          |                         |

**B**

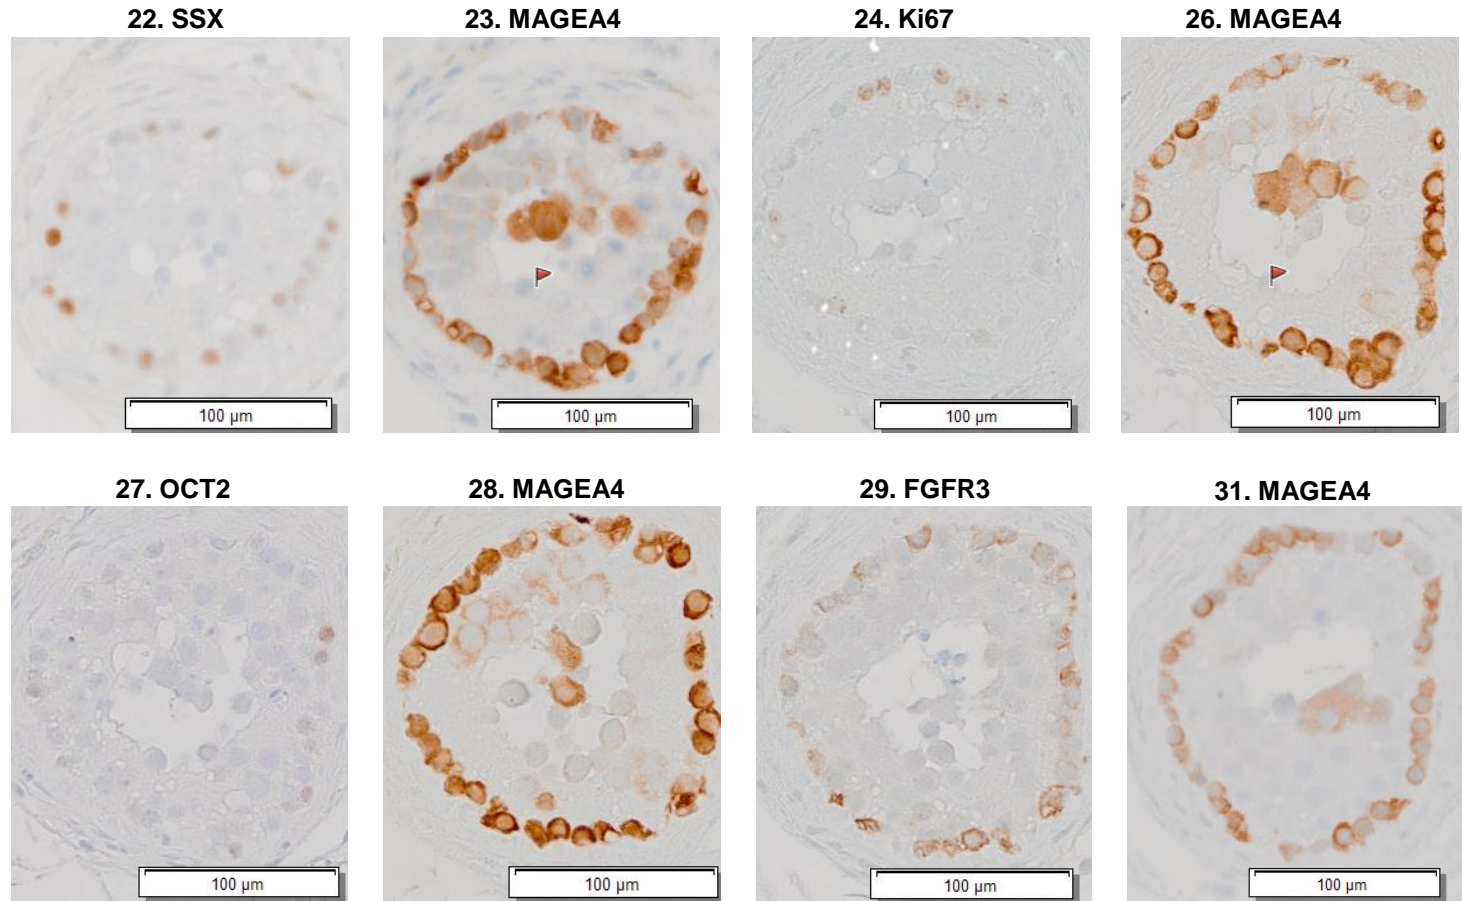

# Clone no. 1-1\_C29

**A**

| Clone no. | Location | Slide 21 | Slide 22 | Slide 23 | Slide 24 | Slide 25 | Slide 26 | Slide 27 | Slide 28 | Slide 29 | Slide 30 | Slide 31 | Minimum number of cells |
|-----------|----------|----------|----------|----------|----------|----------|----------|----------|----------|----------|----------|----------|-------------------------|
|           |          | MAGEA4   | SSX      | MAGEA4   | Ki67     | H&E      | MAGEA4   | OCT2     | MAGEA4   | FGFR3    | Ki67     | MAGEA4   |                         |
| 1-1_C29   | Centre   | 0        | 0        | 0*       | 0        |          | 1        | 0        | 1        | 0        | 0        | 0        | 42                      |
|           |          |          |          | 5 cells  |          |          | 9 cells  |          | 6 cells  |          |          |          |                         |
| 30 µm     |          |          |          |          |          |          |          |          |          |          |          |          |                         |

**B**

**22. SSX**

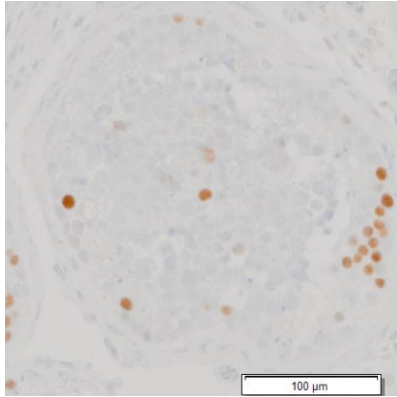

**23. MAGEA4**

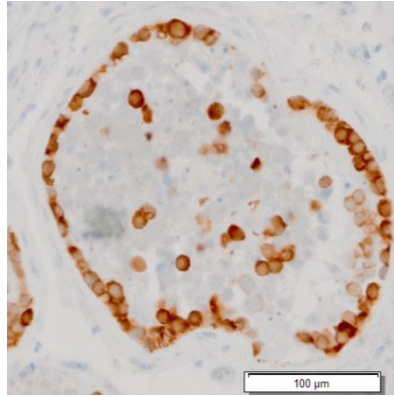

**24. Ki67**

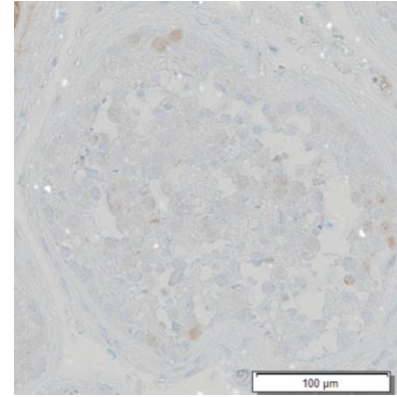

**26. MAGEA4**

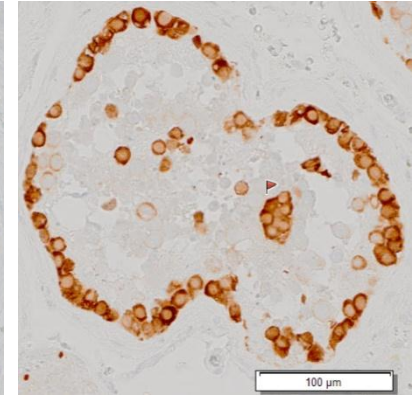

**27. OCT2**

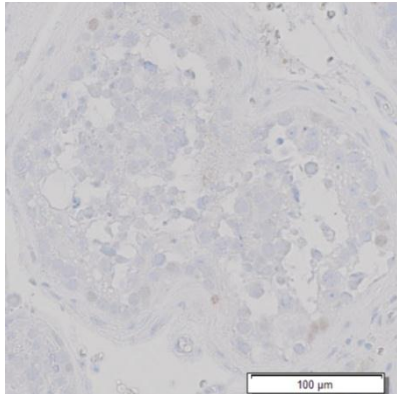

**28. MAGEA4**

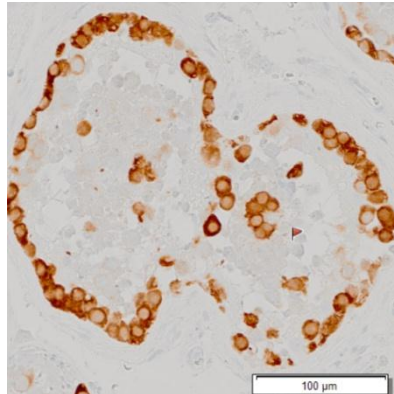

**29. FGFR3**

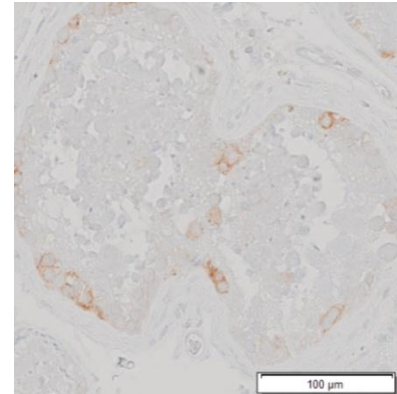

**31. MAGEA4**

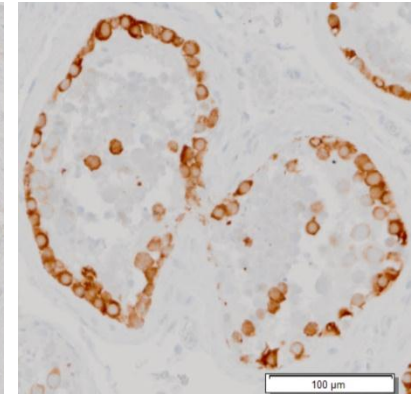

# Clone no. 1-1\_C30

**A**

| Clone no. | Location | Slide 23 | Slide 24 | Slide 25 | Slide 26 | Slide 27 | Slide 28 | Slide 29 | Slide 30 | Slide 31 | Minimum number of cells |
|-----------|----------|----------|----------|----------|----------|----------|----------|----------|----------|----------|-------------------------|
|           |          | MAGEA4   | Ki67     | H&E      | MAGEA4   | OCT2     | MAGEA4   | FGFR3    | Ki67     | MAGEA4   |                         |
| 1-1_C30   | Centre   | 0        | 0        |          | 1        | 0        | 1        | 0        | 0        | 0        | 15                      |
|           |          |          |          |          | 5 cells  |          | 5 cells  |          |          |          |                         |
| 15 µm     |          |          |          |          |          |          |          |          |          |          |                         |

**B**

**23. MAGEA4**

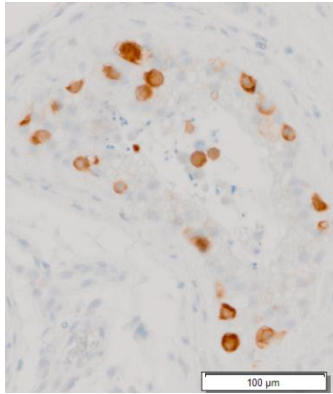

**24. Ki67**

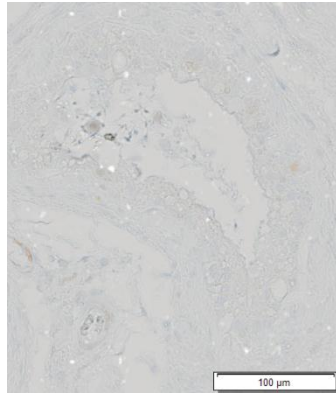

**26. MAGEA4**

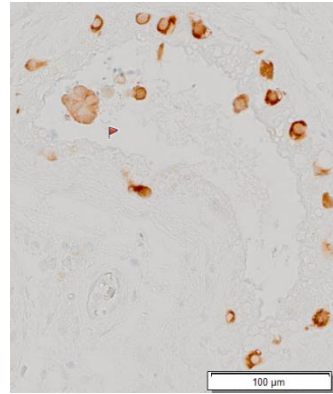

**27. OCT2**

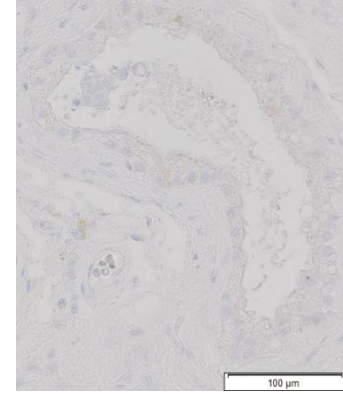

**28. MAGEA4**

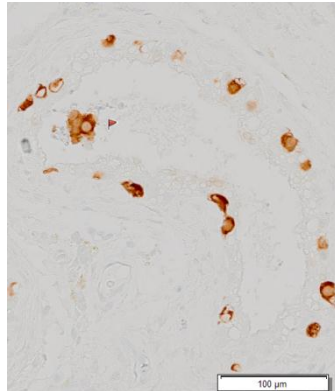

**29. FGFR3**

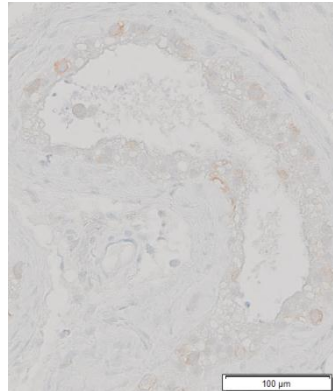

**31. MAGEA4**

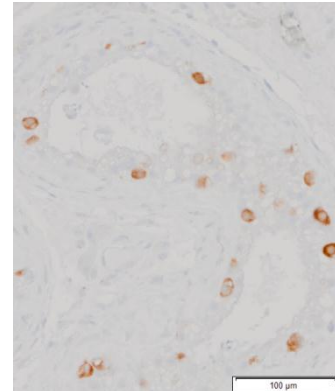

# Clone no. 1-1\_C31

**A**

| Clone no. | Location       | Slide 23 | Slide 24 | Slide 25 | Slide 26     | Slide 27 | Slide 28      | Slide 29 | Slide 30 | Slide 31 | Slide 32 | Slide 33 | Minimum number of cells |
|-----------|----------------|----------|----------|----------|--------------|----------|---------------|----------|----------|----------|----------|----------|-------------------------|
|           |                | MAGEA4   | Ki67     | H&E      | MAGEA4       | OCT2     | MAGEA4        | FGFR3    | Ki67     | MAGEA4   | SSX      | SAGE1    |                         |
| 1-1_C31   | Near Periphery | 0        | 0        |          | 1<br>6 cells | 0        | 1<br>11 cells | 0        | 0        | 0*       | 0        | 0        | 41                      |
| 30 μm     |                |          |          |          |              |          |               |          |          |          |          |          |                         |

**B**

23. MAGEA4

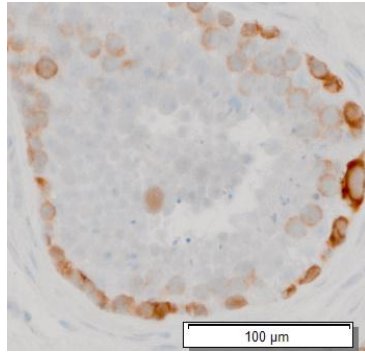

26. MAGEA4

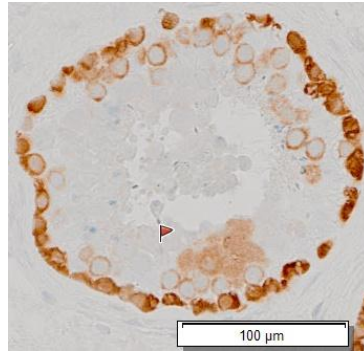

27. OCT2

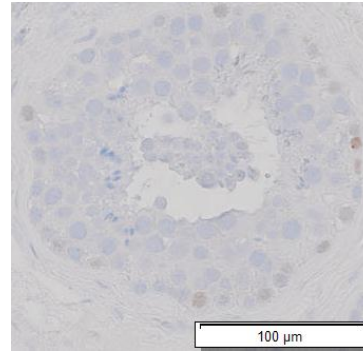

28. MAGEA4

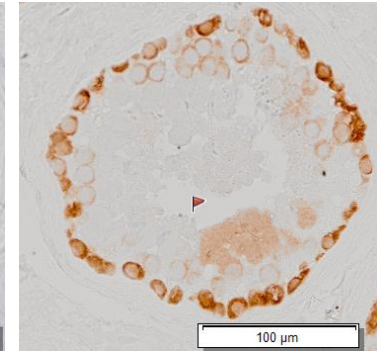

29. FGFR3

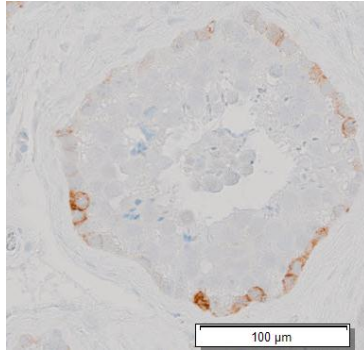

30. Ki67

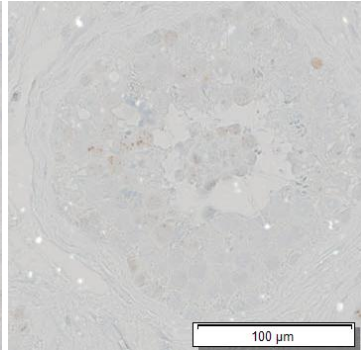

31. MAGEA4

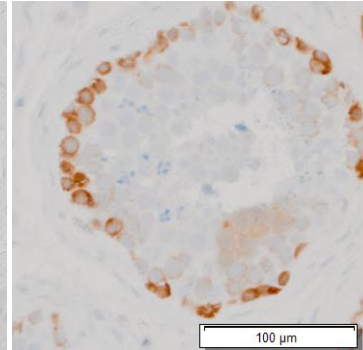

32. SSX

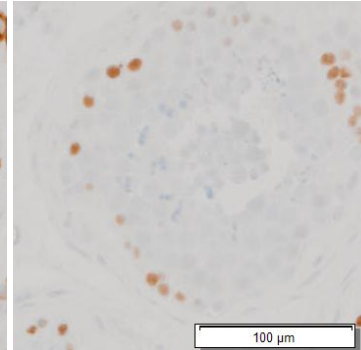

33. SAGE1

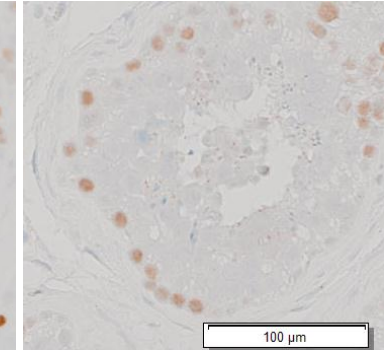



# Clone no. 1-1\_C32

**A**

| Clone no. | Location       | Slide 21 | Slide 22 | Slide 23 | Slide 24 | Slide 25 | Slide 26 | Slide 27 | Slide 28 | Slide 29 | Slide 30 | Slide 31 | Minimum number of cells |
|-----------|----------------|----------|----------|----------|----------|----------|----------|----------|----------|----------|----------|----------|-------------------------|
|           |                | MAGEA4   | SSX      | MAGEA4   | Ki67     | H&E      | MAGEA4   | OCT2     | MAGEA4   | FGFR3    | Ki67     | MAGEA4   |                         |
| 1-1_C32   | Near Periphery | 0        | 0        | 1        |          |          | 1        | 0        | 1        | 0        | 0        | 0        | 40                      |
|           |                |          |          | 7 cells  | 30 µm    |          |          | 6 cells  | 7 cells  |          |          |          |                         |

**B**

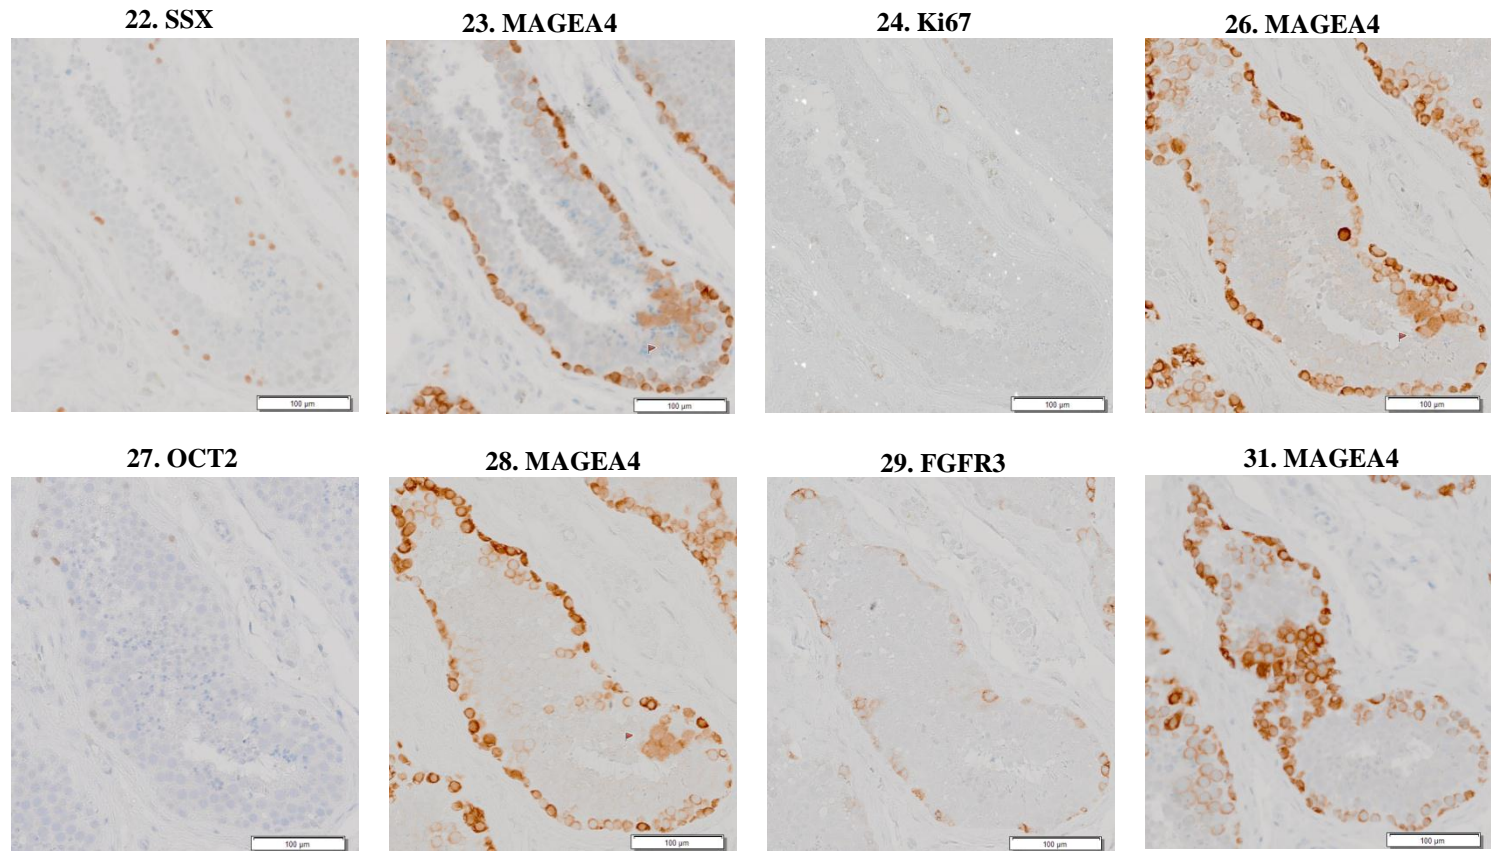

# Clone no. 1-1\_C33

**A**

| Clone no. | Location | Slide 23 | Slide 24 | Slide 25 | Slide 26     | Slide 27 | Slide 28      | Slide 29     | Slide 30 | Slide 31     | Slide 32 | Slide 33 | Minimum number of cells |
|-----------|----------|----------|----------|----------|--------------|----------|---------------|--------------|----------|--------------|----------|----------|-------------------------|
|           |          | MAGEA4   | Ki67     | n.s.     | MAGEA4       | OCT2     | MAGEA4        | FGFR3        | Ki67     | MAGEA4       | SSX      | SAGE1    |                         |
| 1-1_C33   | Centre   | NA       | 0        |          | 1<br>8 cells | 0        | 1<br>10 cells | 1<br>3 cells | 0        | 1<br>8 cells | NA       | NA       | 53                      |
| 30 µm     |          |          |          |          |              |          |               |              |          |              |          |          |                         |

**B**

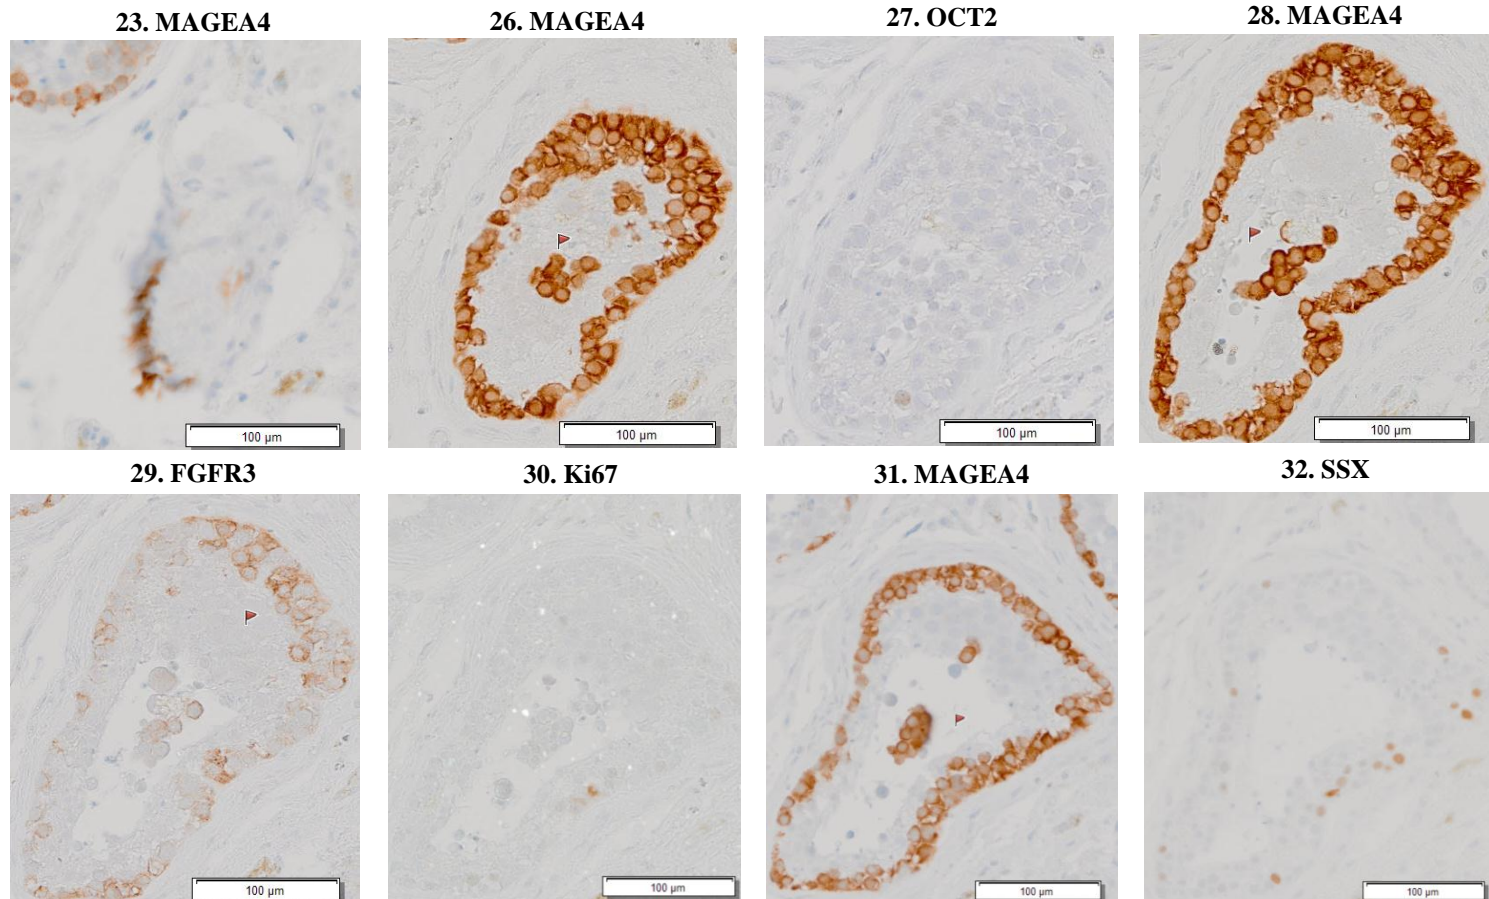

# Clone no. 1-

## 1-C34

**A**

| Clone no. | Location       | Slide 23 | Slide 24 | Slide 25 | Slide 26 | Slide 27 | Slide 28 | Slide 29 | Slide 30 | Slide 31 | Slide 32 | Slide 33 | Slide 34 | Slide 35 | Minimum number of cells |
|-----------|----------------|----------|----------|----------|----------|----------|----------|----------|----------|----------|----------|----------|----------|----------|-------------------------|
|           |                | MAGEA4   | Ki67     | H&E      | MAGEA4   | OCT2     | MAGEA4   | FGFR3    | Ki67     | MAGEA4   | SSX      | SAGE1    | OCT2     | MAGEA4   |                         |
| 1-1_C34   | Near Periphery | 0        |          |          | 0*       | 0        | 1        | 0        | 0        | 1        | 0        | 0        | 0        | 0*       | 51                      |
|           |                |          |          |          | 3 cells  |          | 5 cells  |          |          | 8 cells  |          |          |          | 2 cells  |                         |
| 50 µm     |                |          |          |          |          |          |          |          |          |          |          |          |          |          |                         |

**B**

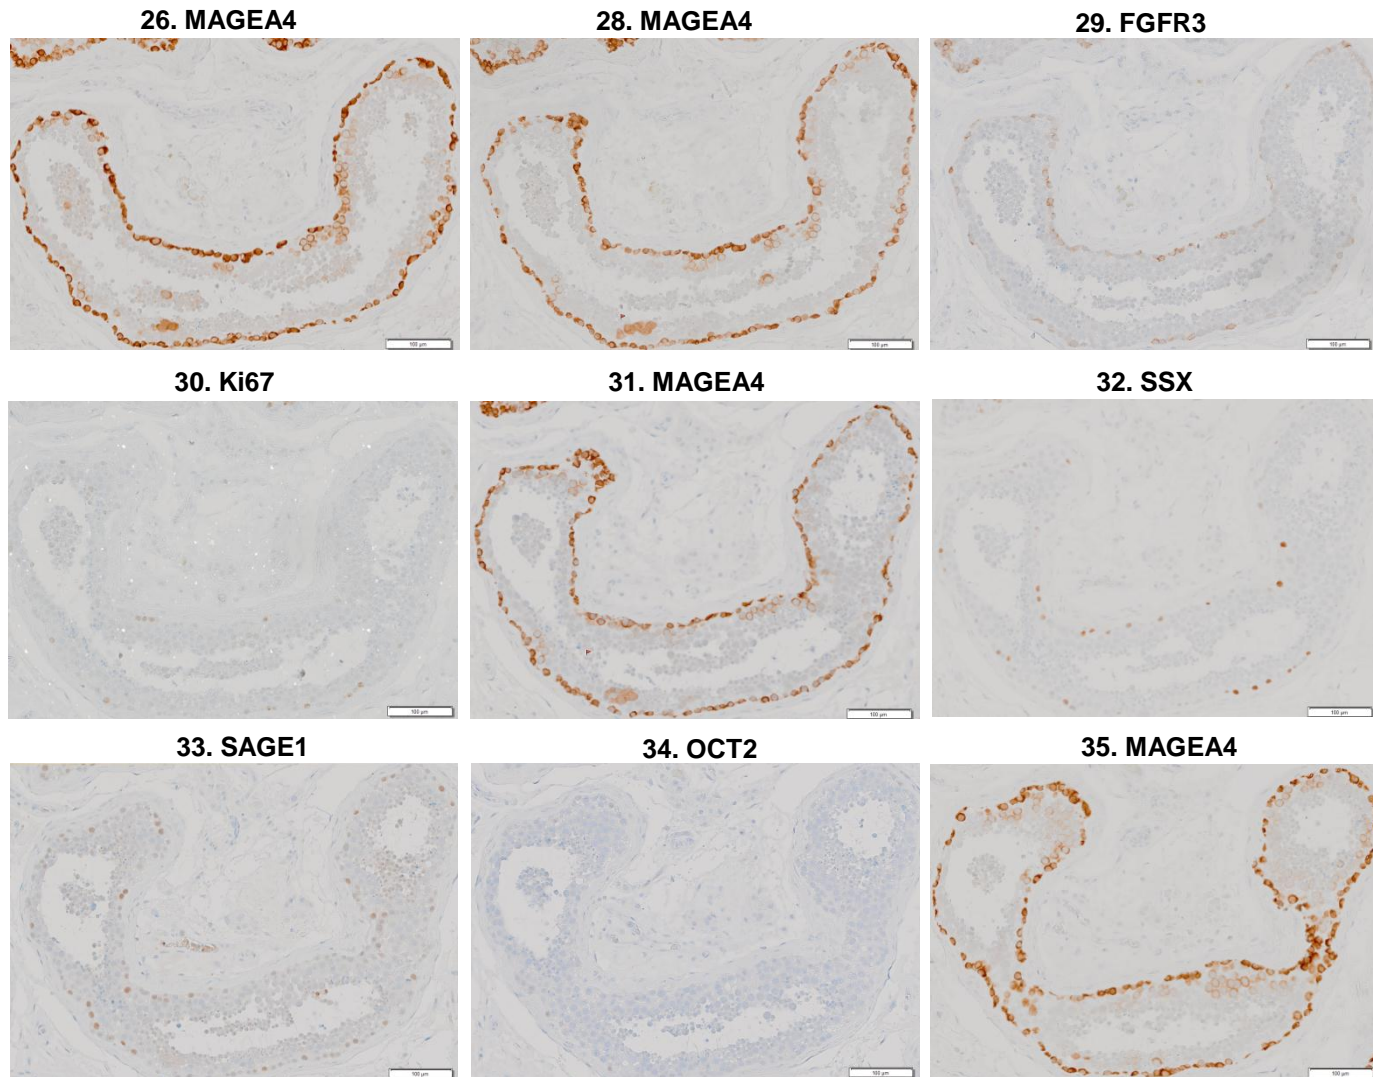

# Clone no. 1- 1 C35

**A**

| Clone no. | Location       | Slide 23 | Slide 24 | Slide 25 | Slide 26 | Slide 27 | Slide 28 | Slide 29 | Slide 30 | Slide 31 | Slide 32 | Slide 33 | Slide 34 | Slide 35 | Slide 36 | Slide 37 | Slide 38 | Slide 39 | Slide 40 | Slide 41 | Minimum number of cells |
|-----------|----------------|----------|----------|----------|----------|----------|----------|----------|----------|----------|----------|----------|----------|----------|----------|----------|----------|----------|----------|----------|-------------------------|
|           |                | MAGEA4   | Ki67     | H&E      | MAGEA4   | OCT2     | MAGEA4   | FGFR3    | Ki67     | MAGEA4   | SSX      | SAGE1    | OCT2     | MAGEA4   | n.s      | n.s      | n.s      | n.s      | n.s      | MAGEA4   |                         |
| 1-1_C35   | Near Periphery | 0*       |          |          | 0*       | 0        | 0*       | 0        | 0        | 1        | 0        | 0        | 0        | 1        |          |          |          |          |          | 0        | 72                      |
|           |                | 2 cells  |          | 3 cells  |          | 2 cells  |          | 12 cells |          | 5 cells  |          | 65 µm    |          |          |          |          |          |          |          |          |                         |

**B**

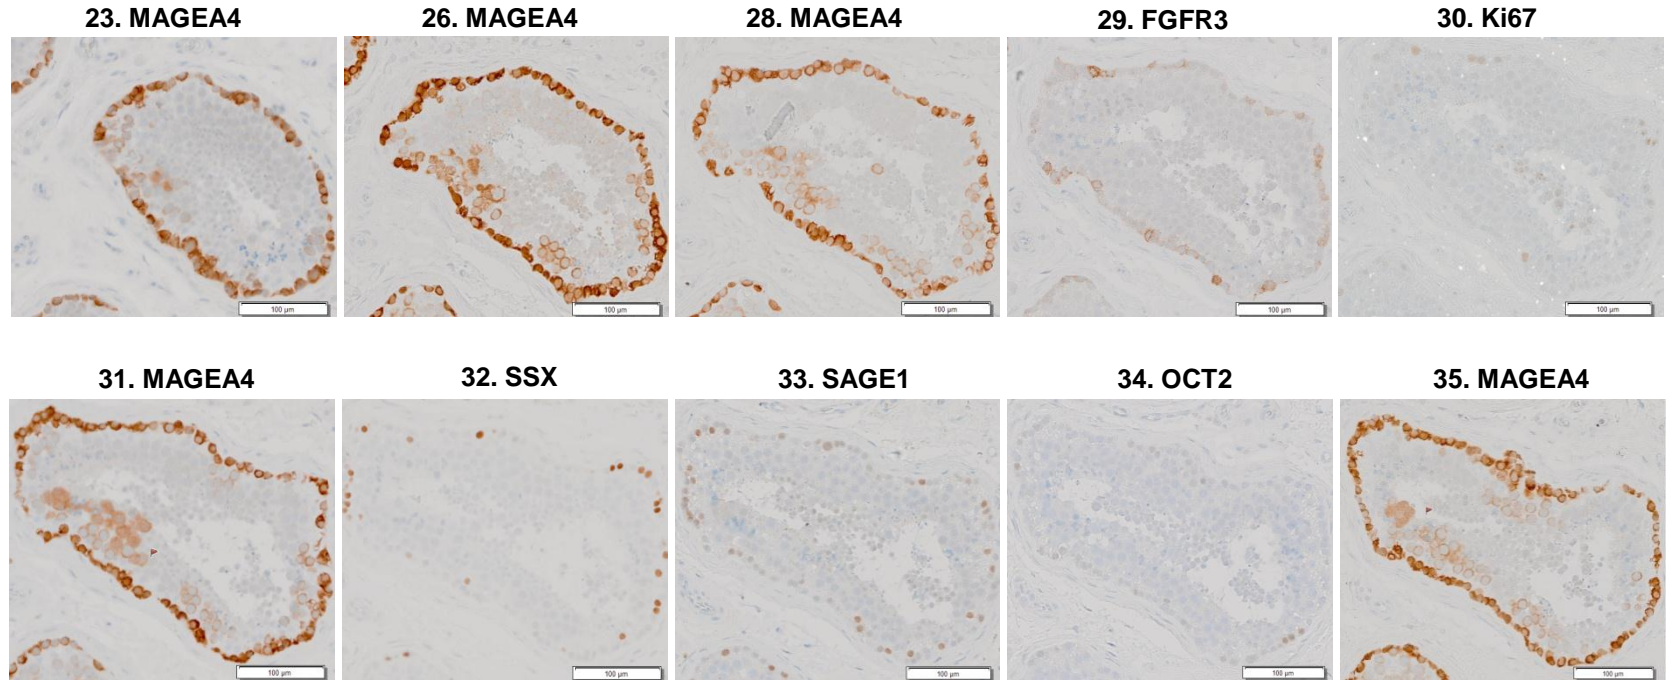

# Clone no. 1-1\_C36

**A**

| Clone no. | Location | Slide 26 | Slide 27 | Slide 28 | Slide 29 | Slide 30 | Slide 31 | Slide 32 | Slide 33 | Slide 34 | Slide 35 | Minimum number of cells |
|-----------|----------|----------|----------|----------|----------|----------|----------|----------|----------|----------|----------|-------------------------|
|           |          | MAGEA4   | OCT2     | MAGEA4   | FGFR3    | Ki67     | MAGEA4   | SSX      | SAGE1    | OCT2     | MAGEA4   |                         |
| 1-1_C36   | Centre   | 0*       | 0        | 1        | 0*       | 1        | 1        | 1        | 1        | 0        | 0        | 98                      |
|           |          | 4 cells  |          | 7 cells  | 1 cell   | 9 cells  | 21 cells | 17 cells | 15 cells |          |          |                         |
| 40 µm     |          |          |          |          |          |          |          |          |          |          |          |                         |

**B**

**26. MAGEA4**

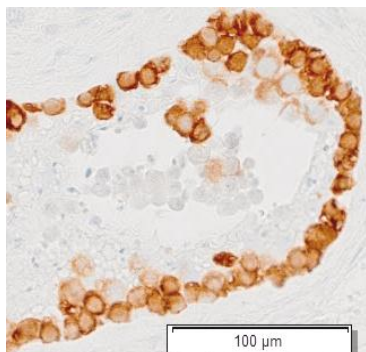

**27. OCT2**

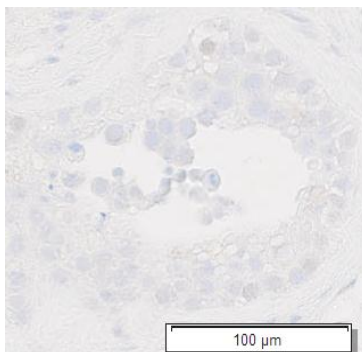

**28. MAGEA4**

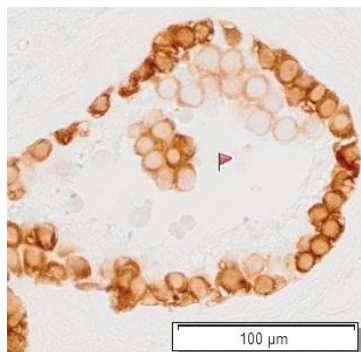

**29. FGFR3**

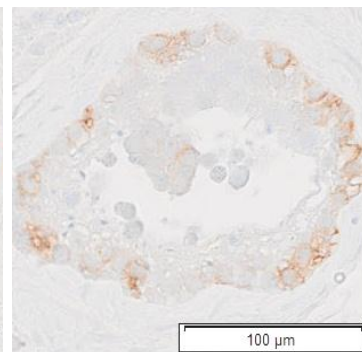

**30. Ki67**

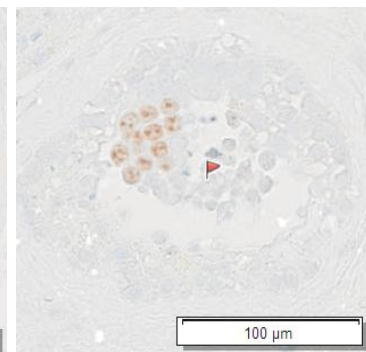

**31. MAGEA4**

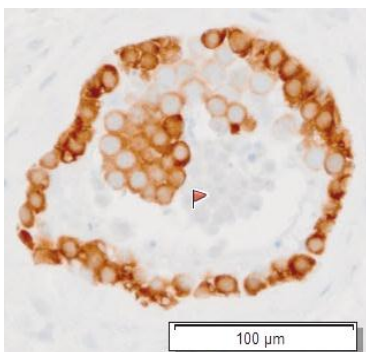

**32. SSX**

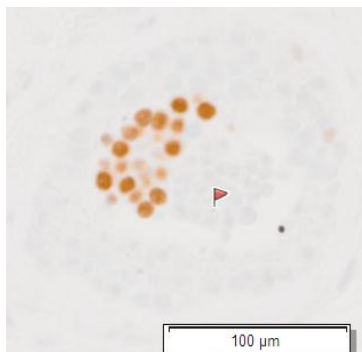

**33. SAGE1**

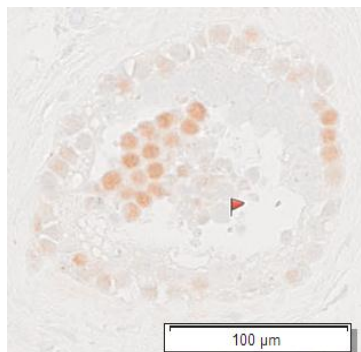

**34. OCT2**

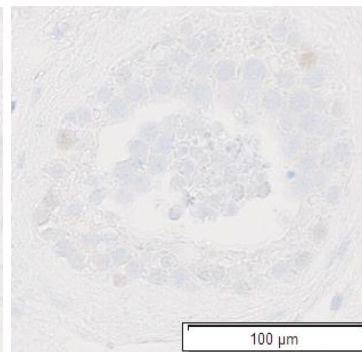

**35. MAGEA4**

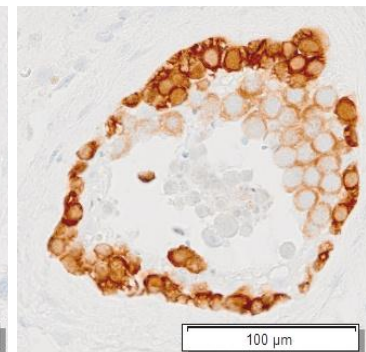

# Clone no. 1-1\_C37

**A**

| Clone no. | Location | Slide 26 | Slide 27 | Slide 28 | Slide 29 | Slide 30   | Slide 31 | Slide 32 | Slide 33 | Slide 34 | Slide 35 | Minimum number of cells |
|-----------|----------|----------|----------|----------|----------|------------|----------|----------|----------|----------|----------|-------------------------|
|           |          | MAGEA4   | OCT2     | MAGEA4   | FGFR3    | Ki67       | MAGEA4   | SSX      | SAGE1    | OCT2     | MAGEA4   |                         |
| 1-1_C37   | Centre   | 0        | 0        | 1        | 0*       | 0          | 1        | 0        | 1        | 0        | 0        | 55                      |
|           |          |          |          | 9 cells  | 2 cells  | 30 $\mu$ m |          |          |          | 3 cells  |          |                         |

**B**

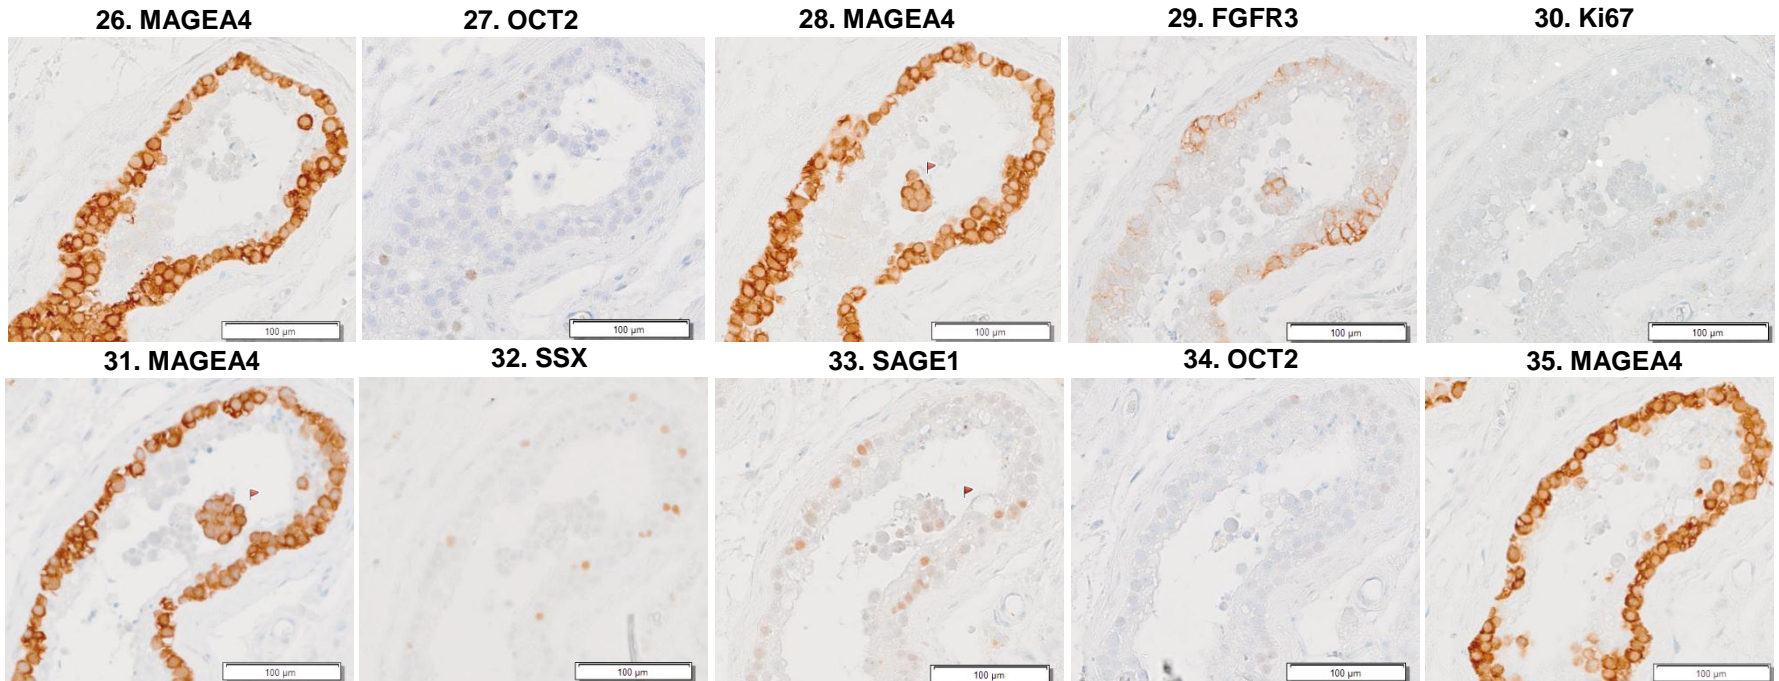

# Clone no. 1-1\_C38

**A**

| Clone no.  | Location       | Slide 26 | Slide 27 | Slide 28 | Slide 29 | Slide 30 | Slide 31 | Slide 32 | Slide 33 | Slide 34 | Slide 35 | Minimum number of cells |
|------------|----------------|----------|----------|----------|----------|----------|----------|----------|----------|----------|----------|-------------------------|
|            |                | MAGEA4   | OCT2     | MAGEA4   | FGFR3    | Ki67     | MAGEA4   | SSX      | SAGE1    | OCT2     | MAGEA4   |                         |
| 1-1_C38    | Near Periphery | 0*       | 0        | 1        | 0        | 0        | 1        | 0        | 0        | 0        | 0        | 28                      |
|            |                | 2 cells  |          | 6 cells  |          |          | 5 cells  |          |          |          |          |                         |
| 30 $\mu$ m |                |          |          |          |          |          |          |          |          |          |          |                         |

**B**

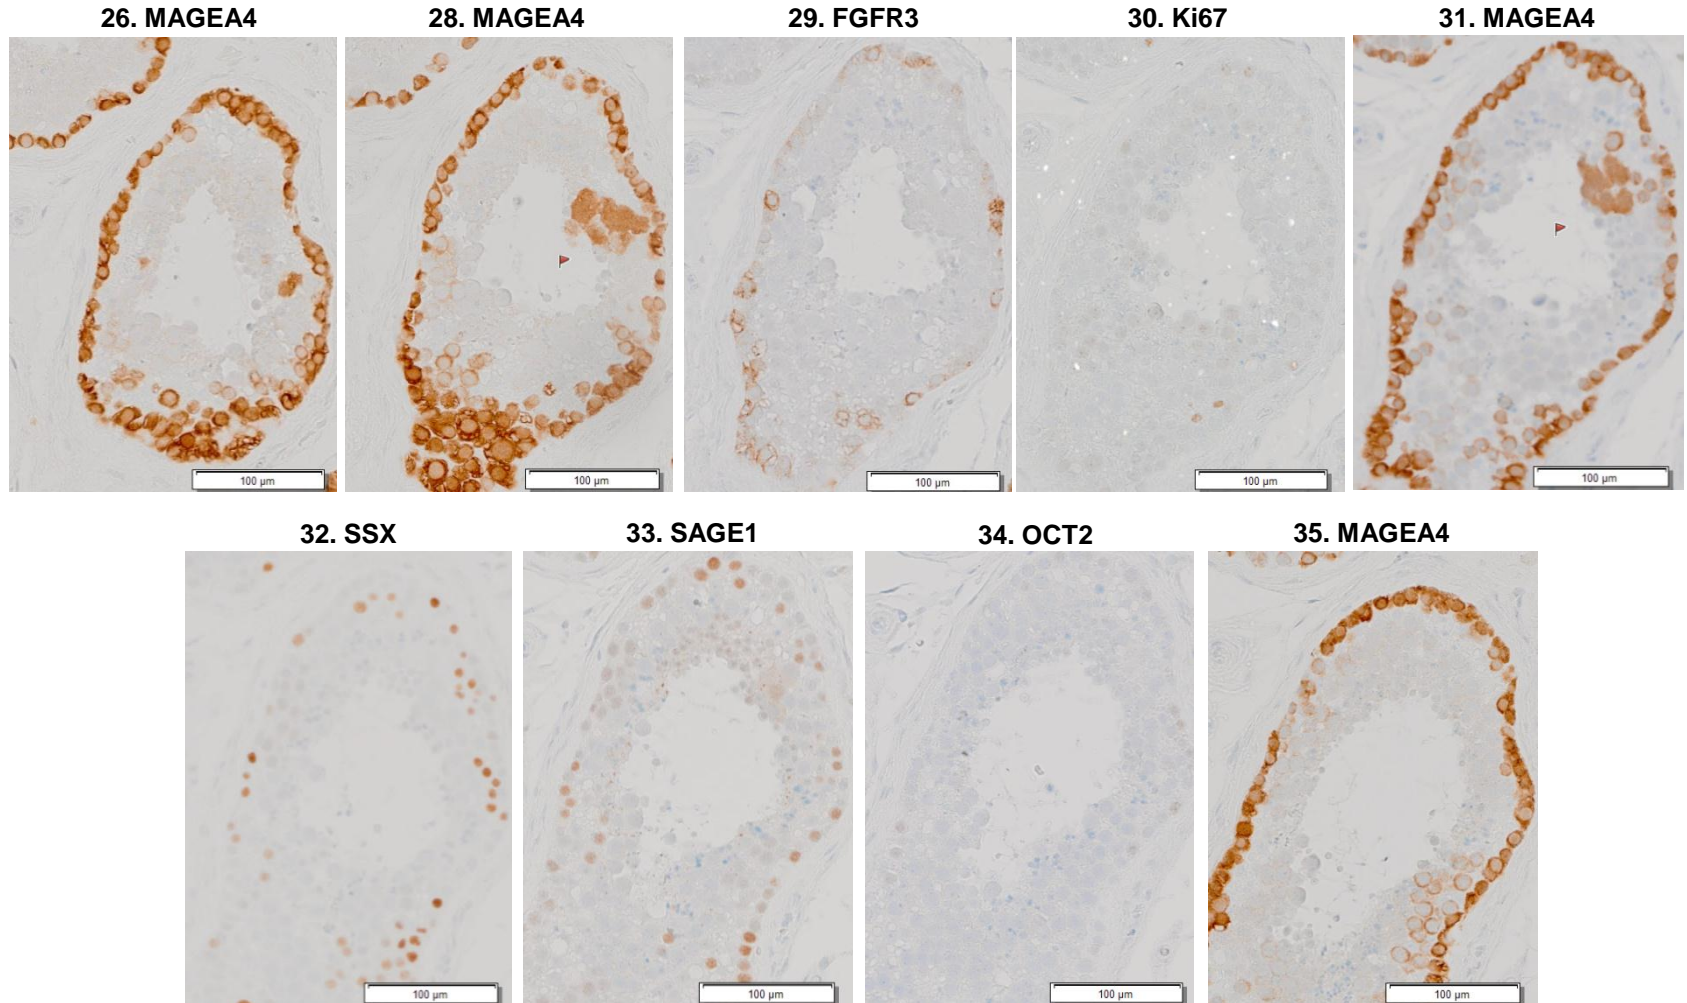

# Clone no. 1-1\_C39

**A**

| Clone no. | Location  | Slide 28 | Slide 29 | Slide 30 | Slide 31 | Slide 32 | Slide 33 | Slide 34 | Slide 35 | Minimum number of cells |
|-----------|-----------|----------|----------|----------|----------|----------|----------|----------|----------|-------------------------|
|           |           | MAGEA4   | FGFR3    | Ki67     | MAGEA4   | SSX      | SAGE1    | OCT2     | MAGEA4   |                         |
| 1-1_C39   | Periphery | 0        | 0        | 0        | 0        | 1        | 1        | 0        | NA       | 35                      |
|           |           |          |          |          |          | 18 cells | 17 cells |          |          |                         |
|           |           | 10 μm    |          |          |          |          |          |          |          |                         |

**B**

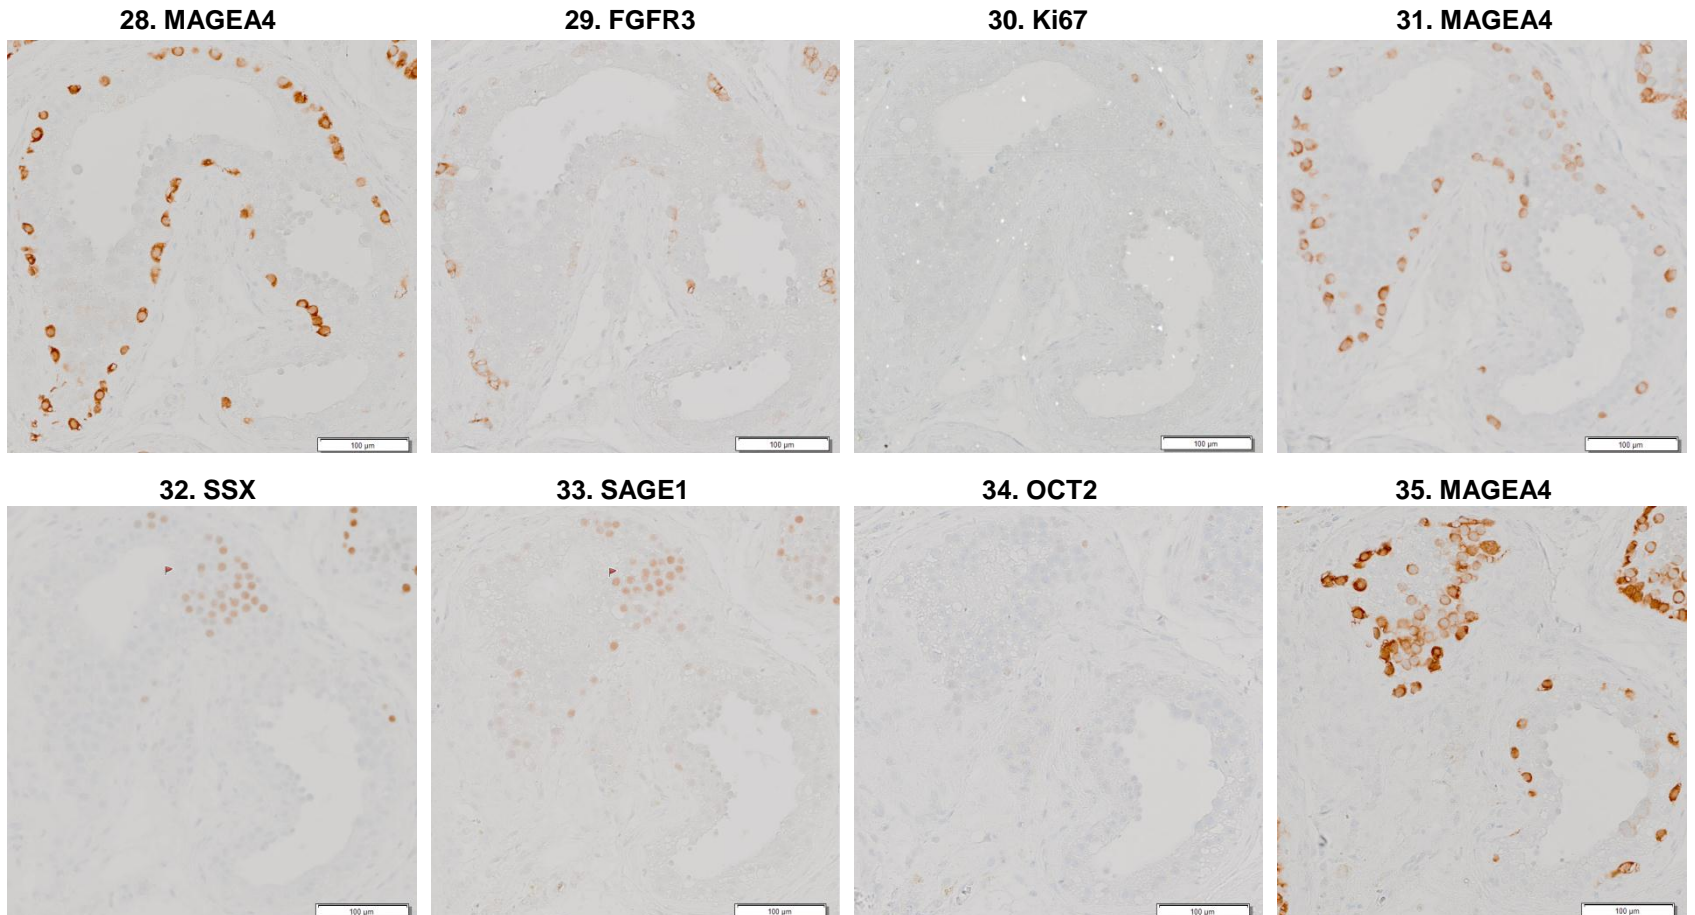



# Clone no. 1-1\_C40

**A**

| Clone no. | Location  | Slide 28 | Slide 29 | Slide 30 | Slide 31 | Slide 32 | Slide 33 | Slide 34 | Slide 35 | Sldie 36 | Sldie 37 | Sldie 38 | Sldie 39 | Sldie 40 | Slide 41 | Minimum number of cells |
|-----------|-----------|----------|----------|----------|----------|----------|----------|----------|----------|----------|----------|----------|----------|----------|----------|-------------------------|
|           |           | MAGEA4   | FGFR3    | Ki67     | MAGEA4   | SSX      | SAGE1    | OCT2     | MAGEA4   | n.s      | n.s      | n.s      | n.s      | n.s      | MAGEA4   |                         |
| 1-1_C40   | Periphery | 0        | 0*       | 0        | 0*       | 1        | 1        | 0        | 1        |          |          |          |          |          | 0        | 124                     |
|           |           |          | 14 cells |          | 15 cells | 38 cells | 20 cells |          | 23 cells | 35 µm    |          |          |          |          |          |                         |

**B**

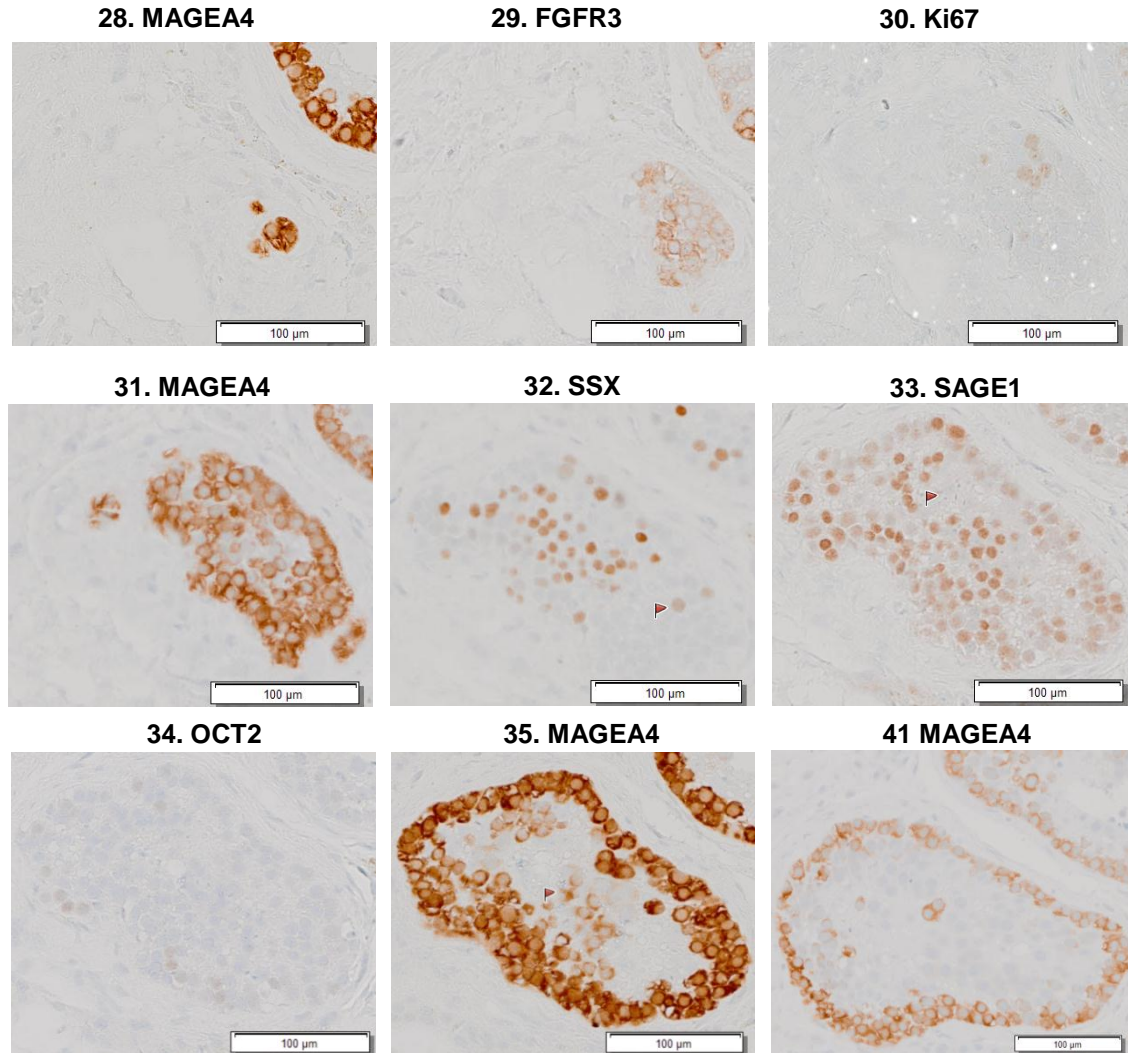

# Clone no. 1-1\_C41

**A**

| Clone no. | Location | Slide 29 | Slide 30 | Slide 31 | Slide 32 | Slide 33 | Slide 34 | Minimum number of cells |
|-----------|----------|----------|----------|----------|----------|----------|----------|-------------------------|
|           |          | FGFR3    | Ki67     | MAGEA4   | SSX      | SAGE1    | OCT2     |                         |
| 1-1_C41   | Centre   | 0        | 0        | 0        | 1        | 1        | 0        | 24                      |
|           |          |          |          |          | 10 cells | 14 cells |          |                         |
|           |          |          |          |          |          |          | 10 µm    |                         |

**B**

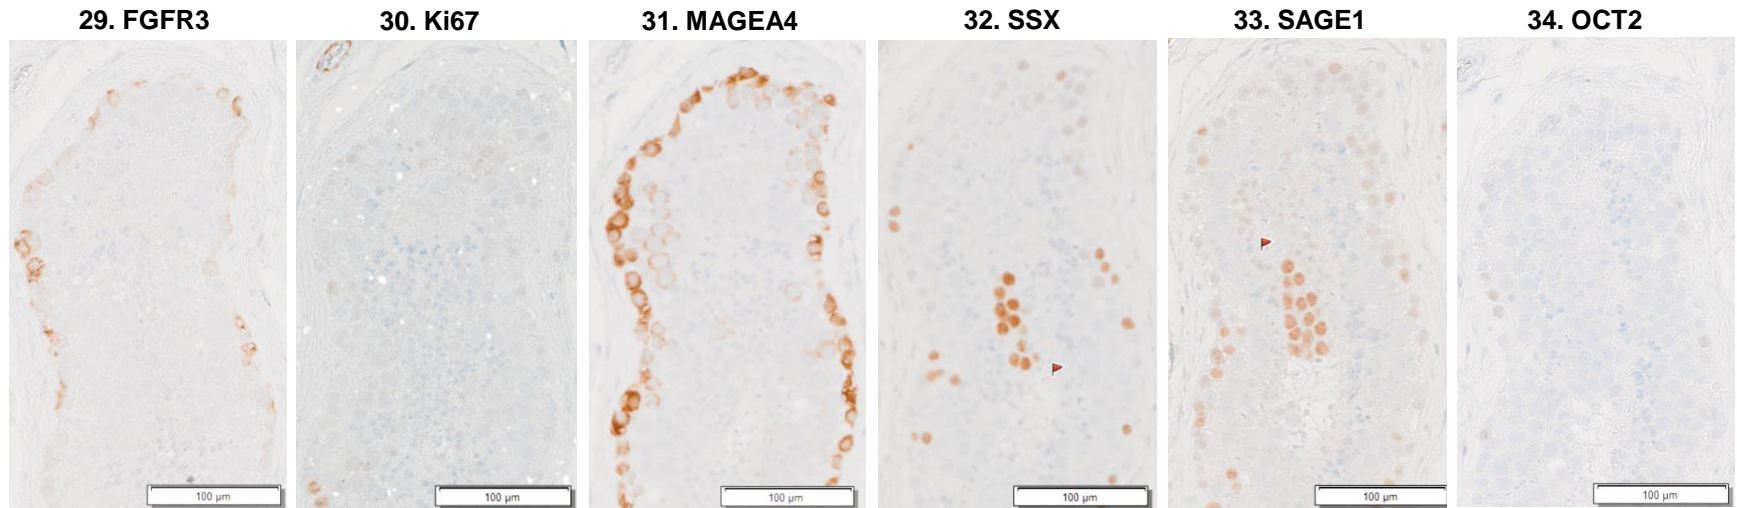

# Clone no. 1-1\_C42

**A**

| Clone no.  | Location       | Slide 28 | Slide 29 | Slide 30 | Slide 31 | Slide 32 | Slide 33 | Slide 34 | Slide 35 | Slide 36 | Slide 37 | Slide 38 | Slide 39 | Slide 40 | Slide 41 | Minimum number of cells |
|------------|----------------|----------|----------|----------|----------|----------|----------|----------|----------|----------|----------|----------|----------|----------|----------|-------------------------|
|            |                | MAGEA4   | FGFR3    | Ki67     | MAGEA4   | SSX      | SAGE1    | OCT2     | MAGEA4   | n.s      | n.s      | n.s      | n.s      | n.s      | MAGEA4   |                         |
| 1-1_C42    | Near Periphery | 0        | 0        | 0        | 1        | 0        | 0        | 0        | 1        |          |          |          |          |          | 0*       | 49                      |
|            |                |          |          |          | 3 cells  |          |          |          | 4 cells  |          |          |          |          |          | 6 cells  |                         |
| 55 $\mu$ m |                |          |          |          |          |          |          |          |          |          |          |          |          |          |          |                         |

**B**

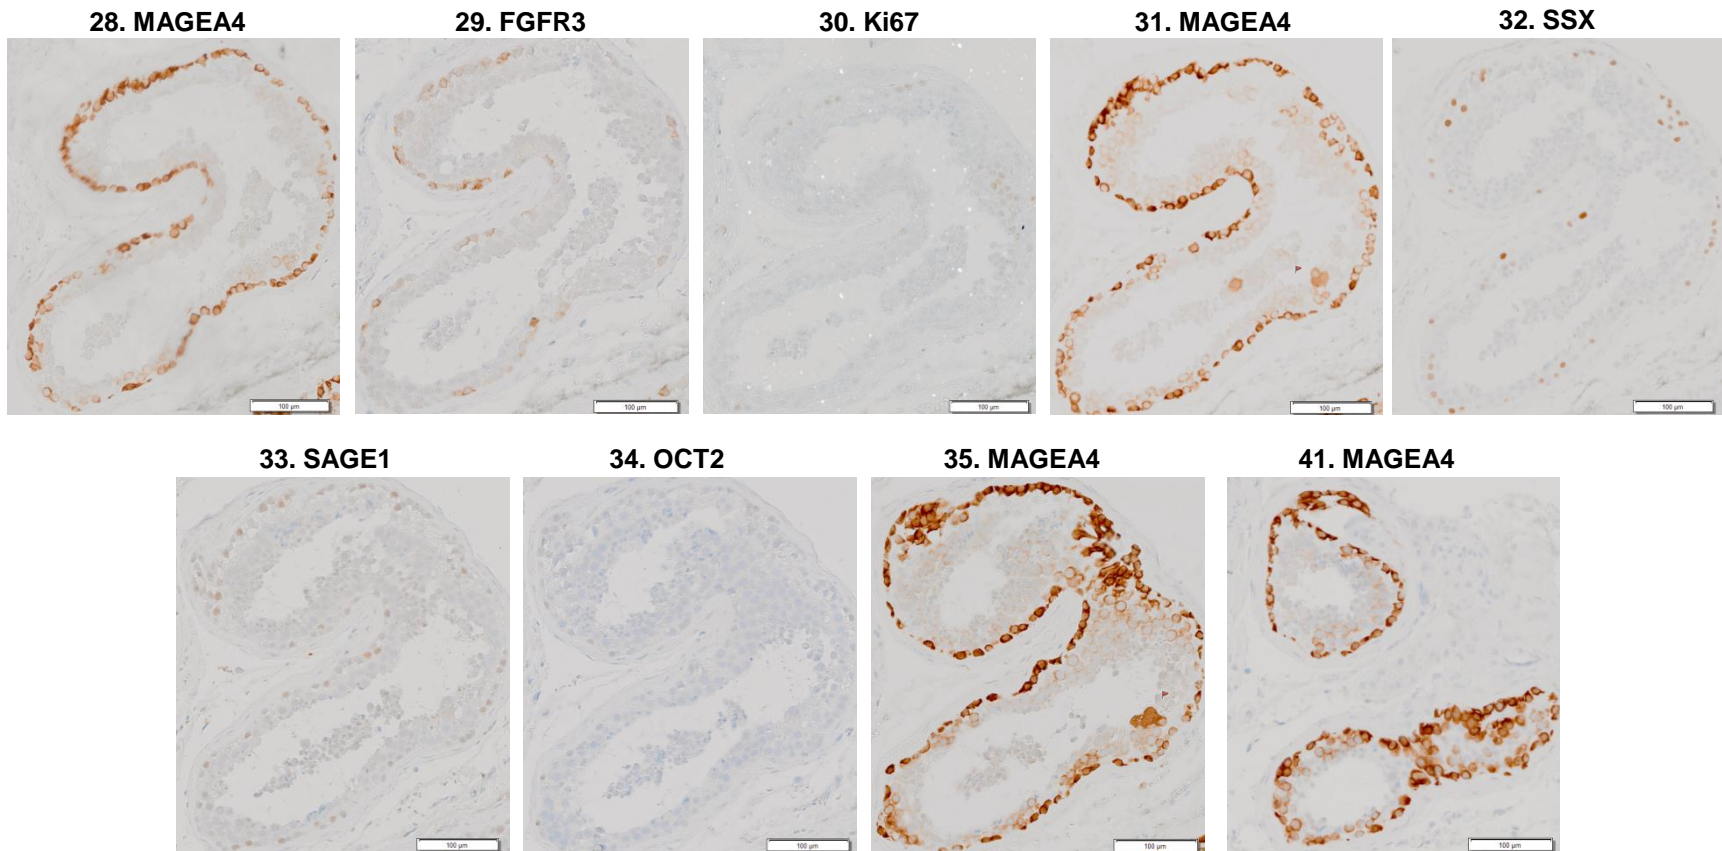

# Clone no. 1-1\_C43

**A**

| Clone no. | Location       | Slide 31 | Slide 32 | Slide 33 | Slide 34 | Slide 35 | Slide 36   | Slide 37 | Slide 38 | Slide 39 | Slide 40 | Slide 41 | Minimum number of cells |
|-----------|----------------|----------|----------|----------|----------|----------|------------|----------|----------|----------|----------|----------|-------------------------|
|           |                | MAGEA4   | SSX      | SAGE1    | OCT2     | MAGEA4   | n.s        | n.s      | n.s      | n.s      | n.s      | MAGEA4   |                         |
| 1-1_C43   | Near Periphery | 0        | 0        | 0        | 0        | 1        |            |          |          |          |          | 1        | 42                      |
|           |                |          |          |          |          | 7 cells  | 35 $\mu$ m |          |          |          |          |          |                         |

**B**

**31. MAGEA4**

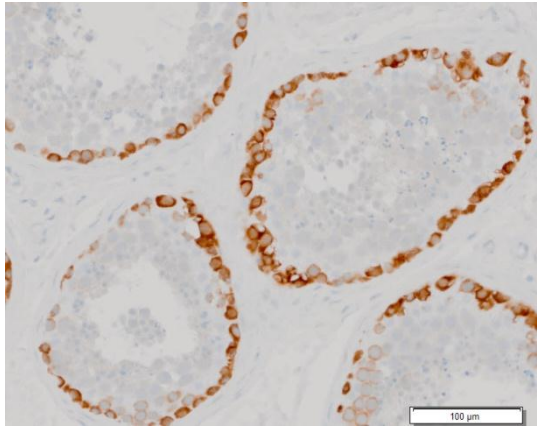

**32. SSX**

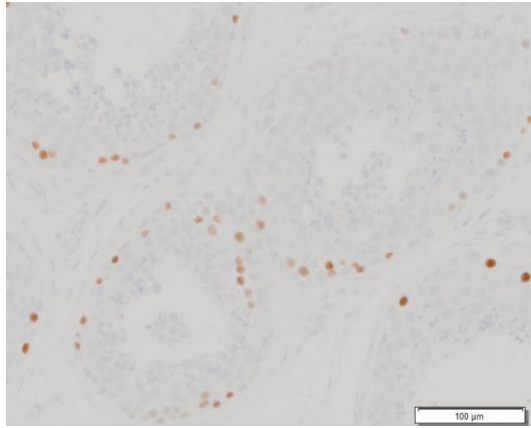

**33. SAGE1**

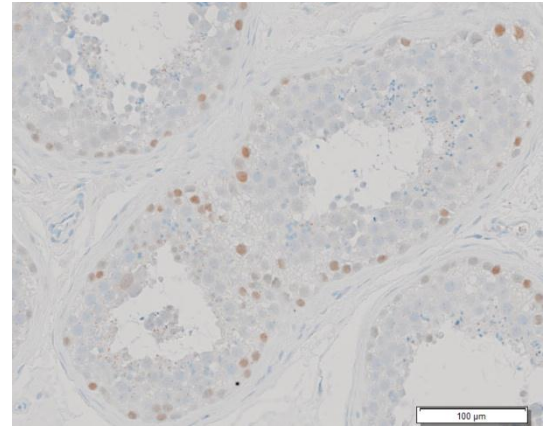

**34. OCT2**

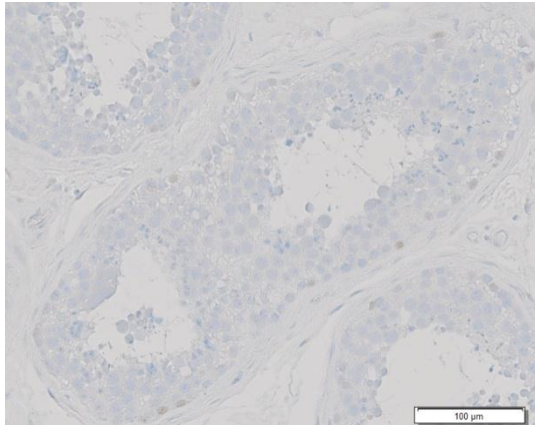

**35. MAGEA4**

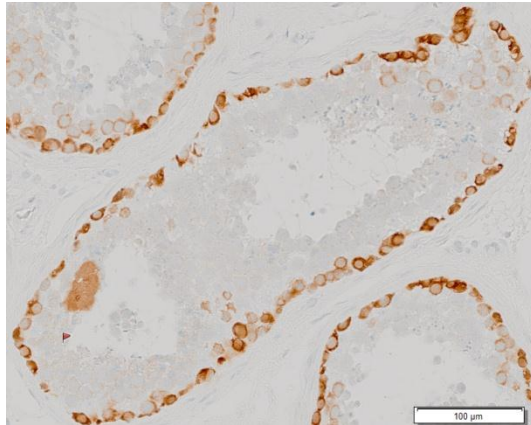

**41. MAGEA4**

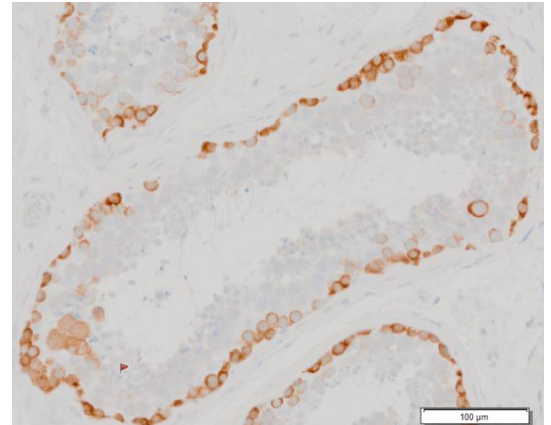

# Clone no. 1-1\_C44

**A**

| Clone no. | Location       | Slide 23 | Slide 24 | Slide 25 | Slide 26 | Slide 27 | Slide 28 | Slide 29 | Slide 30 | Slide 31 | Slide 32 | Slide 33 | Slide 34 | Slide 35 | Slide 36 | Slide 37 | Slide 38 | Slide 39 | Slide 40 | Slide 41 | Minimum number of cells |     |
|-----------|----------------|----------|----------|----------|----------|----------|----------|----------|----------|----------|----------|----------|----------|----------|----------|----------|----------|----------|----------|----------|-------------------------|-----|
|           |                | MAGEA4   | Ki67     | H&E      | MAGEA4   | OCT2     | MAGEA4   | FGFR3    | Ki67     | MAGEA4   | SSX      | SAGE1    | OCT2     | MAGEA4   | n.s.     | n.s.     | n.s.     | n.s.     | n.s.     | MAGEA4   |                         |     |
| 1-1_C44   | Near Periphery | NA       |          |          | 0*       | 0        | 0*       | 0        | 0        | 1        | 0        | 0        | 0        | 1        |          |          |          |          |          |          | 1                       | 187 |
|           |                |          |          |          | 2 cells  |          | 3 cells  |          |          | 10 cells |          |          |          | 21 cells |          |          |          |          |          | 10 cells |                         |     |
| 80 µm     |                |          |          |          |          |          |          |          |          |          |          |          |          |          |          |          |          |          |          |          |                         |     |

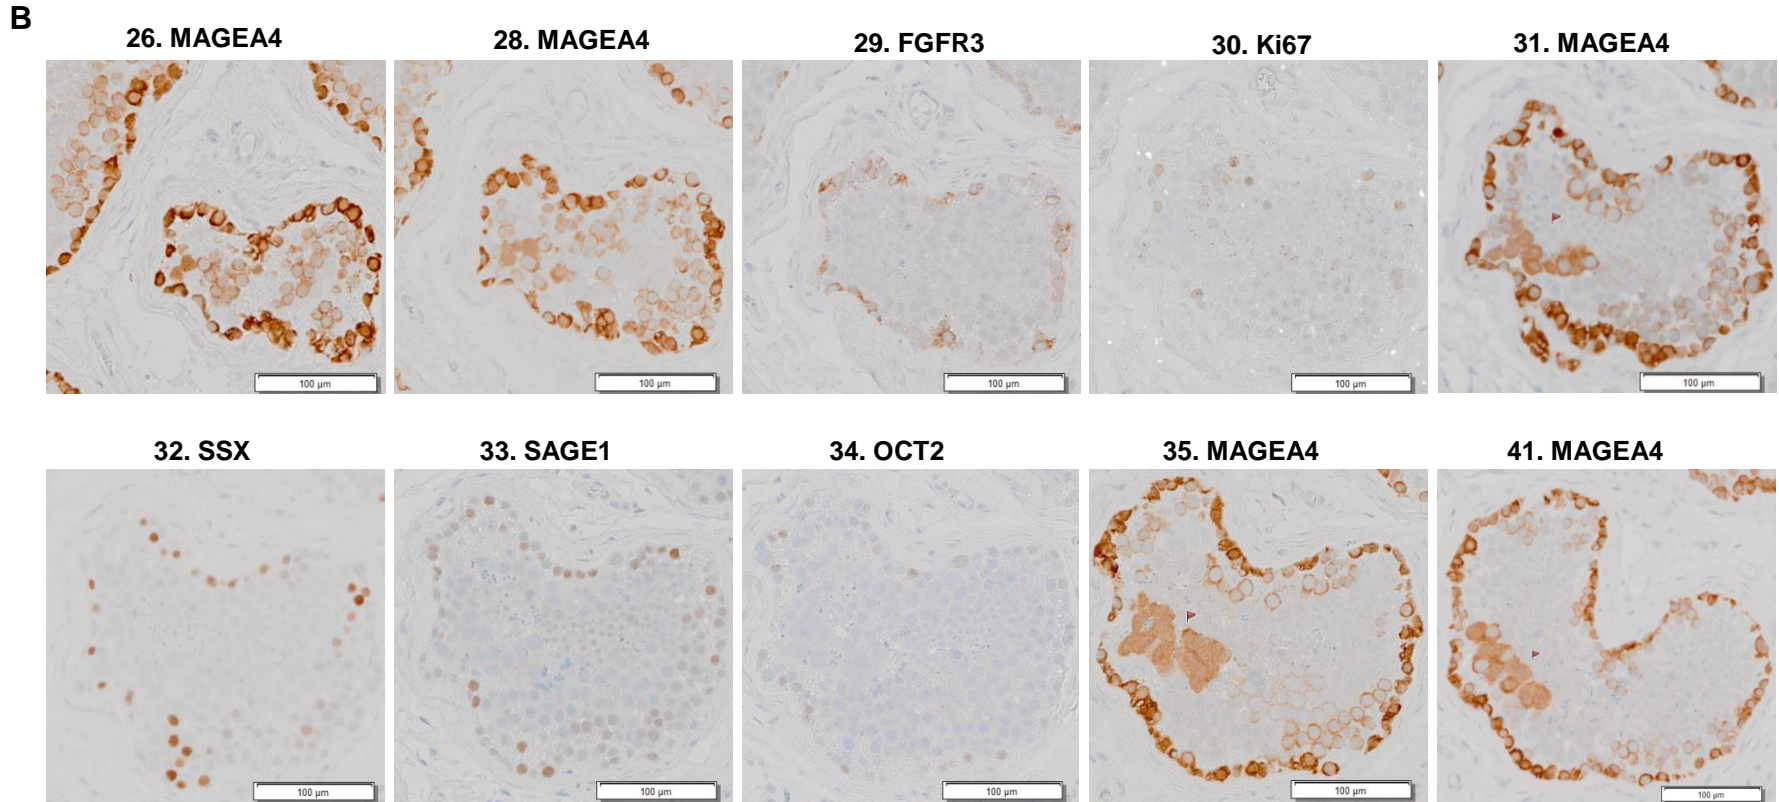

# Clone no. 1-1\_C45

**A**

| Clone no. | Location | Slide 31 | Slide 32 | Slide 33 | Slide 34 | Slide 35 | Slide 36   | Slide 37 | Slide 38 | Slide 39 | Slide 40 | Slide 41 | Minimum number of cells |
|-----------|----------|----------|----------|----------|----------|----------|------------|----------|----------|----------|----------|----------|-------------------------|
|           |          | MAGEA4   | SSX      | SAGE1    | OCT2     | MAGEA4   | n.s        | n.s      | n.s      | n.s      | n.s      | MAGEA4   |                         |
| 1-1_C45   | Centre   | 0        | 0        | 1        | 0        | 1        |            |          |          |          |          | 1        | 72                      |
|           |          |          |          | 4 cells  |          | 12 cells | 45 $\mu$ m |          |          |          |          |          |                         |

**B**

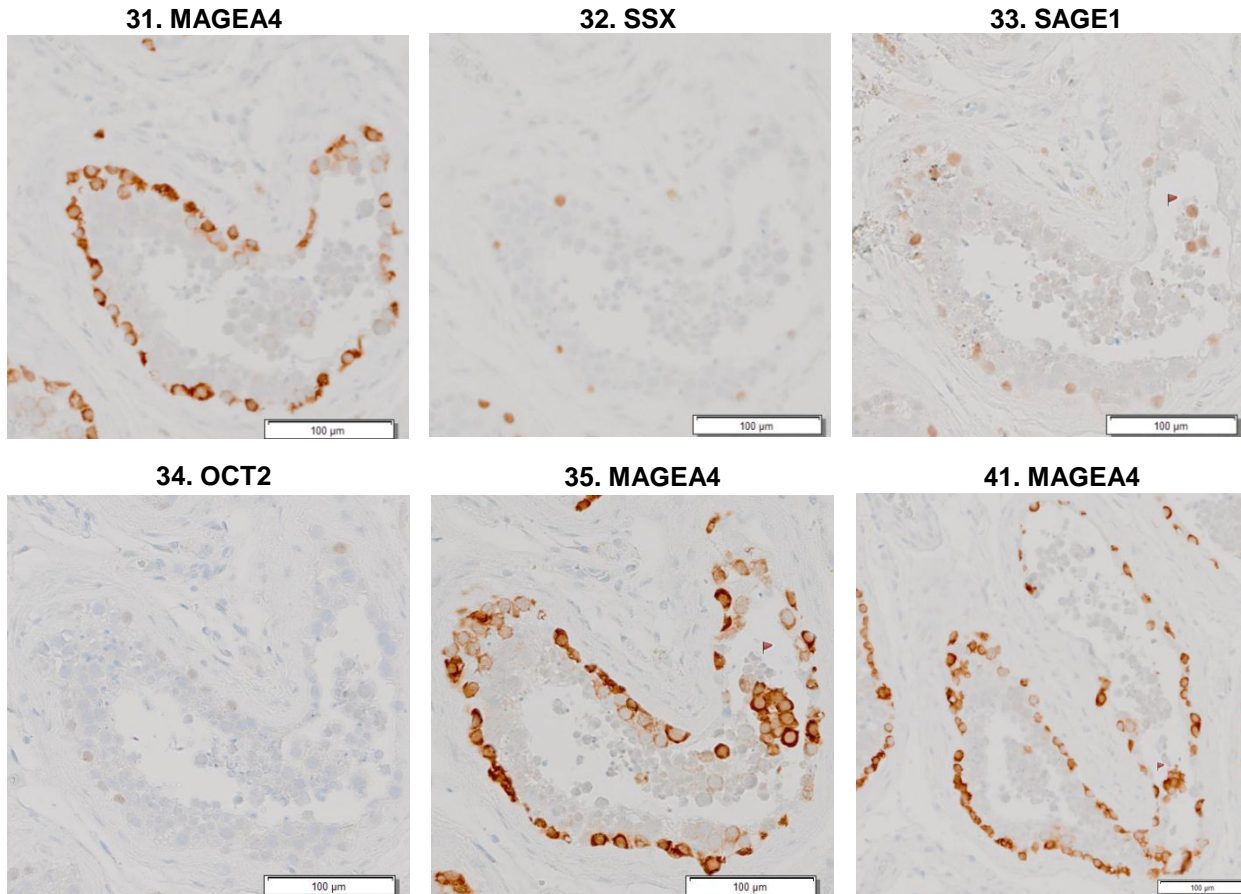

# Clone no. 1-2\_C1

**A**

| Clone no. | Location | Slide 168     | Slide 169 | Slide 170 | Slide 171     | Slide 172 | Slide 173 | Slide 174 | Slide 175     | Slide 176 | Slide 177 | Slide 178     | Slide 179 | Slide 180 | Slide 181 | Minimum number of cells |
|-----------|----------|---------------|-----------|-----------|---------------|-----------|-----------|-----------|---------------|-----------|-----------|---------------|-----------|-----------|-----------|-------------------------|
|           |          | MAGEA4        | FGFR3     | Ki67      | MAGEA4        | SSX       | SAGE1     | OCT2      | MAGEA4        | n.s.      | OCT2      | MAGEA4        | FGFR3     | Ki67      | MAGEA4    |                         |
| 1-2_C1    | Centre   | 1<br>20 cells | 0         | 0         | 1<br>22 cells | 0         | 0         | 0         | 1<br>15 cells |           |           | 0*<br>5 cells |           |           | 0         | 180                     |
| 55 µm     |          |               |           |           |               |           |           |           |               |           |           |               |           |           |           |                         |

**B**

168. MAGEA4

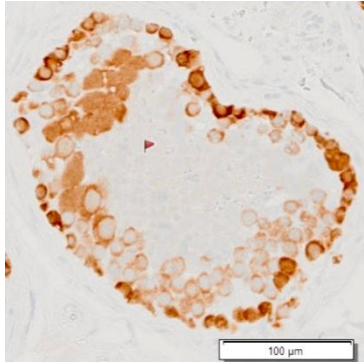

169. FGFR3

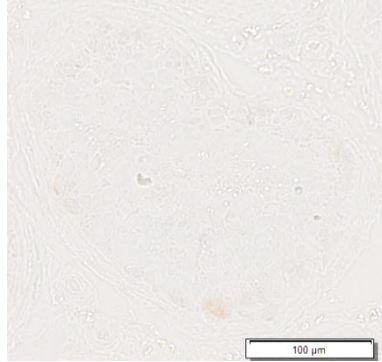

170. Ki67

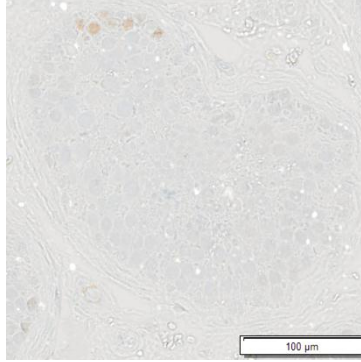

171. MAGEA4

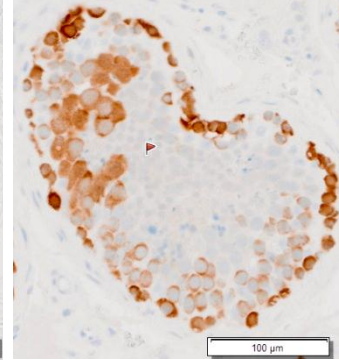

172. SSX

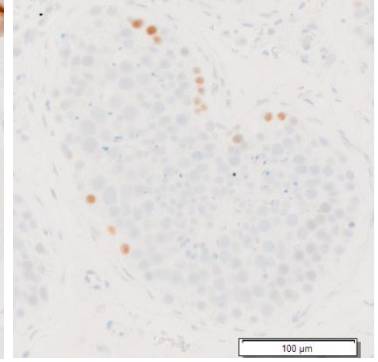

173. SAGE1

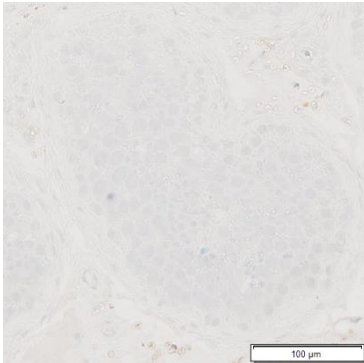

174. OCT2

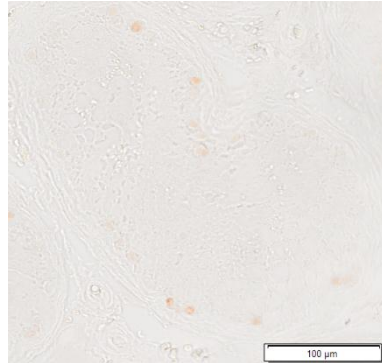

175. MAGEA4

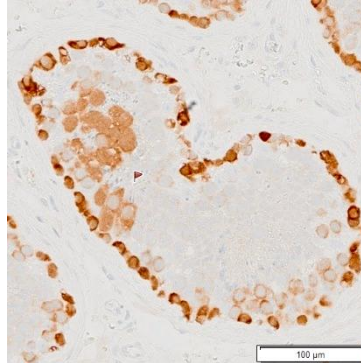

178. MAGEA4

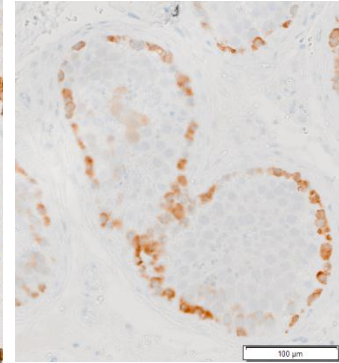

181. MAGEA4

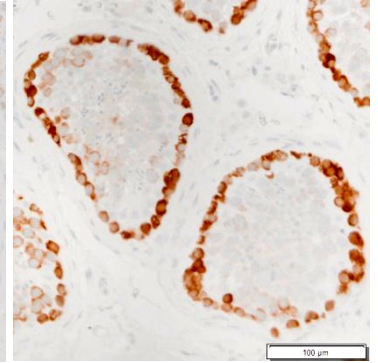

100 µm

# Clone no. 1-2\_C2

**A**

| Clone no. | Location       | Slide 168    | Slide 169 | Slide 170 | Slide 171    | Slide 172 | Slide 173 | Slide 174 | Slide 175    | Slide 176 | Slide 177 | Slide 178    | Slide 179 | Slide 180 | Slide 181 | Minimum number of cells |
|-----------|----------------|--------------|-----------|-----------|--------------|-----------|-----------|-----------|--------------|-----------|-----------|--------------|-----------|-----------|-----------|-------------------------|
|           |                | MAGEA4       | FGFR3     | Ki67      | MAGEA4       | SSX       | SAGE1     | OCT2      | MAGEA4       | n.s       | OCT2      | MAGEA4       | FGFR3     | Ki67      | MAGEA4    |                         |
| 1-2_C2    | Near Periphery | 1<br>9 cells | 0         | NA        | 1<br>6 cells | 0         | 0         | 0         | 1<br>3 cells |           |           | 1<br>4 cells |           |           | 0         | 58                      |
| 55 µm     |                |              |           |           |              |           |           |           |              |           |           |              |           |           |           |                         |

**B**

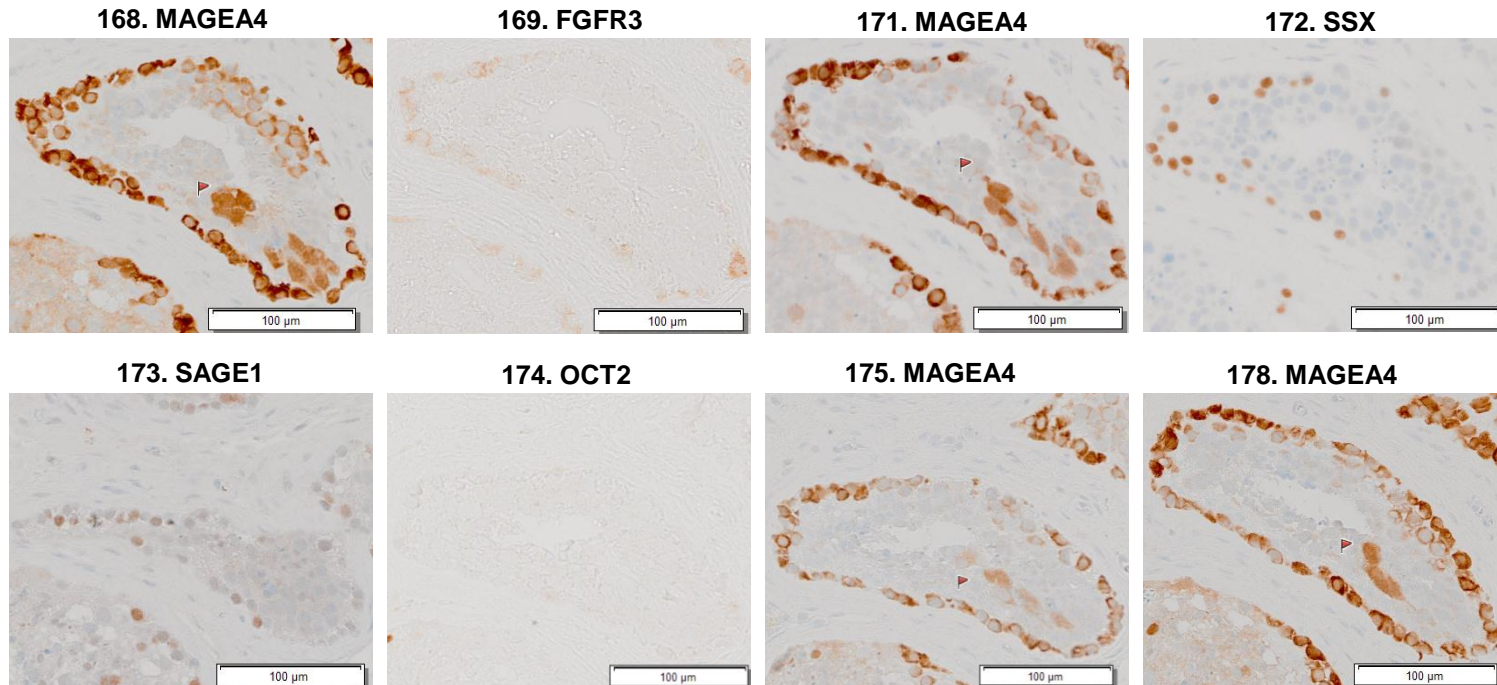



# Clone no. 1-2\_C3

**A**

| Clone no. | Location | Slide 168 | Slide 169 | Slide 170 | Slide 171 | Slide 172 | Slide 173 | Slide 174 | Slide 175 | Slide 176 | Slide 177 | Slide 178 | Slide 179 | Slide 180 | Slide 181 | Slide 182 | Slide 183 | Slide 184 | Slide 185 | Minimum number of cells |
|-----------|----------|-----------|-----------|-----------|-----------|-----------|-----------|-----------|-----------|-----------|-----------|-----------|-----------|-----------|-----------|-----------|-----------|-----------|-----------|-------------------------|
|           |          | MAGEA4    | FGFR3     | Ki67      | MAGEA4    | SSX       | SAGE1     | OCT2      | MAGEA4    | n.s       | OCT2      | MAGEA4    | FGFR3     | Ki67      | MAGEA4    | SSX       | FGFR3     | n.s       | MAGEA4    |                         |
| 1-2_C3    | Centre   | 1         | 0         | 0         | 1         | 0         | 0         | 0         | 1         |           |           | 1         |           |           | 0*        |           |           |           | 0         | 87                      |
|           |          | 5 cells   |           |           | 7 cells   |           |           |           | 6 cells   |           |           | 7 cells   |           |           | 5 cells   |           |           |           |           |                         |
|           |          | 70 µm     |           |           |           |           |           |           |           |           |           |           |           |           |           |           |           |           |           |                         |

**B**

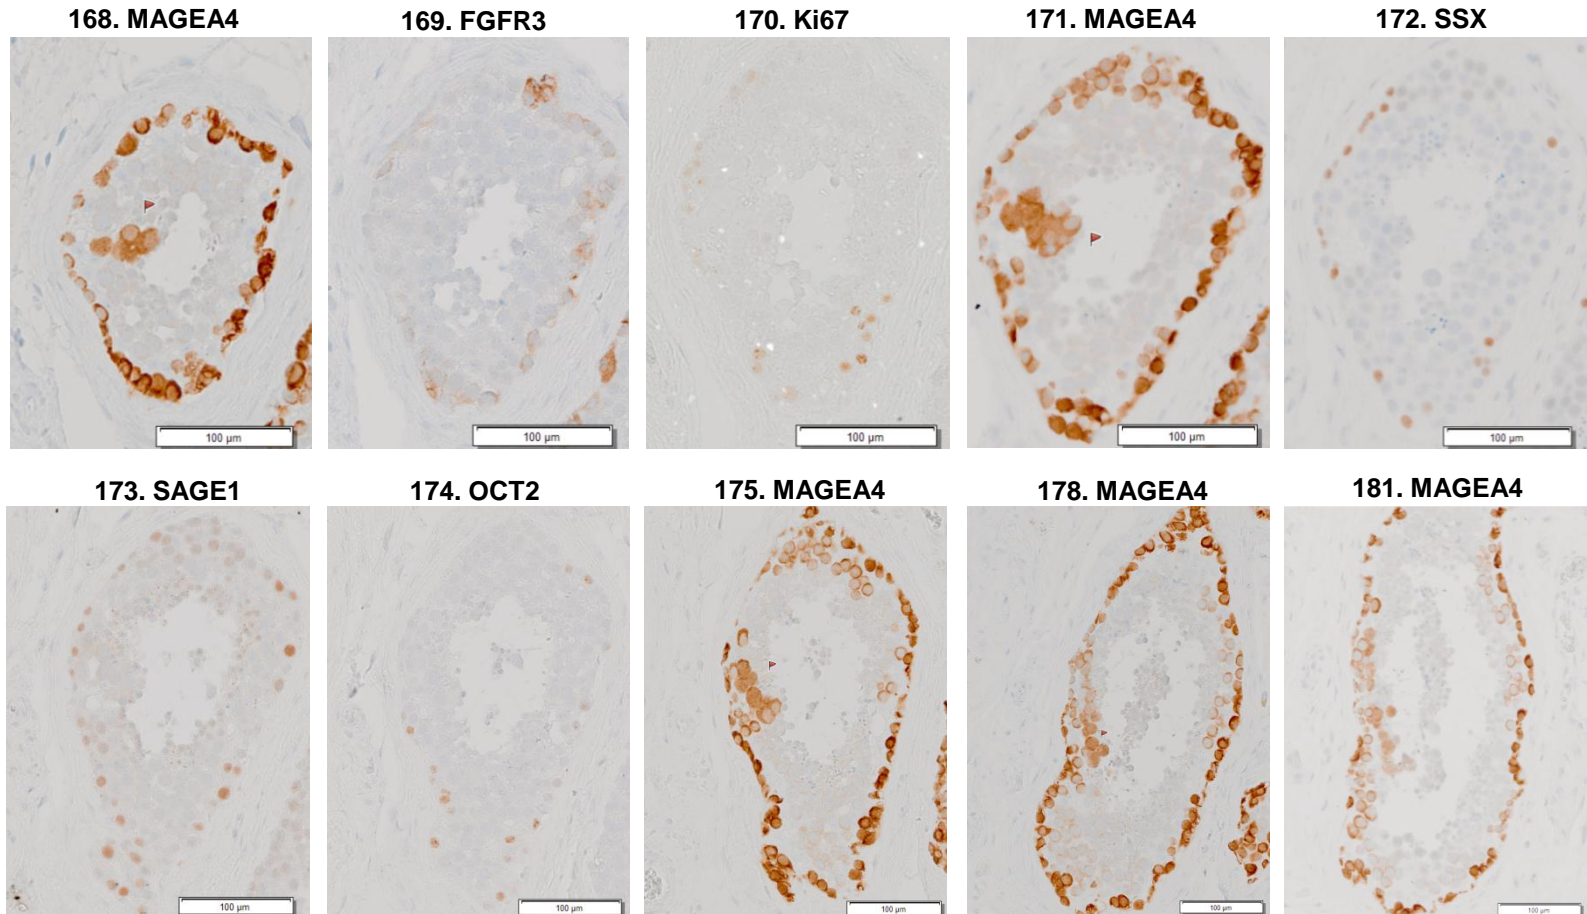

# Clone no. 1-2\_C4

**A**

| Clone no. | Location  | Slide 168 | Slide 169 | Slide 170 | Slide 171 | Slide 172 | Slide 173 | Slide 174 | Slide 175 | Slide 176 | Slide 177 | Slide 178 | Minimum number of cells |
|-----------|-----------|-----------|-----------|-----------|-----------|-----------|-----------|-----------|-----------|-----------|-----------|-----------|-------------------------|
|           |           | MAGEA4    | FGFR3     | Ki67      | MAGEA4    | SSX       | SAGE1     | OCT2      | MAGEA4    | n.s       | OCT2      | MAGEA4    |                         |
| 1-2_C4    | Periphery | 1         | 0         | 0         | 1         | 0         | 0         | 0         | 1         |           |           | 0         | 50                      |
|           |           | 5 cells   |           |           | 5 cells   |           |           |           | 9 cells   |           |           |           |                         |
| 40 μm     |           |           |           |           |           |           |           |           |           |           |           |           |                         |

**B**

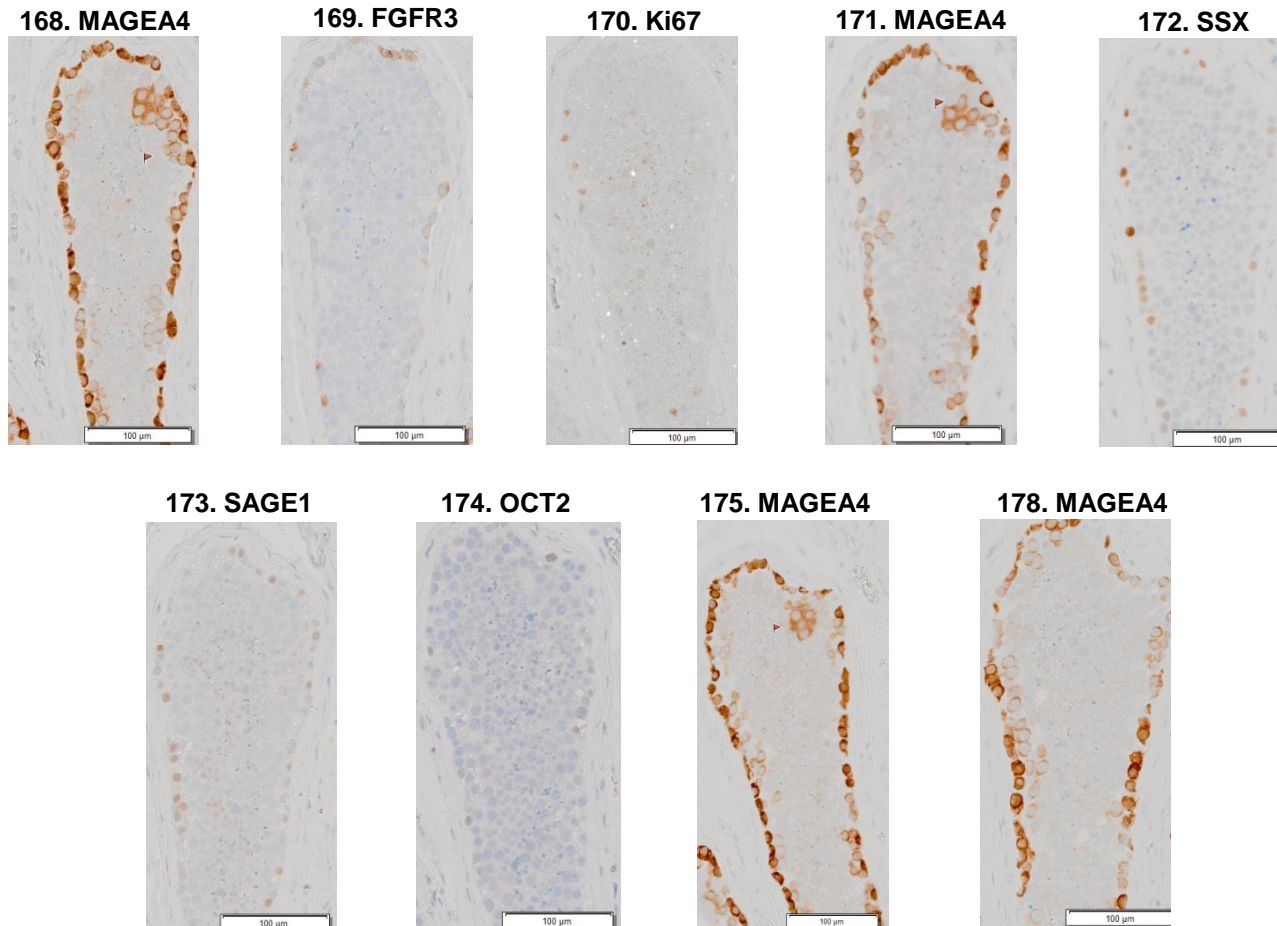

# Clone no. 1-2\_C5

**A**

| Clone no.  | Location       | Slide 168    | Slide 169 | Slide 170 | Slide 171    | Slide 172 | Slide 173 | Slide 174 | Slide 175    | Slide 176 | Slide 177 | Slide 178    | Slide 179 | Slide 180 | Slide 181 | Minimum number of cells |
|------------|----------------|--------------|-----------|-----------|--------------|-----------|-----------|-----------|--------------|-----------|-----------|--------------|-----------|-----------|-----------|-------------------------|
|            |                | MAGEA4       | FGFR3     | Ki67      | MAGEA4       | SSX       | SAGE1     | OCT2      | MAGEA4       | n.s       | OCT2      | MAGEA4       | FGFR3     | Ki67      | MAGEA4    |                         |
| 1-2_C5     | Near Periphery | 1<br>3 cells | 0         | 0         | 1<br>4 cells | 0         | 0         | 0         | 1<br>5 cells |           |           | 1<br>3 cells |           |           | 0         | 44                      |
| 55 $\mu$ m |                |              |           |           |              |           |           |           |              |           |           |              |           |           |           |                         |

**B**

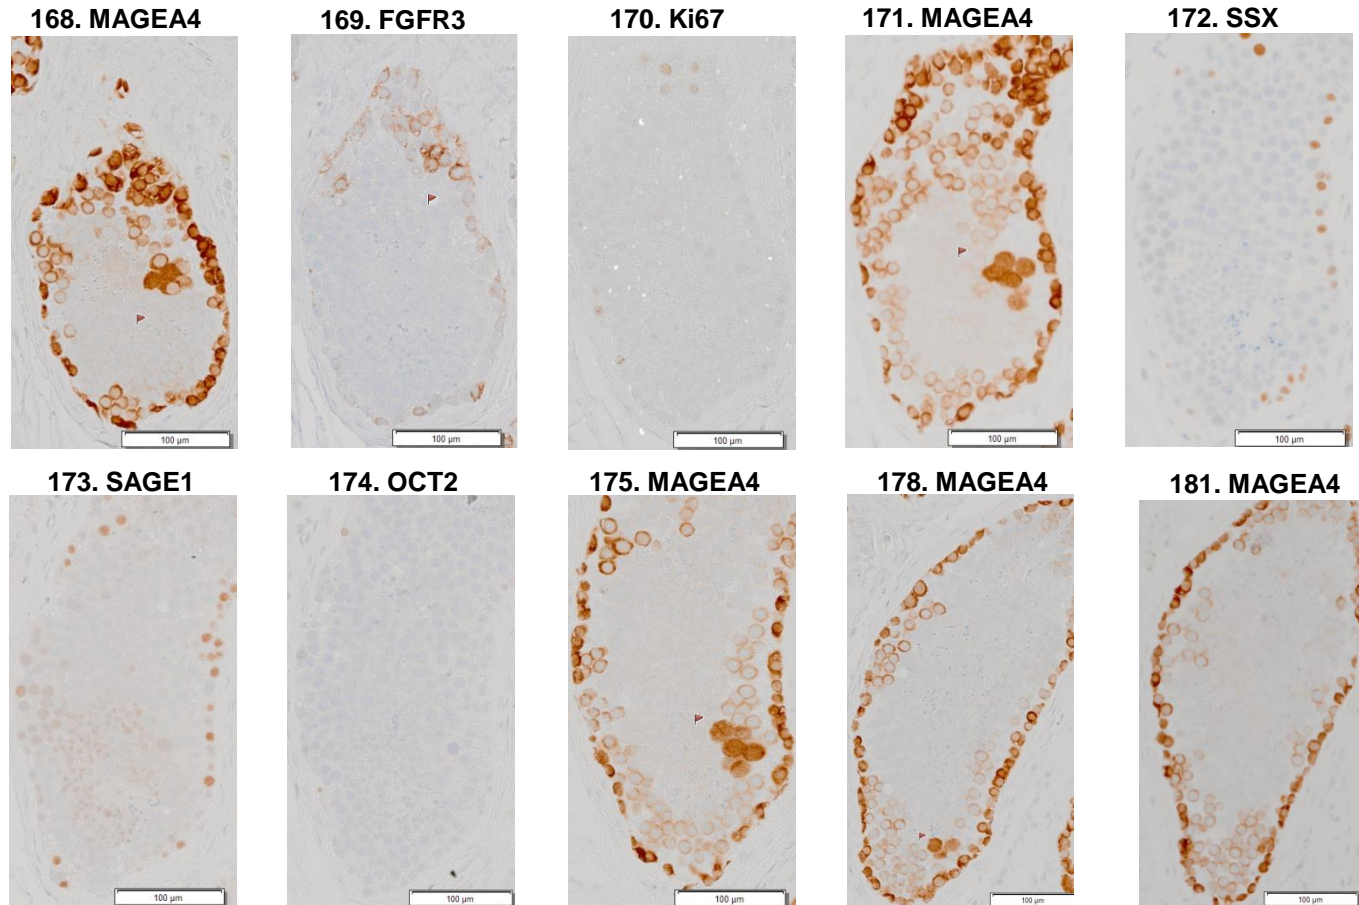

# Clone no. 1-2\_C6

**A**

| Clone no.  | Location       | Slide 168 | Slide 169 | Slide 170 | Slide 171 | Slide 172 | Slide 173 | Slide 174 | Slide 175 | Slide 176 | Slide 177 | Slide 178 | Slide 179 | Slide 180 | Slide 181 | Minimum number of cells |
|------------|----------------|-----------|-----------|-----------|-----------|-----------|-----------|-----------|-----------|-----------|-----------|-----------|-----------|-----------|-----------|-------------------------|
|            |                | MAGEA4    | FGFR3     | Ki67      | MAGEA4    | SSX       | SAGE1     | OCT2      | MAGEA4    | n.s       | OCT2      | MAGEA4    | FGFR3     | Ki67      | MAGEA4    |                         |
| 1-2_C6     | Near Periphery | 0*        | 0         | 0         | 1         | 0         | 0         | 0         | 1         |           |           | 1         |           |           | 0         | 65                      |
|            |                | 1 cell    |           |           | 8 cells   |           |           |           | 7 cells   |           |           | 5 cells   |           |           |           |                         |
| 55 $\mu$ m |                |           |           |           |           |           |           |           |           |           |           |           |           |           |           |                         |

**B**

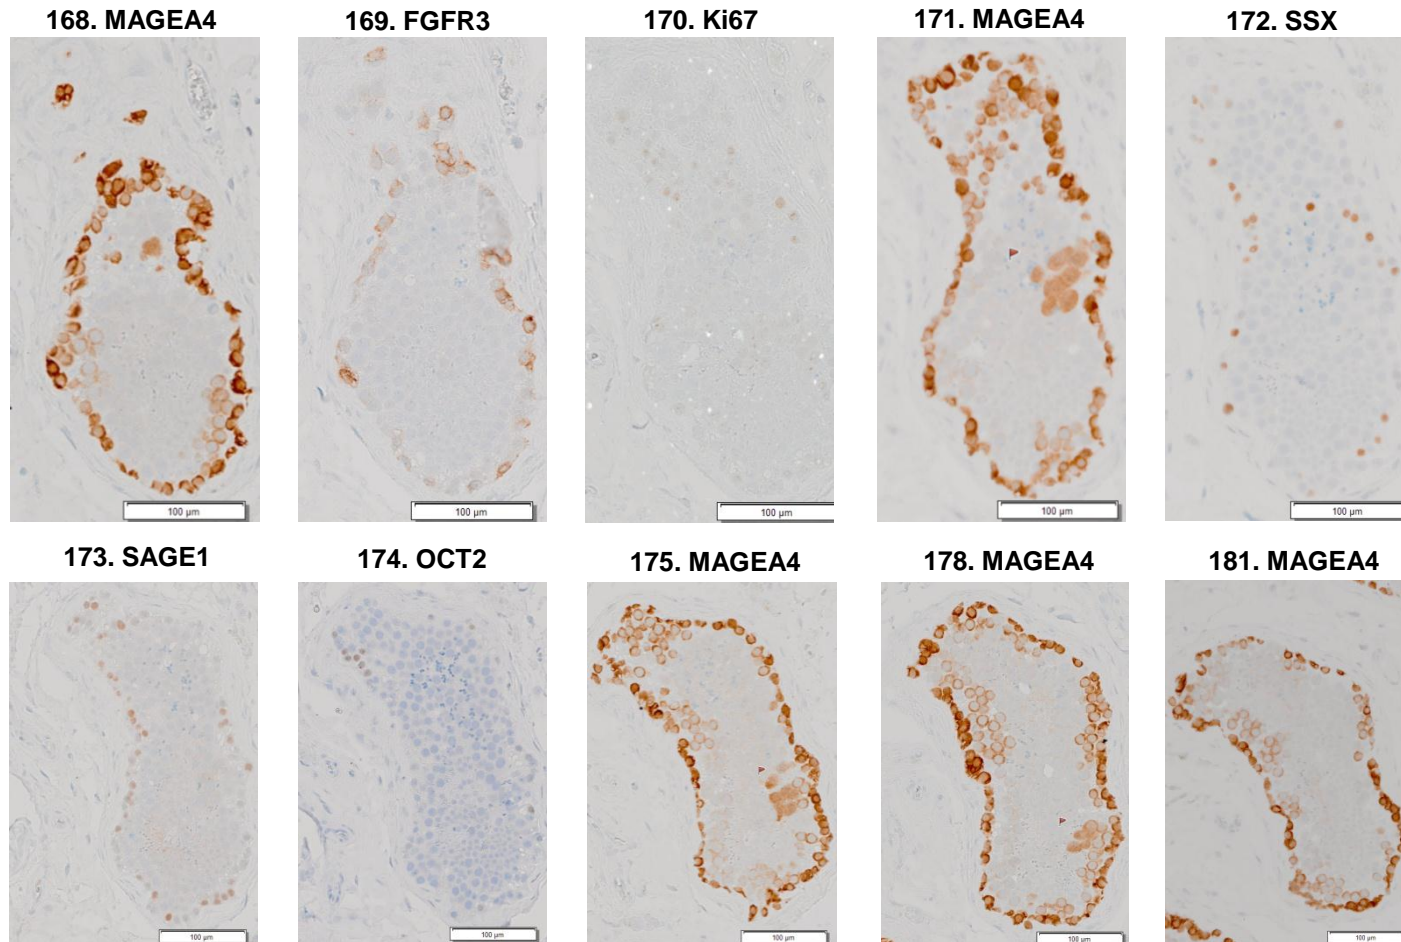

# Clone no. 1-2\_C7

**A**

| Clone no.  | Location       | Slide 168 | Slide 169 | Slide 170 | Slide 171 | Slide 172 | Slide 173 | Slide 174 | Slide 175 | Slide 176 | Slide 177 | Slide 178 | Slide 179 | Slide 180 | Slide 181 | Minimum number of cells |
|------------|----------------|-----------|-----------|-----------|-----------|-----------|-----------|-----------|-----------|-----------|-----------|-----------|-----------|-----------|-----------|-------------------------|
|            |                | MAGEA4    | FGFR3     | Ki67      | MAGEA4    | SSX       | SAGE1     | OCT2      | MAGEA4    | n.s       | OCT2      | MAGEA4    | FGFR3     | Ki67      | MAGEA4    |                         |
| 1-2_C7     | Near Periphery | 1         | 0         | 0         | 1         | 0         | 0         | 0         | 1         |           |           | 1         |           |           | 1         | 152                     |
|            |                | 13 cells  |           |           | 10 cells  |           |           |           | 19 cells  |           |           | 6 cells   |           | 3 cells   |           |                         |
| 70 $\mu$ m |                |           |           |           |           |           |           |           |           |           |           |           |           |           |           |                         |

**B**

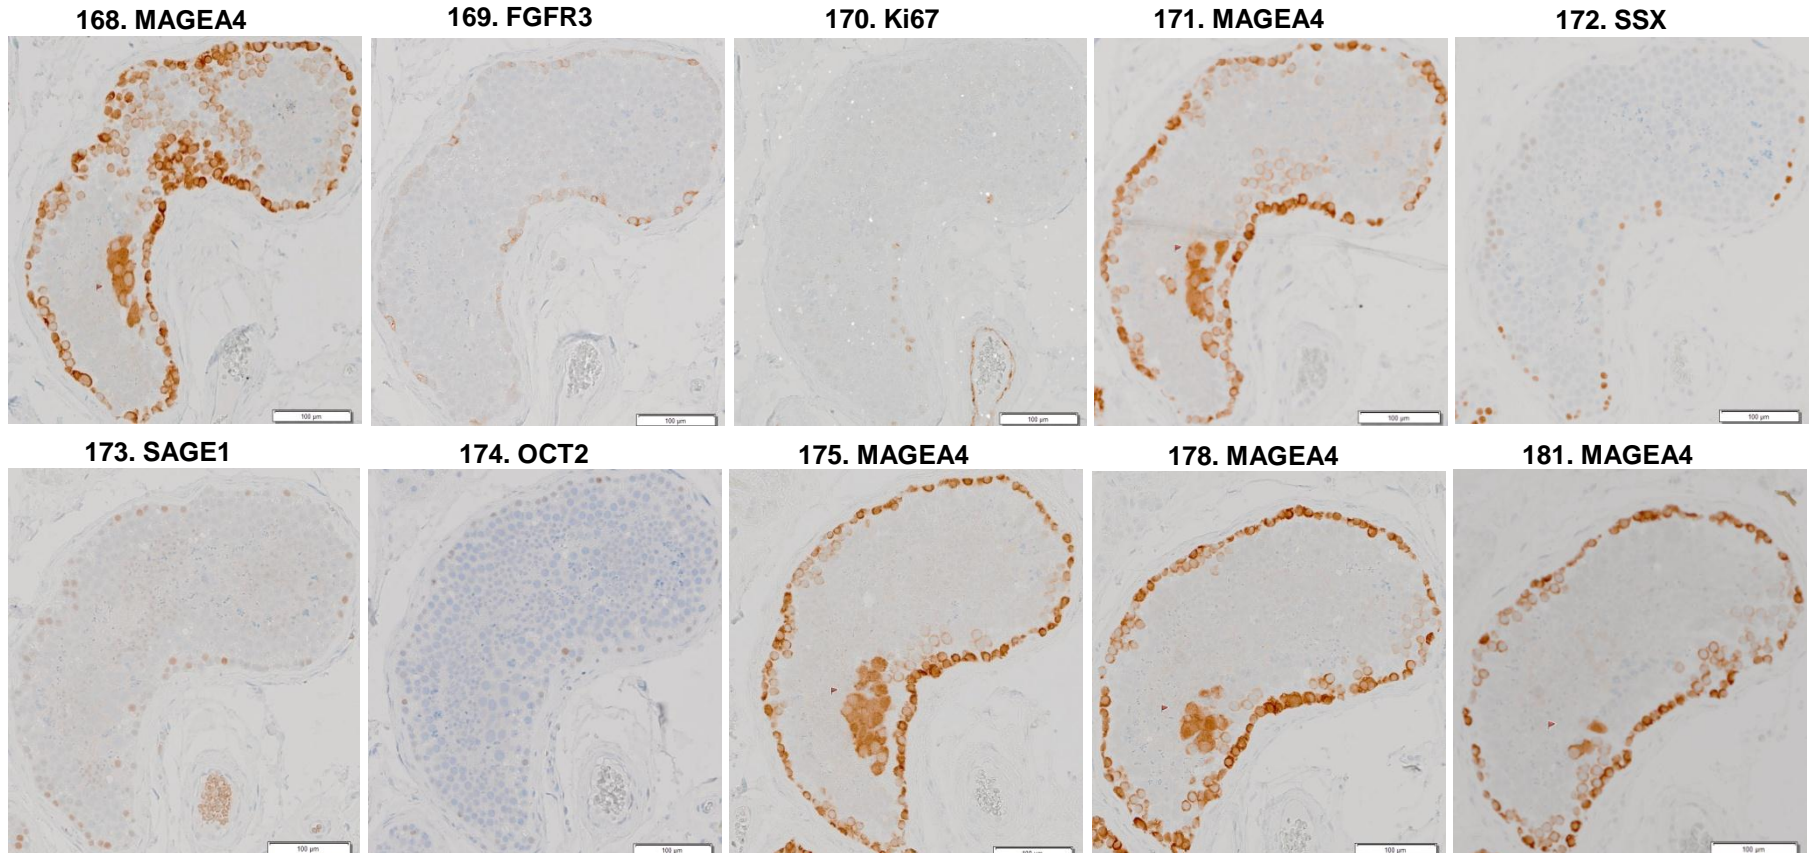

# Clone no. 1-2\_C8

**A**

| Clone no. | Location       | Slide 168 | Slide 169 | Slide 170 | Slide 171 | Slide 172 | Slide 173 | Slide 174 | Slide 175 | Slide 176 | Slide 177 | Slide 178 | Slide 179 | Slide 180 | Slide 181 | Minimum number of cells |
|-----------|----------------|-----------|-----------|-----------|-----------|-----------|-----------|-----------|-----------|-----------|-----------|-----------|-----------|-----------|-----------|-------------------------|
|           |                | MAGEA4    | FGFR3     | Ki67      | MAGEA4    | SSX       | SAGE1     | OCT2      | MAGEA4    | n.s       | OCT2      | MAGEA4    | FGFR3     | Ki67      | MAGEA4    |                         |
| 1-2_C8    | Near Periphery | 0*        | 0         | 0         | 1         | 0         | 0         | 0         | 1         |           |           | 0*        |           |           | 0         | 40                      |
|           |                | 2 cells   |           |           | 6 cells   |           |           |           | 3 cells   |           |           | 2 cells   |           |           |           |                         |
| 55 µm     |                |           |           |           |           |           |           |           |           |           |           |           |           |           |           |                         |

**B**

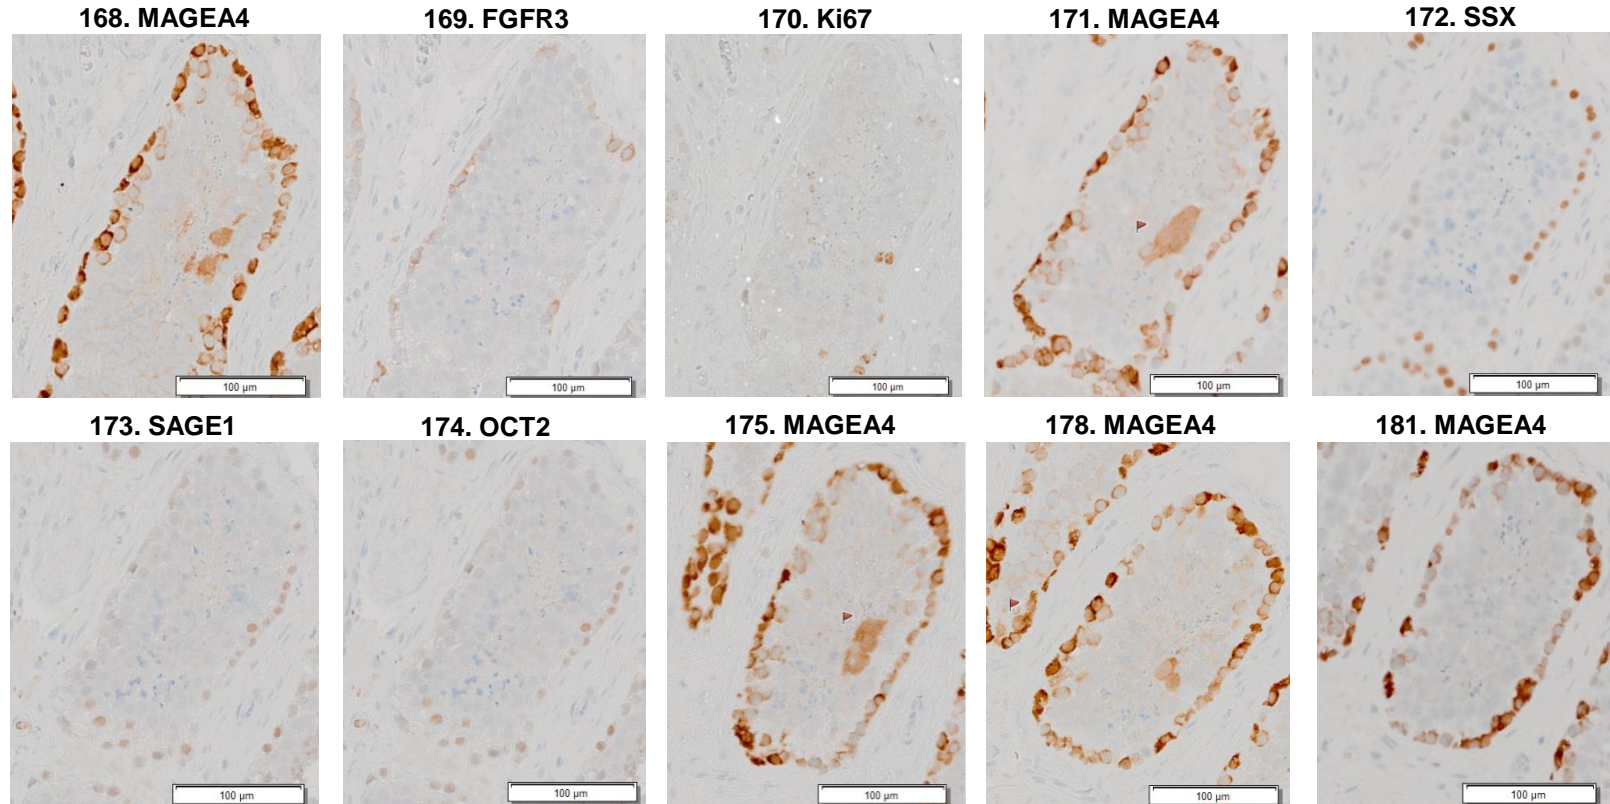



# Clone no. 1-2\_C10

**A**

| Clone no. | Location | Slide 168 | Slide 169 | Slide 170 | Slide 171 | Slide 172 | Slide 173 | Slide 174 | Slide 175 | Slide 176 | Slide 177 | Slide 178 | Slide 179 | Slide 180 | Slide 181 | Slide 182 | Slide 183 | Slide 184 | Slide 185 | Minimum number of cells |
|-----------|----------|-----------|-----------|-----------|-----------|-----------|-----------|-----------|-----------|-----------|-----------|-----------|-----------|-----------|-----------|-----------|-----------|-----------|-----------|-------------------------|
|           |          | MAGEA4    | FGFR3     | Ki67      | MAGEA4    | SSX       | SAGE1     | OCT2      | MAGEA4    | n.s       | OCT2      | MAGEA4    | FGFR3     | Ki67      | MAGEA4    | SSX       | FGFR3     | n.s       | MAGEA4    |                         |
| 1-2_C10   | Centre   | 1         | 0         | 0         | 1         | 0         | 0         | 0         | 1         |           |           | 1         |           |           | 1         |           |           |           | 0         | 131                     |
|           |          | 5 cells   |           |           | 9 cells   |           |           |           | 9 cells   |           |           | 14 cells  |           |           | 8 cells   |           |           |           |           |                         |
|           |          | 70 µm     |           |           |           |           |           |           |           |           |           |           |           |           |           |           |           |           |           |                         |

**B**

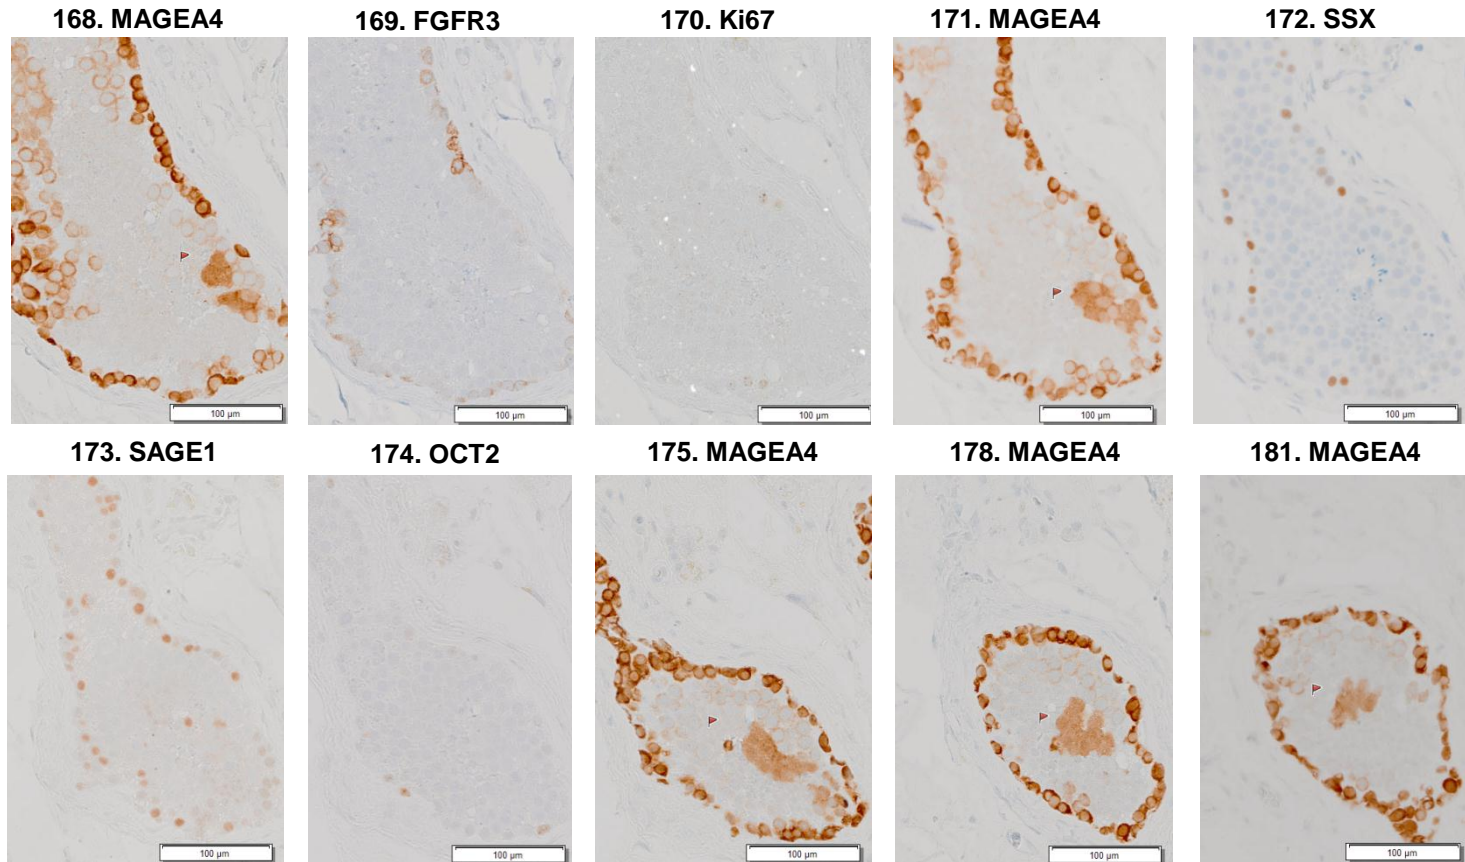



# Clone no. 1-2\_C11

**A**

| Clone no. | Location           | Slide 168 | Slide 169 | Slide 170 | Slide 171 | Slide 172 | Slide 173 | Slide 174 | Slide 175 | Slide 176 | Slide 177 | Slide 178 | Minimum number of cells |
|-----------|--------------------|-----------|-----------|-----------|-----------|-----------|-----------|-----------|-----------|-----------|-----------|-----------|-------------------------|
|           |                    | MAGEA4    | FGFR3     | Ki67      | MAGEA4    | SSX       | SAGE1     | OCT2      | MAGEA4    | n.s       | OCT2      | MAGEA4    |                         |
| 1-2_C11   | Centre & periphery | 0*        | 0         | 0         | 1         | 0         | 0         | 0         | 1         |           |           | NA        | 58                      |
|           |                    | 2 cells   |           |           | 11 cells  |           |           |           | 6 cells   |           |           |           |                         |
| 40 µm     |                    |           |           |           |           |           |           |           |           |           |           |           |                         |

**B**

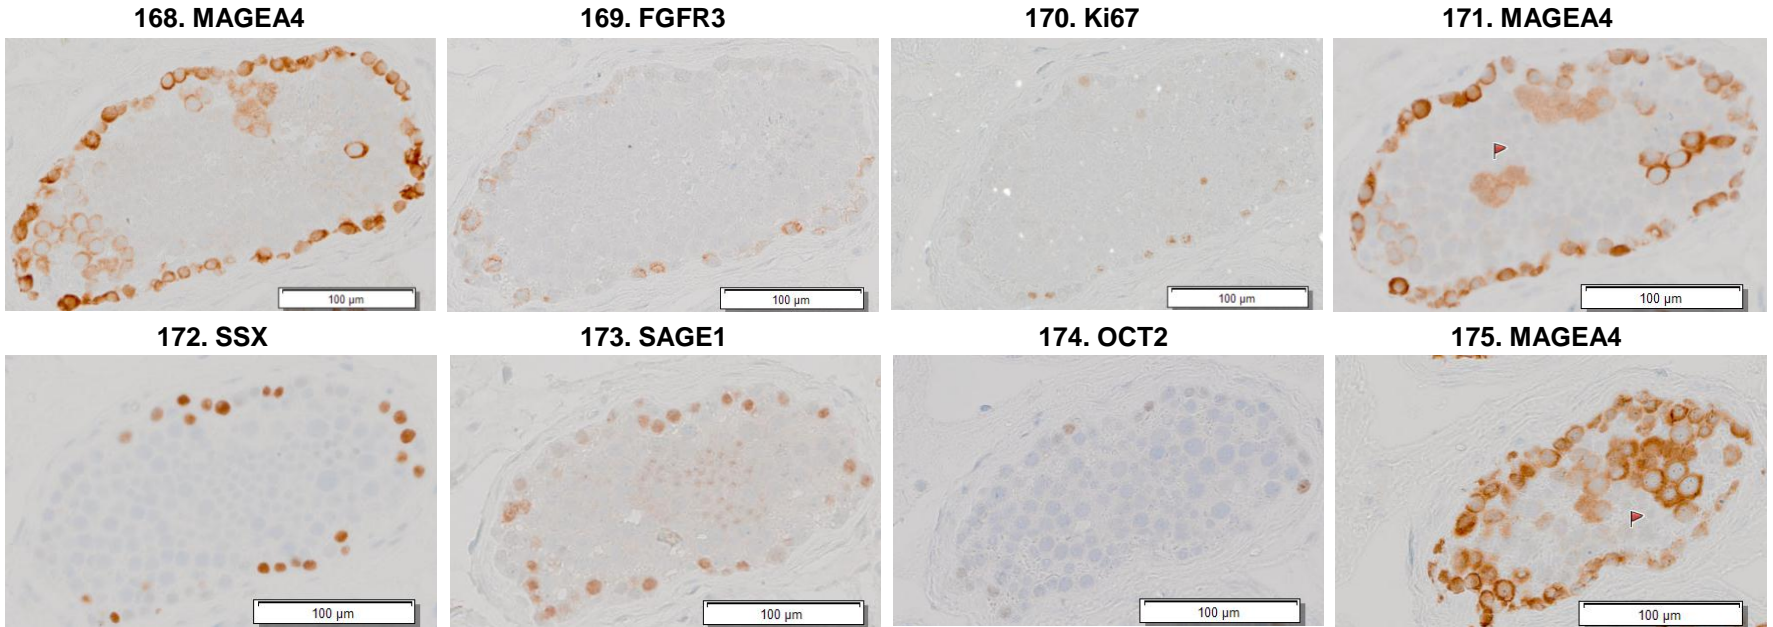

# Clone no. 1-2\_C12

**A**

| Clone no. | Location       | Slide 168 | Slide 169 | Slide 170 | Slide 171 | Slide 172 | Slide 173 | Slide 174 | Slide 175 | Slide 176 | Slide 177 | Slide 178 | Minimum number of cells |
|-----------|----------------|-----------|-----------|-----------|-----------|-----------|-----------|-----------|-----------|-----------|-----------|-----------|-------------------------|
|           |                | MAGEA4    | FGFR3     | Ki67      | MAGEA4    | SSX       | SAGE1     | OCT2      | MAGEA4    | n.s       | OCT2      | MAGEA4    |                         |
| 1-2_C12   | Near Periphery | 0*        | 0         | 0         | 1         | 0         | 0         | 0         | 1         |           |           | NA        | 41                      |
|           |                | 1 cell    |           |           | 6 cells   |           |           |           | 7 cells   |           |           |           |                         |
| 40 μm     |                |           |           |           |           |           |           |           |           |           |           |           |                         |

**B**

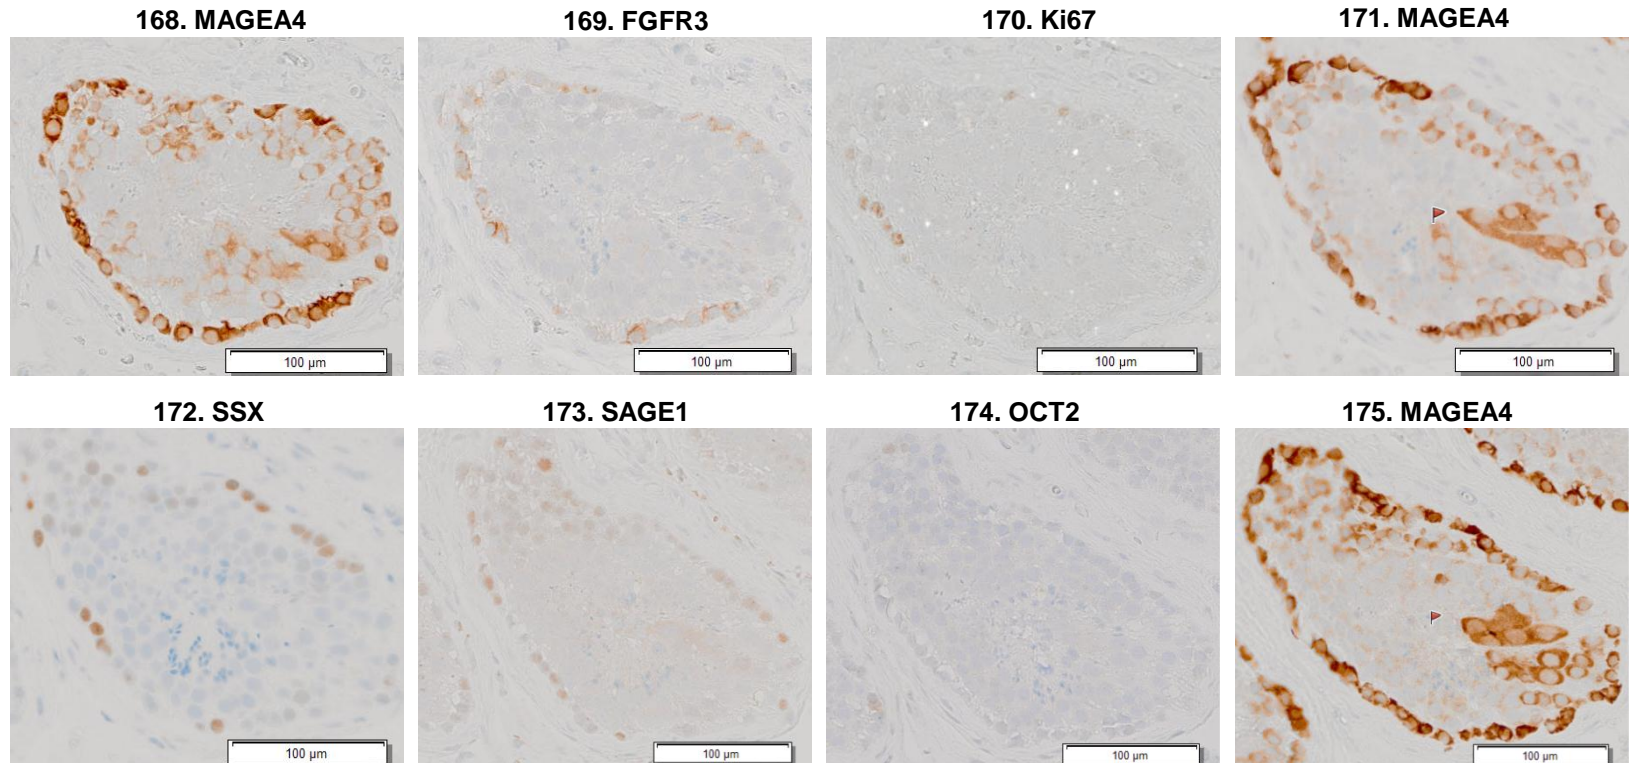

# Clone no. 1-2\_C13

**A**

| Clone no. | Location | Slide 168 | Slide 169 | Slide 170 | Slide 171 | Slide 172 | Slide 173 | Slide 174 | Slide 175 | Slide 176 | Slide 177 | Slide 178 | Slide 179 | Slide 180 | Slide 181 | Minimum number of cells |
|-----------|----------|-----------|-----------|-----------|-----------|-----------|-----------|-----------|-----------|-----------|-----------|-----------|-----------|-----------|-----------|-------------------------|
|           |          | MAGEA4    | FGFR3     | Ki67      | MAGEA4    | SSX       | SAGE1     | OCT2      | MAGEA4    | n.s       | OCT2      | MAGEA4    | FGFR3     | Ki67      | MAGEA4    |                         |
| 1-2_C13   | Centre   | 1         | 0         | 0         | 1         | 0         | 0         | 0         | 1         |           |           | 1         |           |           | 0         | 63                      |
|           |          | 8 cells   |           |           | 4 cells   |           |           |           | 7 cells   |           |           | 4 cells   |           |           |           |                         |
|           |          | 55 µm     |           |           |           |           |           |           |           |           |           |           |           |           |           |                         |

**B**

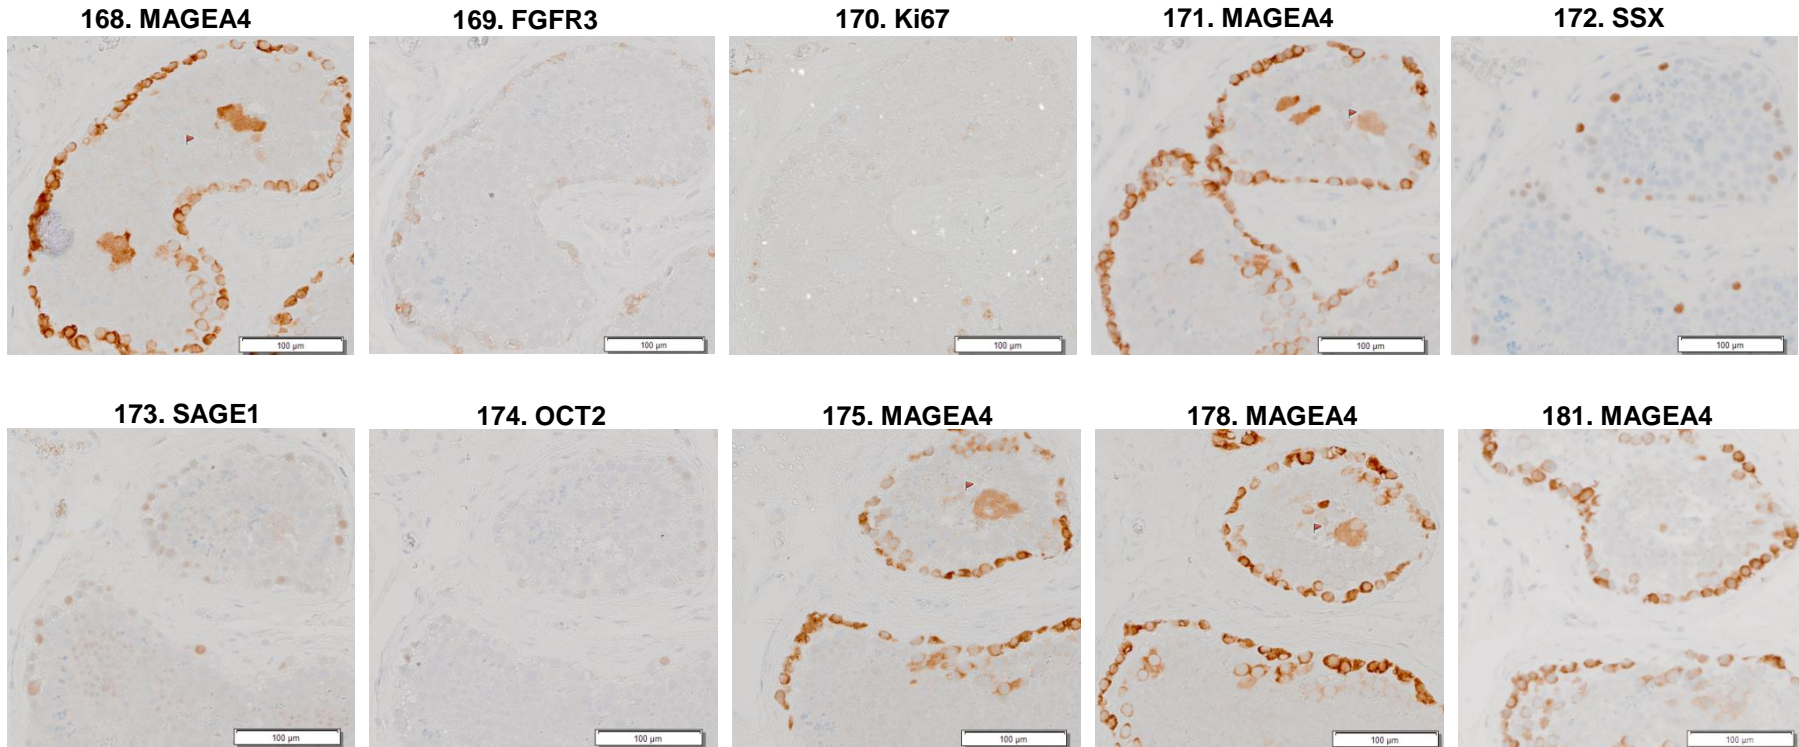

# Clone no. 1-2\_C14

**A**

| Clone no.  | Location | Slide 168 | Slide 169 | Slide 170 | Slide 171 | Slide 172 | Slide 173 | Slide 174 | Slide 175 | Minimum number of cells |
|------------|----------|-----------|-----------|-----------|-----------|-----------|-----------|-----------|-----------|-------------------------|
|            |          | MAGEA4    | FGFR3     | Ki67      | MAGEA4    | SSX       | SAGE1     | OCT2      | MAGEA4    |                         |
| 1-2_C14    | Centre   | 0*        | 0         | 0         | 1         | 1         | 0*        | 0         | NA        | 58                      |
|            |          | 7 cells   |           |           | 12 cells  | 13 cells  | 7 cells   |           |           |                         |
| 30 $\mu$ m |          |           |           |           |           |           |           |           |           |                         |

**B**

**168. MAGEA4**

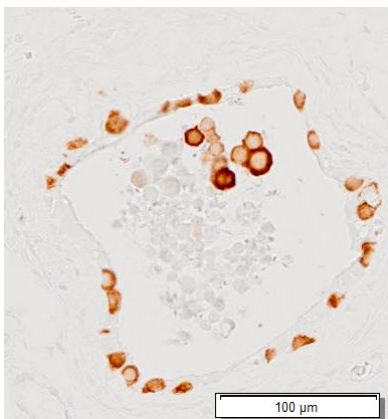

**169. FGFR3**

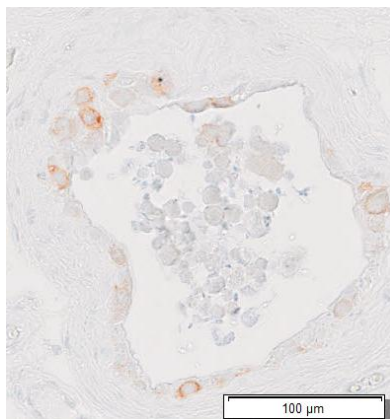

**170. Ki67**

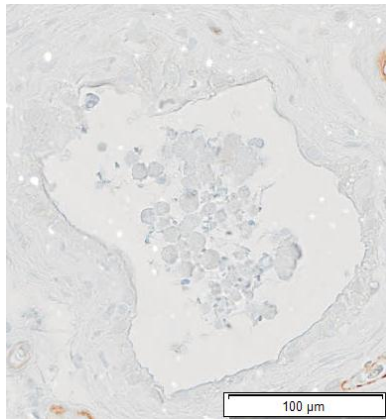

**171. MAGEA4**

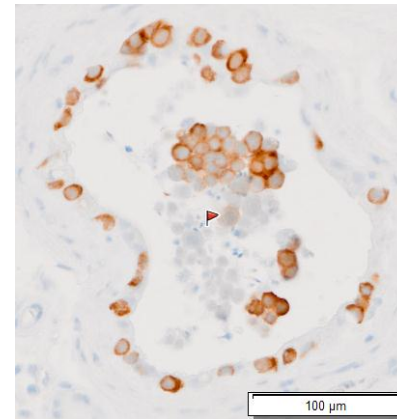

**172. SSX**

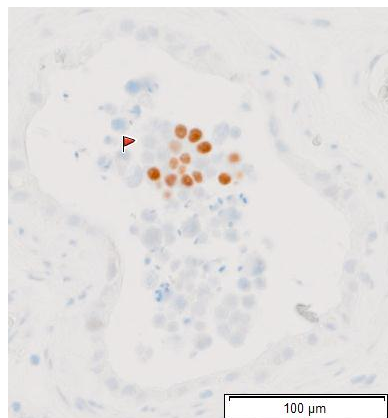

**173. SAGE1**

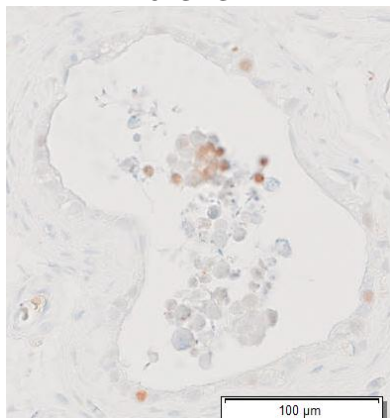

**174. OCT2**

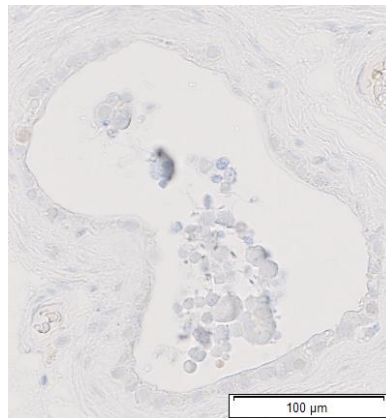

**175. MAGEA4**

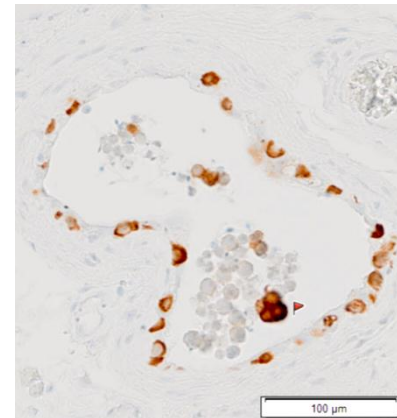

# Clone no. 1-2\_C15

**A**

| Clone no.  | Location | Slide 168 | Slide 169 | Slide 170 | Slide 171 | Slide 172 | Slide 173 | Slide 174 | Slide 175 | Slide 176 | Slide 177 | Slide 178 | Minimum number of cells |
|------------|----------|-----------|-----------|-----------|-----------|-----------|-----------|-----------|-----------|-----------|-----------|-----------|-------------------------|
|            |          | MAGEA4    | FGFR3     | Ki67      | MAGEA4    | SSX       | SAGE1     | OCT2      | MAGEA4    | n.s       | OCT2      | MAGEA4    |                         |
| 1-2_C15    | Centre   | 0*        | 0         | 0         | 1         | 0         | 0         | 0         | 1         |           |           | 0*        | 34                      |
|            |          | 2 cells   |           |           | 4 cells   |           |           |           | 4 cells   |           |           | 1 cell    |                         |
| 55 $\mu$ m |          |           |           |           |           |           |           |           |           |           |           |           |                         |

**B**

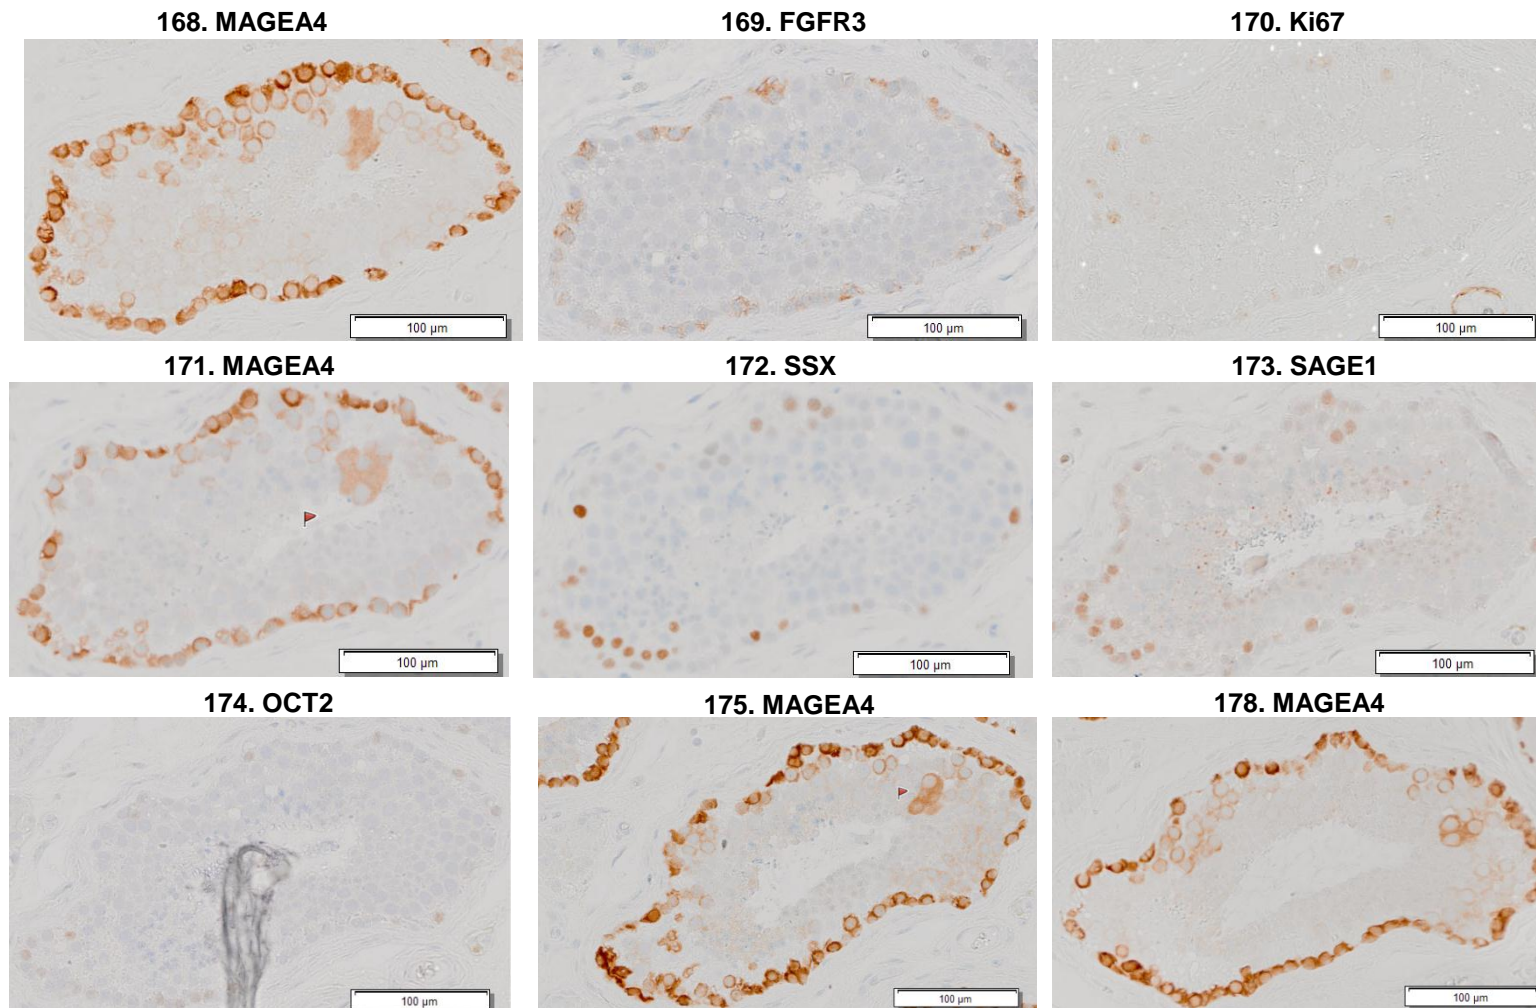

# Clone no. 1-2\_C16

**A**

| Clone no. | Location | Slide 168 | Slide 169 | Slide 170 | Slide 171 | Slide 172 | Slide 173 | Slide 174 | Slide 175 | Slide 176 | Slide 177 | Slide 178 | Slide 179 | Slide 180 | Slide 181 | Minimum number of cells |
|-----------|----------|-----------|-----------|-----------|-----------|-----------|-----------|-----------|-----------|-----------|-----------|-----------|-----------|-----------|-----------|-------------------------|
|           |          | MAGEA4    | FGFR3     | Ki67      | MAGEA4    | SSX       | SAGE1     | OCT2      | MAGEA4    | n.s.      | OCT2      | MAGEA4    | FGFR3     | Ki67      | MAGEA4    |                         |
| 1-2_C16   | Centre   | 0         | 0         | 0         | 1         | 0         | 0         | 0         | 1         |           |           | 0*        |           |           | 0         | 33                      |
|           |          |           |           |           | 3 cells   |           |           |           |           | 6 cells   |           |           | 2 cells   |           |           |                         |
| 40 µm     |          |           |           |           |           |           |           |           |           |           |           |           |           |           |           |                         |

**B**

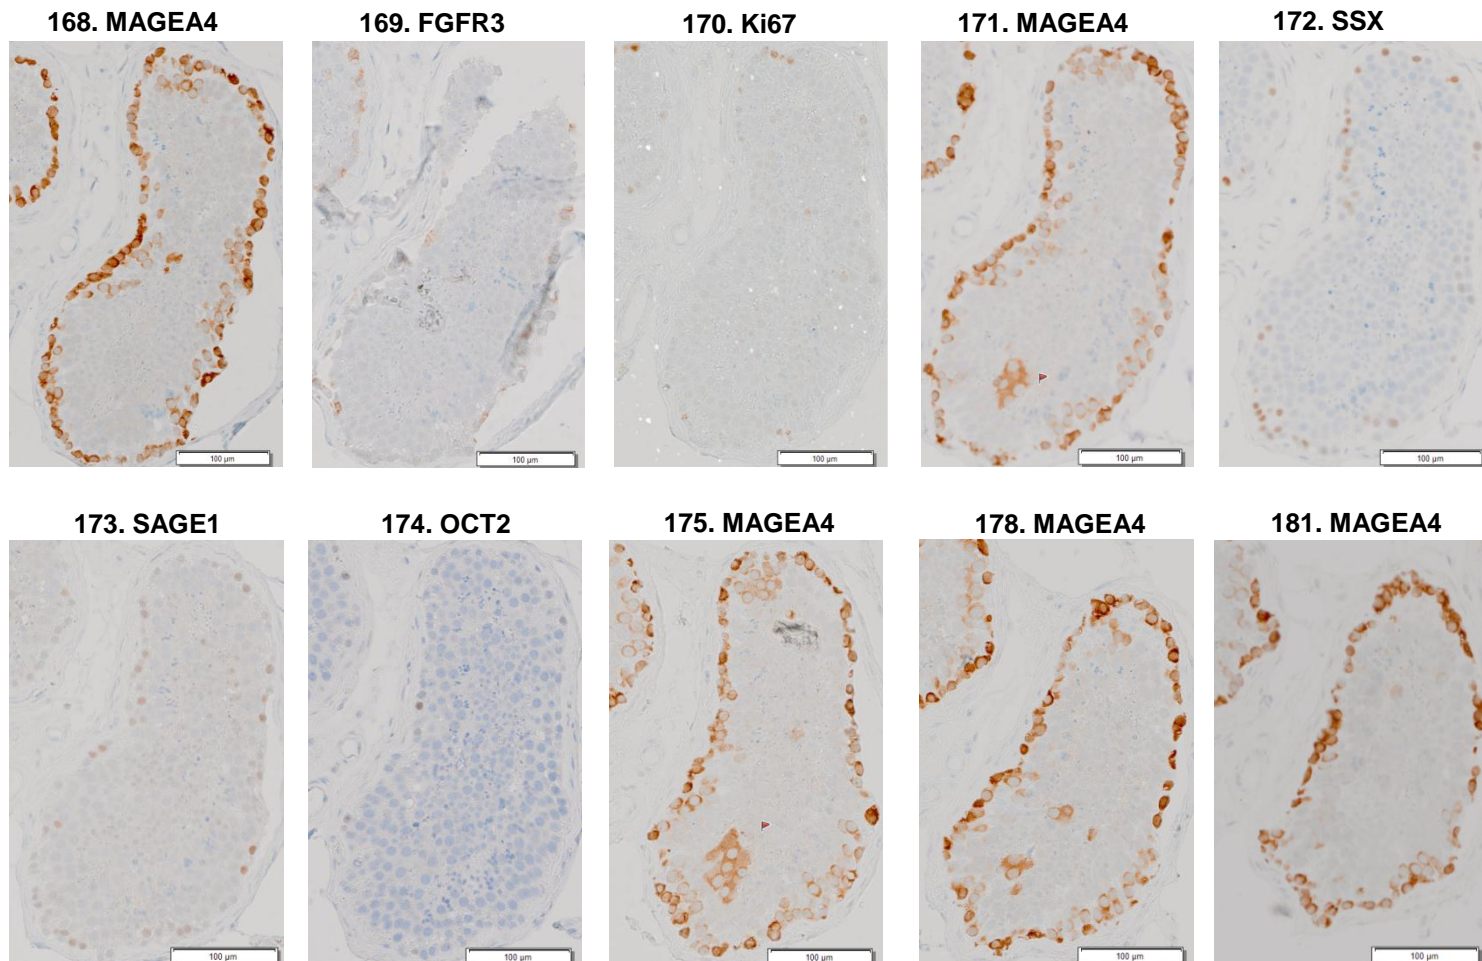

# Clone no. 1-2\_C17

**A**

| Clone no. | Location | Slide 171 | Slide 172 | Slide 173 | Slide 174 | Slide 175 | Slide 176 | Slide 177 | Slide 178 | Slide 179 | Slide 180 | Slide 181 | Slide 182 | Slide 183 | Slide 184 | Slide 185 | Minimum number of cells |
|-----------|----------|-----------|-----------|-----------|-----------|-----------|-----------|-----------|-----------|-----------|-----------|-----------|-----------|-----------|-----------|-----------|-------------------------|
|           |          | MAGEA4    | SSX       | SAGE1     | OCT2      | MAGEA4    | n.s.      | OCT2      | MAGEA4    | FGFR3     | Ki67      | MAGEA4    | SSX       | FGFR3     | n.s.      | MAGEA4    |                         |
| 1-2_C17   | Centre   | 0         | 0         | 0         | 0         | 1         |           | 0         | 1         | 0         | 0         | 1         | 0         |           |           | 0         | 40                      |
|           |          |           |           |           |           | 8 cells   |           |           | 4 cells   |           |           | 6 cells   |           |           |           |           |                         |
|           |          | 35 µm     |           |           |           |           |           |           |           |           |           |           |           |           |           |           |                         |

**B**

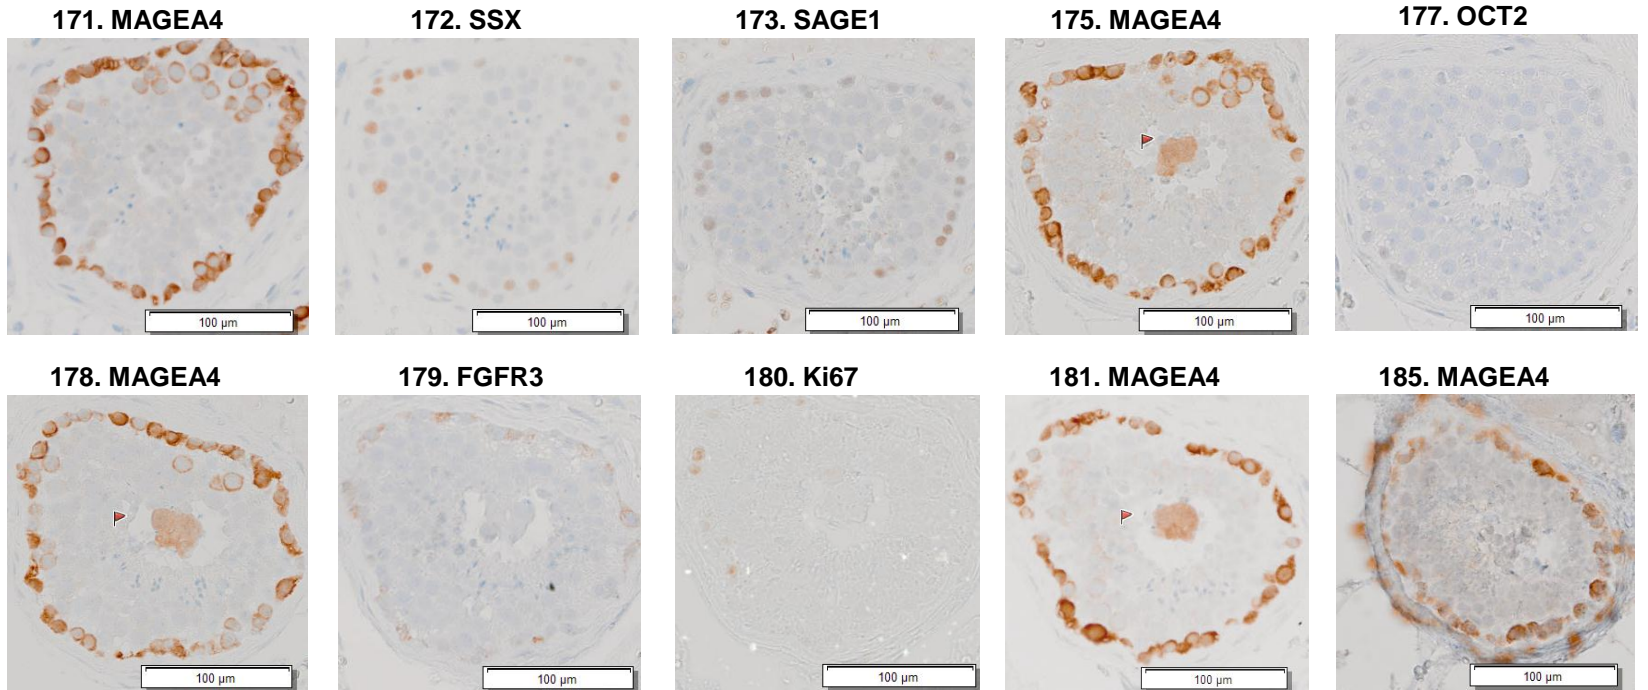

# Clone no. 1-2\_C18

**A**

| Clone no. | Location  | Slide 168 | Slide 169 | Slide 170 | Slide 171 | Slide 172 | Slide 173 | Slide 174 | Slide 175 | Slide 176 | Slide 177 | Slide 178 | Slide 179 | Slide 180 | Slide 181 | Minimum number of cells |
|-----------|-----------|-----------|-----------|-----------|-----------|-----------|-----------|-----------|-----------|-----------|-----------|-----------|-----------|-----------|-----------|-------------------------|
|           |           | MAGEA4    | FGFR3     | Ki67      | MAGEA4    | SSX       | SAGE1     | OCT2      | MAGEA4    | n.s       | OCT2      | MAGEA4    | FGFR3     | Ki67      | MAGEA4    |                         |
| 1-2_C18   | Periphery | 0*        | NA        | 0         | 0*        | 1         | 1         | 0         | 1         |           | 0         | 1         | 0         |           | 0         | 112                     |
|           |           | 1 cell    |           |           | 7 cells   | 11 cells  | 11 cells  |           | 18 cells  |           |           | 11 cells  |           |           |           |                         |
| 55 µm     |           |           |           |           |           |           |           |           |           |           |           |           |           |           |           |                         |

**B**

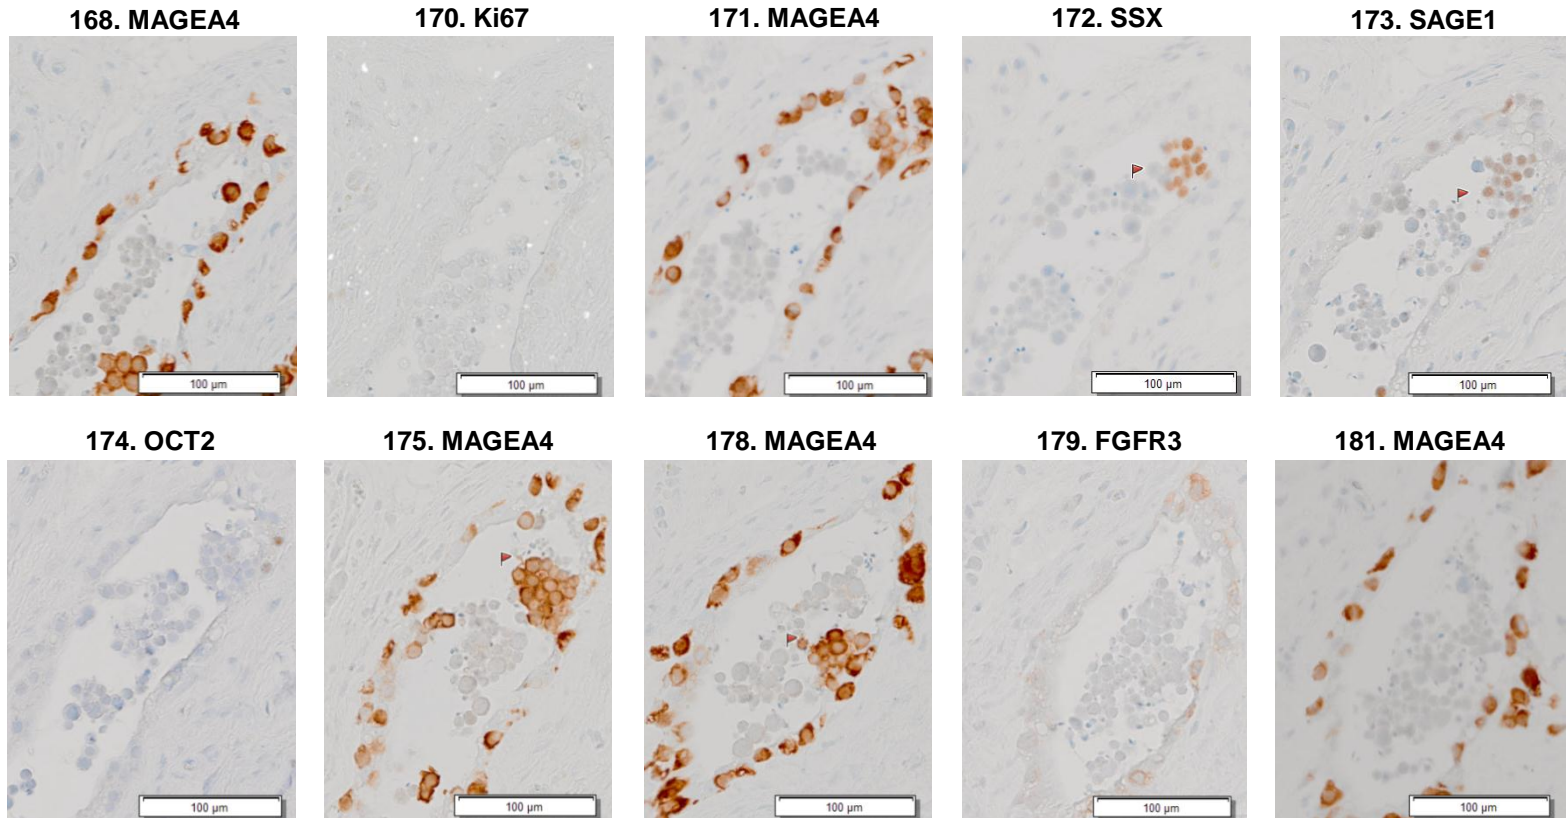



# Clone no. 1-2\_C19

**A**

| Clone no. | Location       | Slide 171 | Slide 172 | Slide 173 | Slide 174 | Slide 175 | Slide 176 | Slide 177 | Slide 178 | Slide 179 | Slide 180 | Slide 181 | Minimum number of cells |
|-----------|----------------|-----------|-----------|-----------|-----------|-----------|-----------|-----------|-----------|-----------|-----------|-----------|-------------------------|
|           |                | MAGEA4    | SSX       | SAGE1     | OCT2      | MAGEA4    | n.s       | OCT2      | MAGEA4    | FGFR3     | Ki67      | MAGEA4    |                         |
| 1-2_C19   | Near Periphery | 0         | 0         | 0         | 0         | 1         |           | 0         | 1         | 0         | 0         | 0*        | 53                      |
|           |                |           |           |           |           | 5 cells   |           |           | 13 cells  |           |           | 2 cells   |                         |
| 35 µm     |                |           |           |           |           |           |           |           |           |           |           |           |                         |

**B**

171. MAGEA4

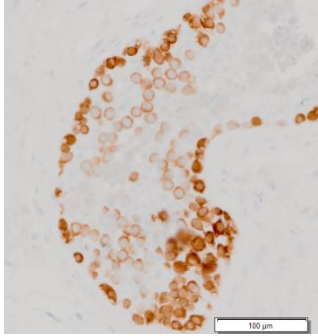

172. SSX

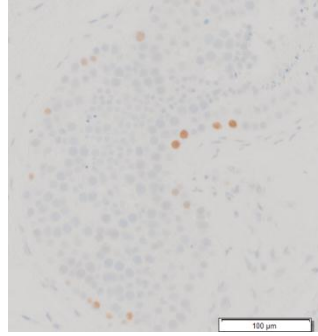

173. SAGE1

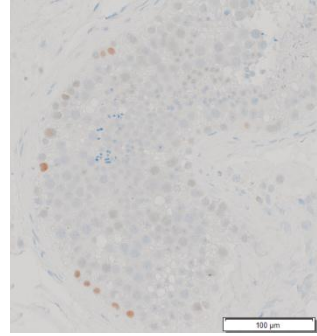

175. MAGEA4

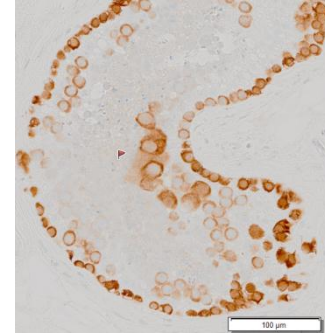

177. OCT2

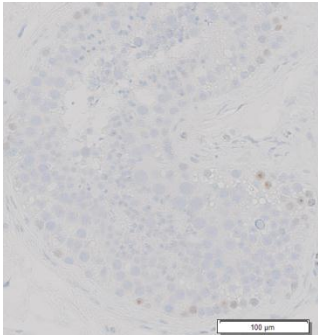

178. MAGEA4

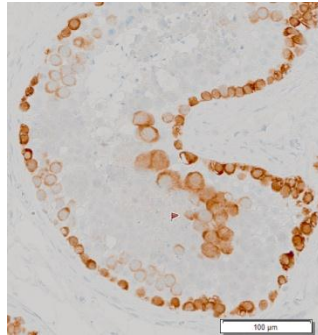

179. FGFR3

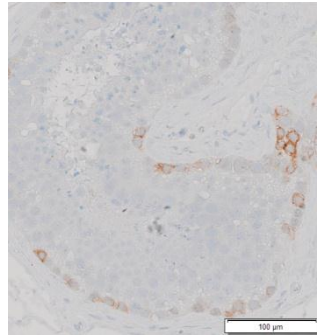

180. Ki67

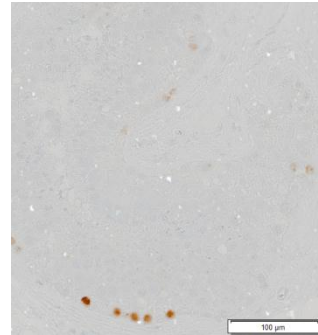

181. MAGEA4

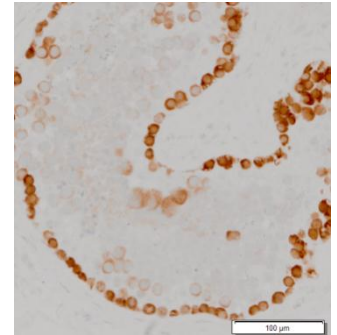

# Clone no. 1-2\_C20

**A**

| Clone no. | Location  | Slide 171 | Slide 172 | Slide 173 | Slide 174 | Slide 175 | Slide 176 | Slide 177 | Slide 178 | Slide 179 | Slide 180 | Slide 181 | Slide 182 | Slide 183 | Slide 184 | Slide 185 | Slide 186 | Slide 187 | Slide 188 | Slide 189 | Slide 190 | Slide 191 | Minimum number of cells |    |
|-----------|-----------|-----------|-----------|-----------|-----------|-----------|-----------|-----------|-----------|-----------|-----------|-----------|-----------|-----------|-----------|-----------|-----------|-----------|-----------|-----------|-----------|-----------|-------------------------|----|
|           |           | MAGEA4    | SSX       | SAGE1     | OCT2      | MAGEA4    | n.s.      | OCT2      | MAGEA4    | FGFR3     | Ki67      | MAGEA4    | SSX       | FGFR3     | n.s.      | MAGEA4    | n.s.      | n.s.      | n.s.      | n.s.      | n.s.      | MAGEA4    |                         |    |
| 1-2_C20   | Periphery | 0*        | 0         | 0         | 0         | 1         |           | 0         | 1         | 0         | 0         | 0*        |           |           |           | 0*        |           |           |           |           |           |           | NA                      | 87 |
|           |           | 3 cells   |           |           |           | 9 cells   |           |           | 5 cells   |           |           | 5 cells   |           |           |           | 6cells    |           |           |           |           |           |           |                         |    |
|           |           | 75 µm     |           |           |           |           |           |           |           |           |           |           |           |           |           |           |           |           |           |           |           |           |                         |    |

**B**

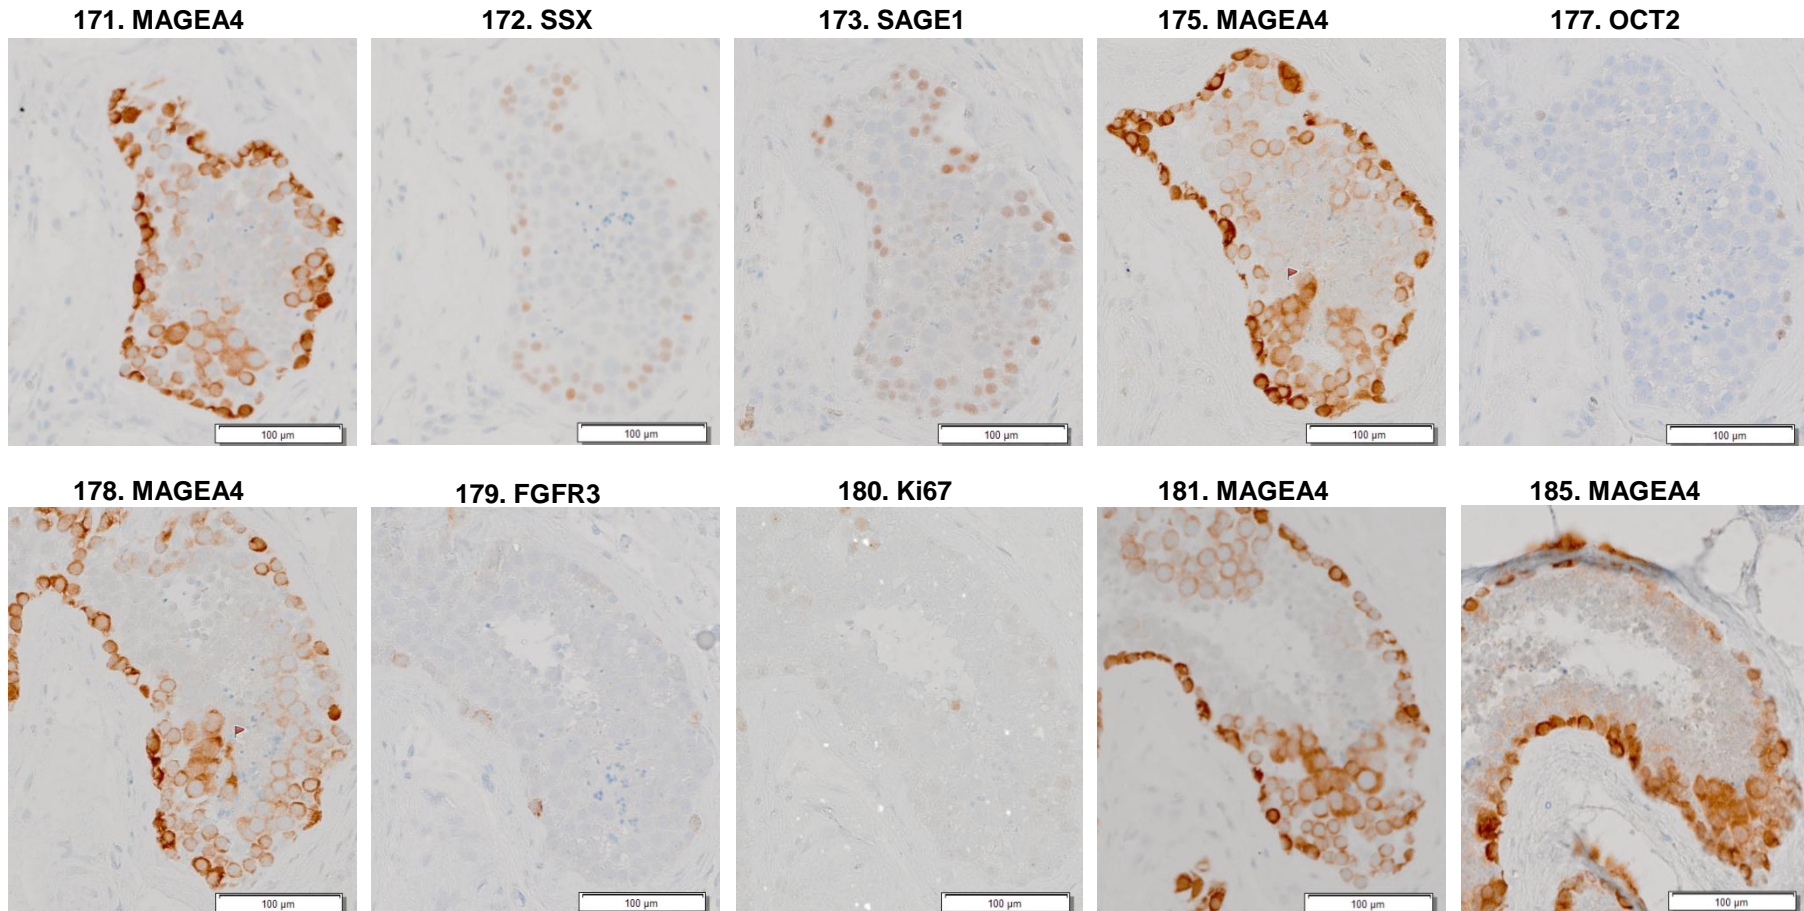

# Clone no. 1-2\_C21

**A**

| Clone no. | Location | Slide 171 | Slide 172 | Slide 173 | Slide 174 | Slide 175 | Slide 176 | Slide 177 | Slide 178 | Slide 179 | Slide 180 | Slide 181 | Slide 182 | Slide 183 | Slide 184 | Slide 185 | Slide 186 | Slide 187 | Slide 188 | Slide 189 | Slide 190 | Slide 191 | Minimum number of cells |
|-----------|----------|-----------|-----------|-----------|-----------|-----------|-----------|-----------|-----------|-----------|-----------|-----------|-----------|-----------|-----------|-----------|-----------|-----------|-----------|-----------|-----------|-----------|-------------------------|
|           |          | MAGEA4    | SSX       | SAGE1     | OCT2      | MAGEA4    | n.s.      | OCT2      | MAGEA4    | FGFR3     | Ki67      | MAGEA4    | SSX       | FGFR3     | n.s.      | MAGEA4    | n.s.      | n.s.      | n.s.      | n.s.      | n.s.      | MAGEA4    |                         |
| 1-2_C21   | Centre   | 0*        | 0         | 0         | 0         | 1         |           | 0         | 0*        | 0         | 0         | 1         | 0         | 0         |           | 0*        |           |           |           |           |           | 0         | 48                      |
|           |          | 1 cell    |           |           |           | 4 cells   |           |           | 1 cell    |           |           | 4 cells   |           |           |           | 3 cells   |           |           |           |           |           |           |                         |
|           |          | 75 μm     |           |           |           |           |           |           |           |           |           |           |           |           |           |           |           |           |           |           |           |           |                         |

**B**

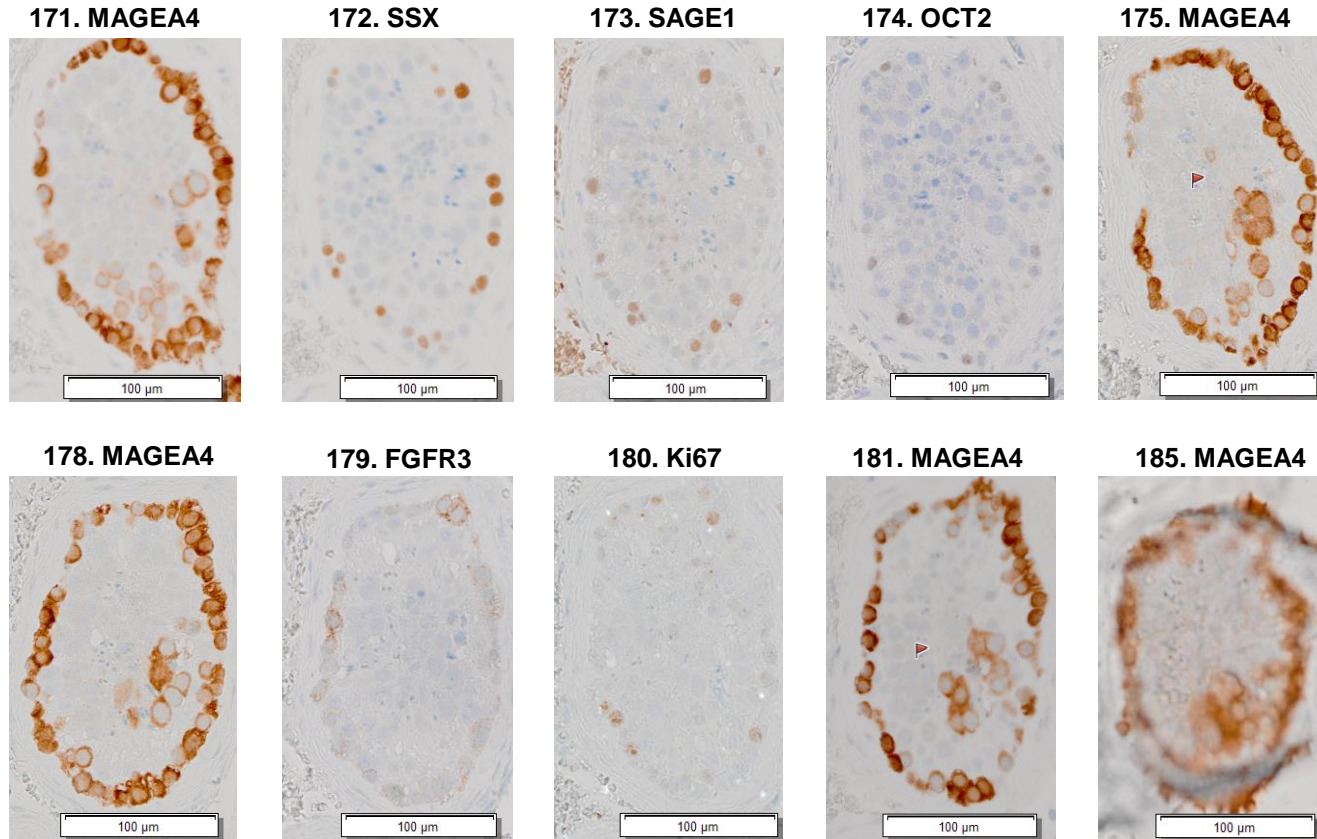

# Clone no. 1-2\_C22

**A**

| Clone no.  | Location | Slide 171 | Slide 172 | Slide 173 | Slide 174 | Slide 175 | Slide 176 | Slide 177 | Slide 178 | Slide 179 | Slide 180 | Slide 181 | Slide 182 | Slide 183 | Slide 184 | Slide 185 | Minimum number of cells |
|------------|----------|-----------|-----------|-----------|-----------|-----------|-----------|-----------|-----------|-----------|-----------|-----------|-----------|-----------|-----------|-----------|-------------------------|
|            |          | MAGEA4    | SSX       | SAGE1     | OCT2      | MAGEA4    | n.s       | OCT2      | MAGEA4    | FGFR3     | Ki67      | MAGEA4    | SSX       | FGFR3     | n.s       | MAGEA4    |                         |
| 1-2_C22    | Centre   | 0         | 0         | 0         | 0         | 1         |           | 0         | 1         | 0         | 0         | 1         | 0         |           |           | NA        | 57                      |
|            |          |           |           |           |           | 5 cells   |           |           | 11 cells  |           |           | 7 cells   |           |           |           |           |                         |
| 35 $\mu$ m |          |           |           |           |           |           |           |           |           |           |           |           |           |           |           |           |                         |

**B**

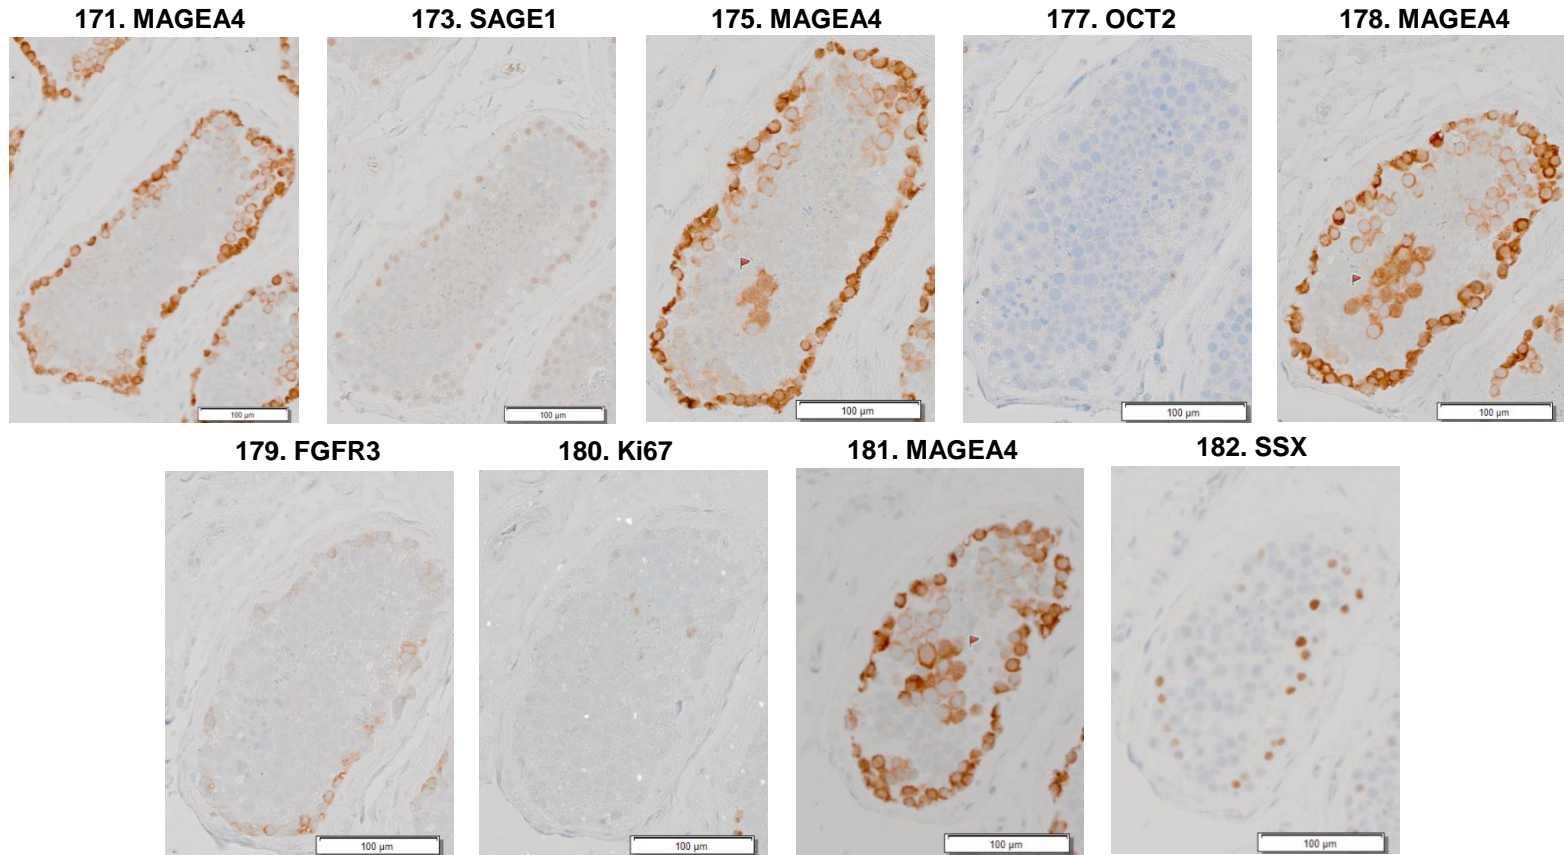

# Clone no. 1-2\_C23

**A**

| Clone no. | Location | Slide 171 | Slide 172 | Slide 173 | Slide 174 | Slide 175 | Slide 176 | Slide 177 | Slide 178 | Slide 179 | Slide 180 | Slide 181 | Minimum number of cells |
|-----------|----------|-----------|-----------|-----------|-----------|-----------|-----------|-----------|-----------|-----------|-----------|-----------|-------------------------|
|           |          | MAGEA4    | SSX       | SAGE1     | OCT2      | MAGEA4    | n.s       | OCT2      | MAGEA4    | FGFR3     | Ki67      | MAGEA4    |                         |
| 1-2_C23   | Centre   | NA        | NA        | NA        | 0         | 1         |           | 0         | 1         | 0         | 0         | NA        | 24                      |
|           |          |           |           |           |           | 5 cells   |           |           | 7 cells   |           |           |           |                         |
| 20 µm     |          |           |           |           |           |           |           |           |           |           |           |           |                         |

**B**

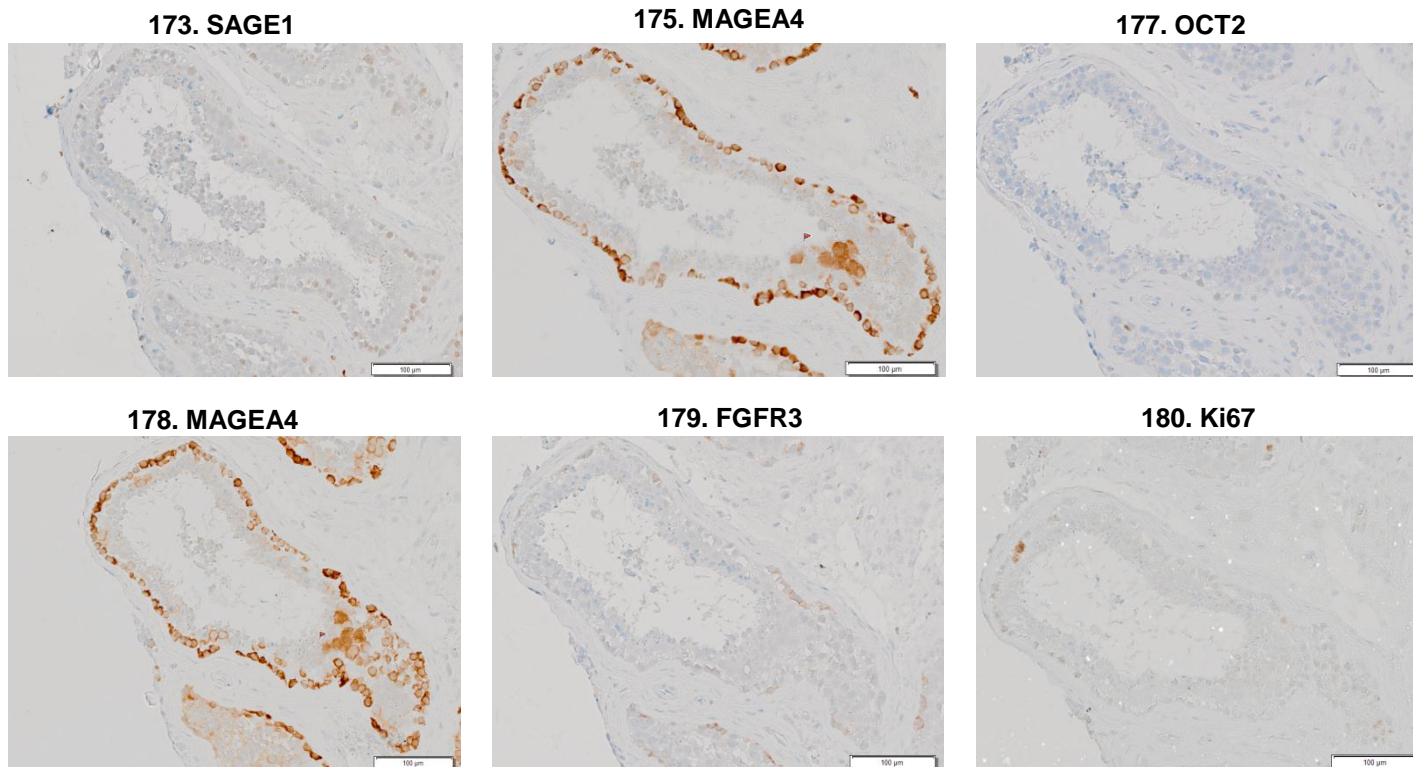

# Clone no. 1-2\_C24

**A**

| Clone no.  | Location  | Slide 171 | Slide 172 | Slide 173 | Slide 174 | Slide 175 | Slide 176 | Slide 177 | Slide 178 | Slide 179 | Slide 180 | Slide 181 | Slide 182 | Slide 183 | Slide 184 | Slide 185 | Minimum number of cells |
|------------|-----------|-----------|-----------|-----------|-----------|-----------|-----------|-----------|-----------|-----------|-----------|-----------|-----------|-----------|-----------|-----------|-------------------------|
|            |           | MAGEA4    | SSX       | SAGE1     | OCT2      | MAGEA4    | n.s       | OCT2      | MAGEA4    | FGFR3     | Ki67      | MAGEA4    | SSX       | FGFR3     | n.s       | MAGEA4    |                         |
| 1-2_C24    | Periphery | 0         | 0         | 0         | 0         | 1         |           | 0         | 1         | 0         | 0         | 1         | 0         |           |           | 0         | 83                      |
|            |           |           |           |           |           | 8 cells   |           |           | 13 cells  |           |           | 14 cells  |           |           |           |           |                         |
| 35 $\mu$ m |           |           |           |           |           |           |           |           |           |           |           |           |           |           |           |           |                         |

**B**

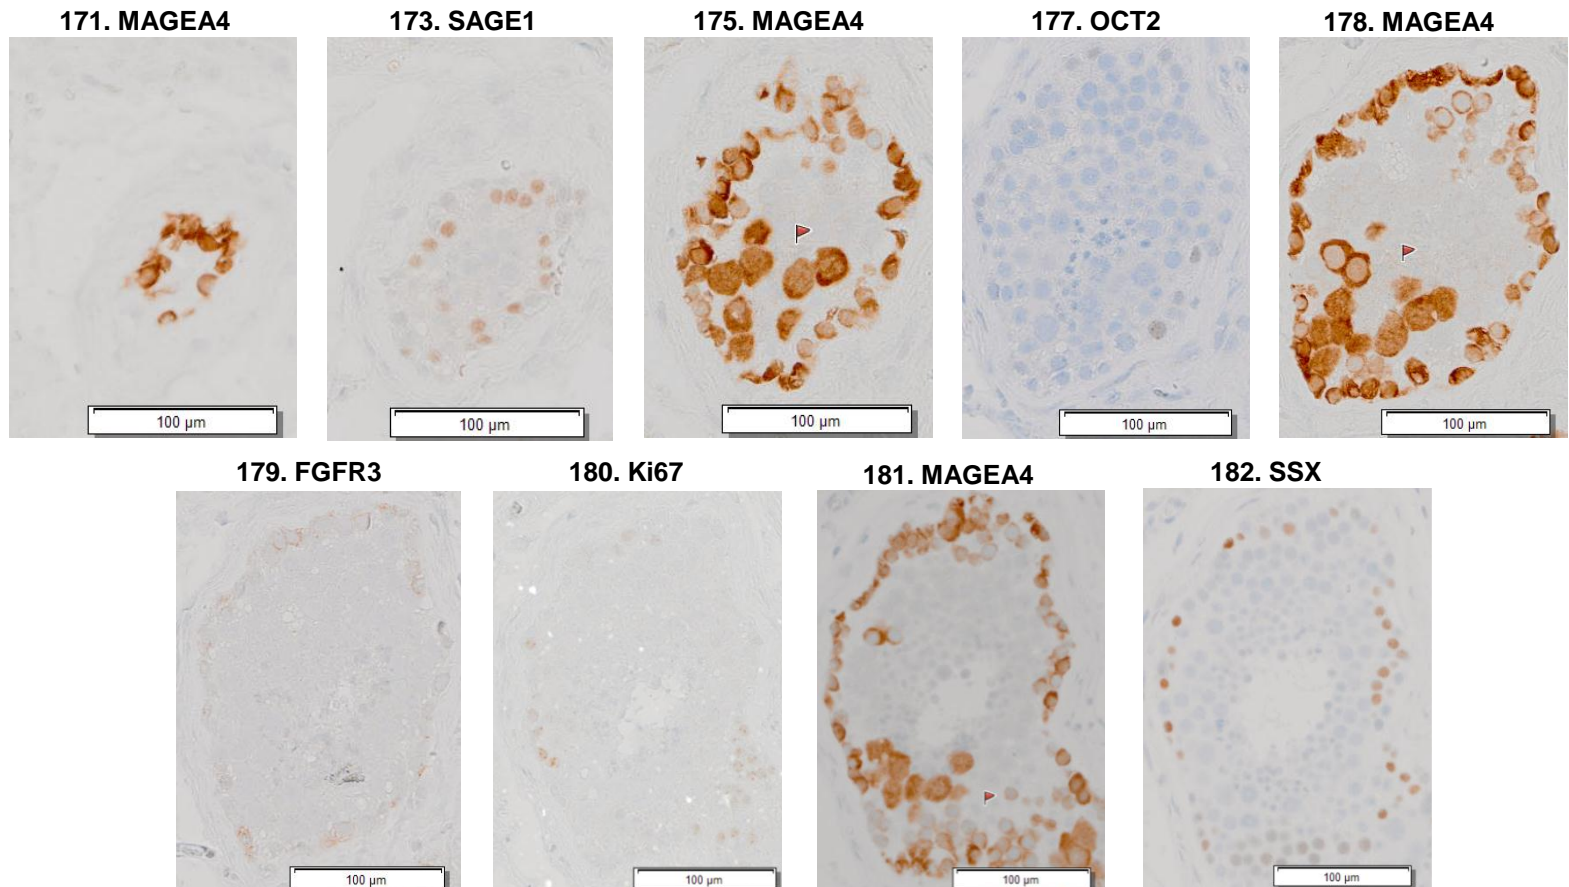

# Clone no. 1-2\_C25

**A**

| Clone no. | Location | Slide 170 | Slide 171 | Slide 172 | Slide 173 | Slide 174 | Slide 175 | Slide 176 | Slide 177 | Slide 178 | Slide 179 | Slide 180 | Slide 181 | Minimum number of cells |
|-----------|----------|-----------|-----------|-----------|-----------|-----------|-----------|-----------|-----------|-----------|-----------|-----------|-----------|-------------------------|
|           |          | Ki67      | MAGEA4    | SSX       | SAGE1     | OCT2      | MAGEA4    | n.s       | OCT2      | MAGEA4    | FGFR3     | Ki67      | MAGEA4    |                         |
| 1-2_C25   | Centre   | 0         | 0*        | 0         | 0         | 0         | 1         |           | 0         | 1         | 0         |           | 0         | 30                      |
|           |          |           | 2 cells   |           |           |           | 4 cells   |           |           | 5 cells   |           |           |           |                         |
| 40 µm     |          |           |           |           |           |           |           |           |           |           |           |           |           |                         |

**B**

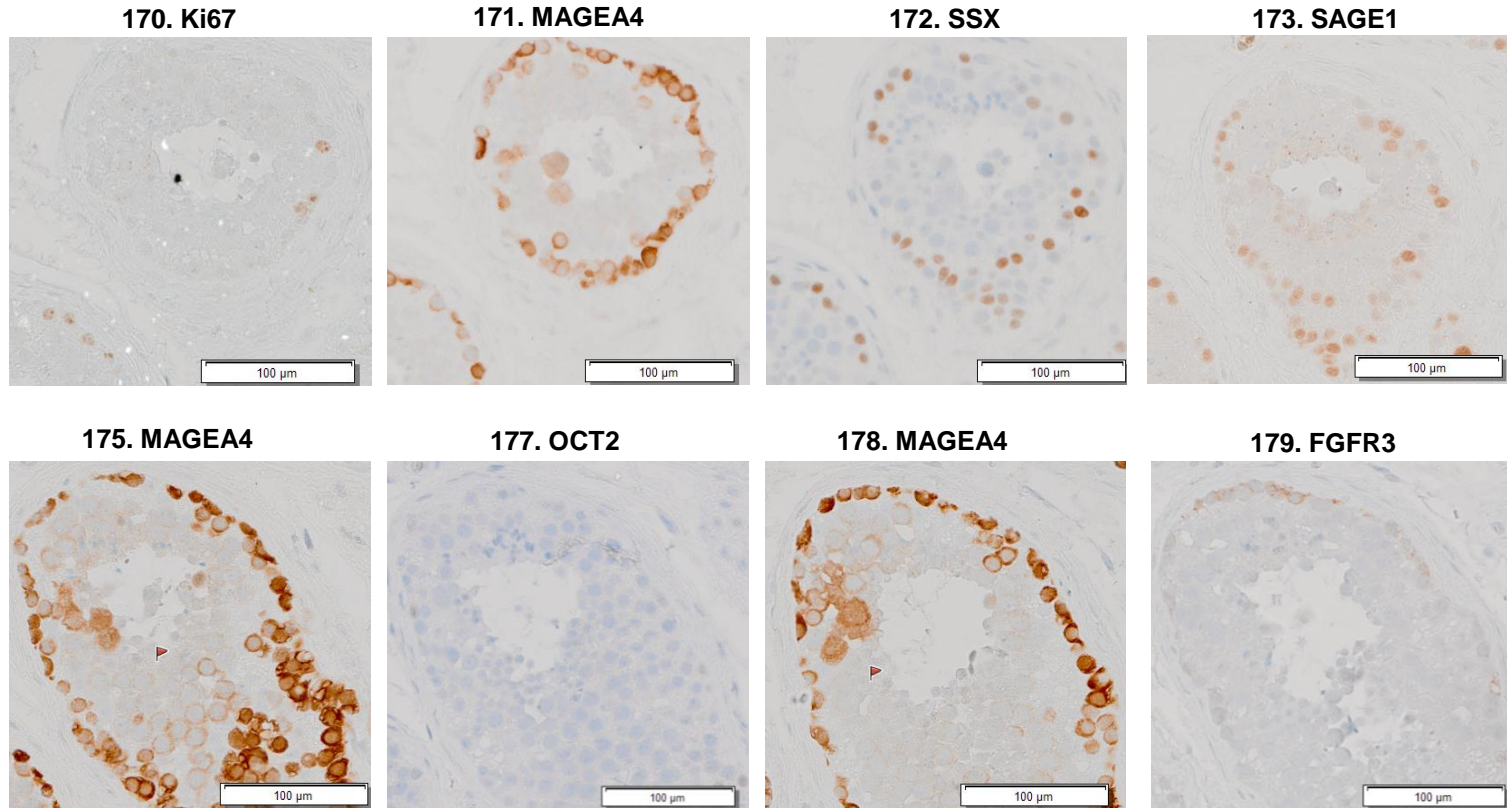

# Clone no. 1-2\_C26

**A**

| Clone no. | Location  | Slide 171 | Slide 172 | Slide 173 | Slide 174 | Slide 175 | Slide 176 | Slide 177 | Slide 178 | Slide 179 | Slide 180 | Slide 181 | Slide 182 | Slide 183 | Slide 184 | Slide 185 | Minimum number of cells |
|-----------|-----------|-----------|-----------|-----------|-----------|-----------|-----------|-----------|-----------|-----------|-----------|-----------|-----------|-----------|-----------|-----------|-------------------------|
|           |           | MAGEA4    | SSX       | SAGE1     | OCT2      | MAGEA4    | n.s       | OCT2      | MAGEA4    | FGFR3     | Ki67      | MAGEA4    | SSX       | FGFR3     | n.s       | MAGEA4    |                         |
| 1-2_C26   | Periphery | 0         | 0         | 0         | 0         | 1         |           | 0         | 1         | 0         | 0         | 1         | 0         |           |           | 0*        | 89                      |
|           |           |           |           |           |           | 5 cells   |           |           | 7 cells   |           |           |           | 15 cells  |           |           |           |                         |
| 55 μm     |           |           |           |           |           |           |           |           |           |           |           |           |           |           |           |           |                         |

**B**

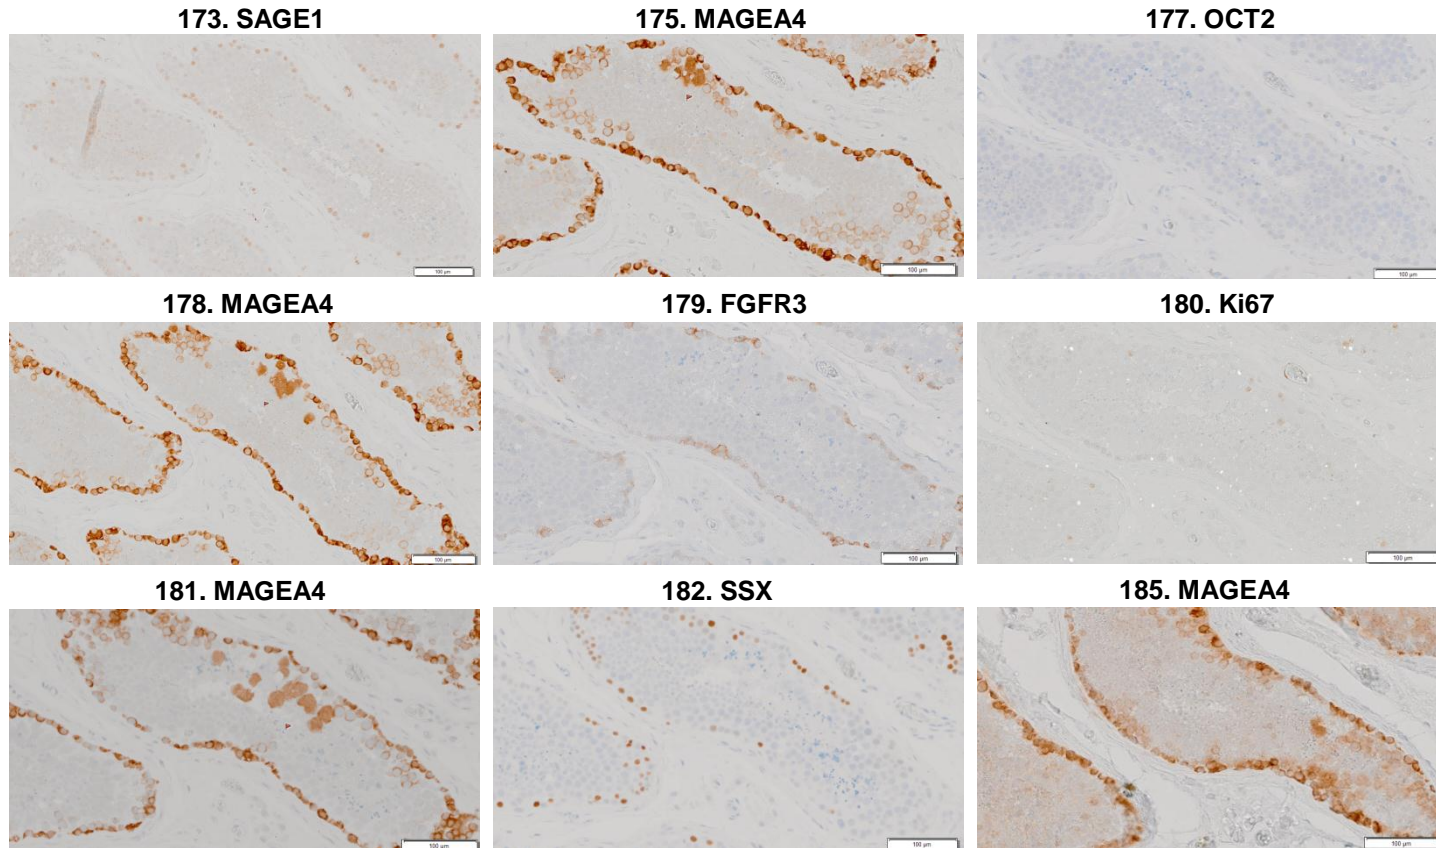



# Clone no. 1-2\_C27

**A**

| Clone no.  | Location       | Slide 168 | Slide 169 | Slide 170 | Slide 171 | Slide 172 | Slide 173 | Slide 174 | Slide 175 | Slide 176 | Slide 177 | Slide 178 | Slide 179 | Slide 180 | Slide 181 | Minimum number of cells |
|------------|----------------|-----------|-----------|-----------|-----------|-----------|-----------|-----------|-----------|-----------|-----------|-----------|-----------|-----------|-----------|-------------------------|
|            |                | MAGEA4    | FGFR3     | Ki67      | MAGEA4    | SSX       | SAGE1     | OCT2      | MAGEA4    | n.s       | OCT2      | MAGEA4    | FGFR3     | Ki67      | MAGEA4    |                         |
| 1-2_C27    | Near Periphery | 1         | 0         | 0         | 1         | 0         | 0         | 0         | 1         |           | 0         | 1         | 0         |           | 0         | 47                      |
|            |                | 6 cells   |           |           | 4 cells   |           |           |           | 3 cells   |           |           | 5 cells   |           |           |           |                         |
| 55 $\mu$ m |                |           |           |           |           |           |           |           |           |           |           |           |           |           |           |                         |

**B**

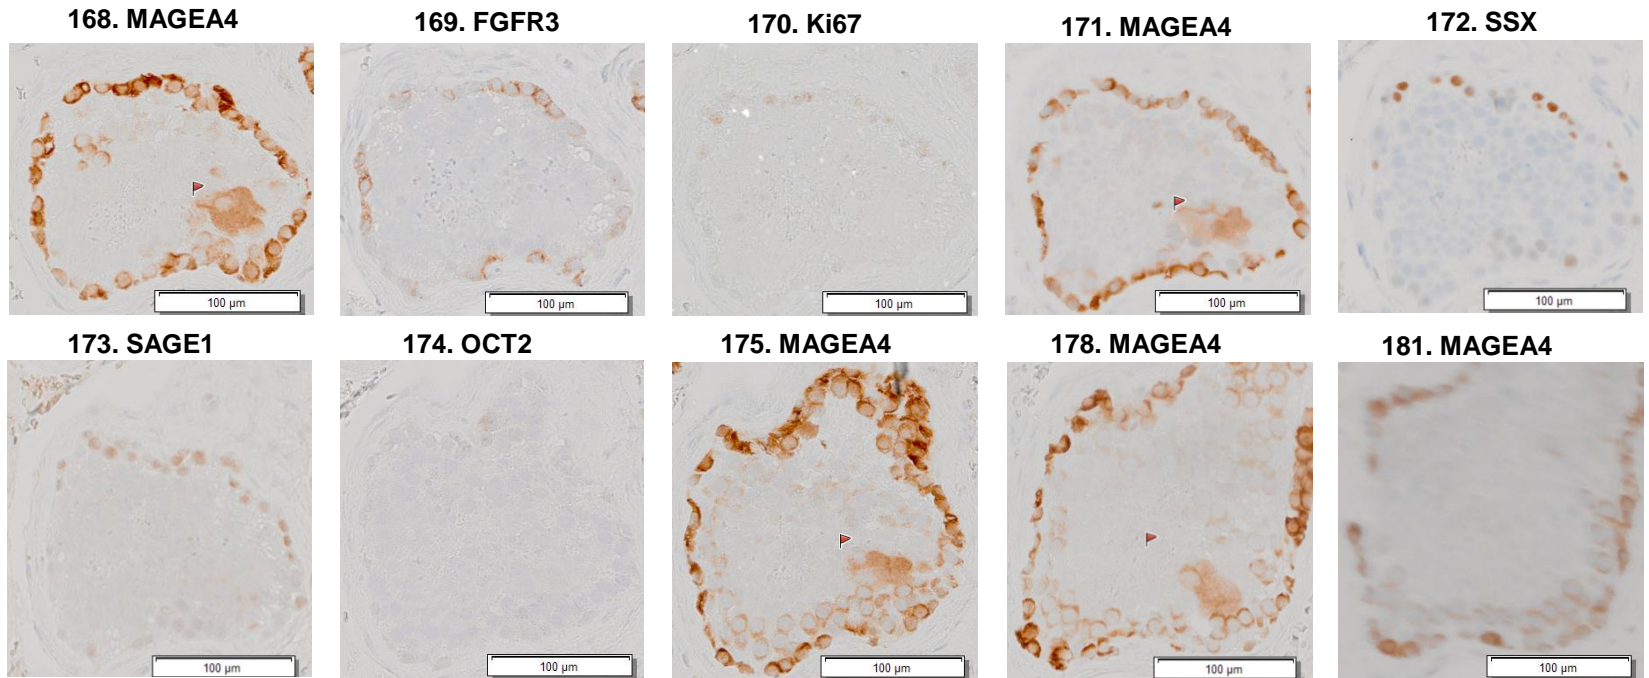

# Clone no. 1-2\_C28

**A**

| Clone no. | Location       | Slide 168 | Slide 169 | Slide 170 | Slide 171    | Slide 172 | Slide 173 | Slide 174 | Slide 175    | Slide 176 | Slide 177 | Slide 178    | Slide 179 | Slide 180 | Slide 181 | Minimum number of cells |
|-----------|----------------|-----------|-----------|-----------|--------------|-----------|-----------|-----------|--------------|-----------|-----------|--------------|-----------|-----------|-----------|-------------------------|
|           |                | MAGEA4    | FGFR3     | Ki67      | MAGEA4       | SSX       | SAGE1     | OCT2      | MAGEA4       | n.s       | OCT2      | MAGEA4       | FGFR3     | Ki67      | MAGEA4    |                         |
| 1-2_C28   | Near Periphery | 0         |           | 0         | 1<br>3 cells | 0         | 0         | 0         | 1<br>4 cells |           | 0         | 1<br>3 cells | 0         |           | 0         | 28                      |
| 40 μm     |                |           |           |           |              |           |           |           |              |           |           |              |           |           |           |                         |

**B**

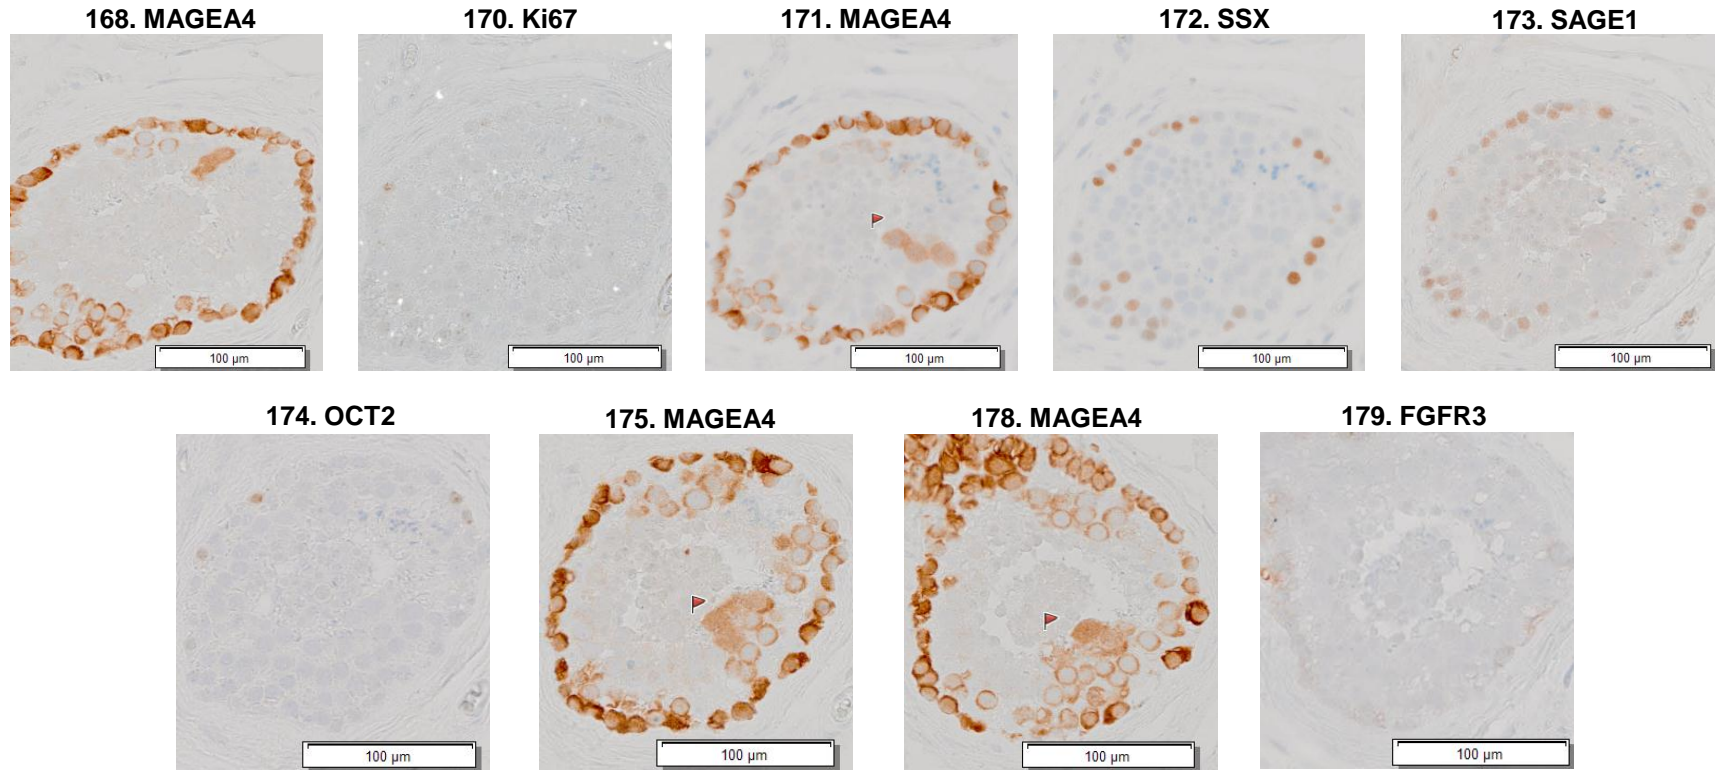

# Clone no. 1-2\_C29

**A**

| Clone no. | Location       | Slide 171 | Slide 172 | Slide 173 | Slide 174 | Slide 175 | Slide 176  | Slide 177 | Slide 178 | Slide 179 | Slide 180 | Slide 181 | Minimum number of cells |
|-----------|----------------|-----------|-----------|-----------|-----------|-----------|------------|-----------|-----------|-----------|-----------|-----------|-------------------------|
|           |                | MAGEA4    | SSX       | SAGE1     | OCT2      | MAGEA4    | n.s        | OCT2      | MAGEA4    | FGFR3     | Ki67      | MAGEA4    |                         |
| 1-2_C29   | Near Periphery | 0         | 0         | 0         | 0         | 1         |            | 0         | 1         | 0         |           | 0         | 18                      |
|           |                |           |           |           |           | 6 cells   | 20 $\mu$ m |           |           | 3 cells   |           |           |                         |

**B**

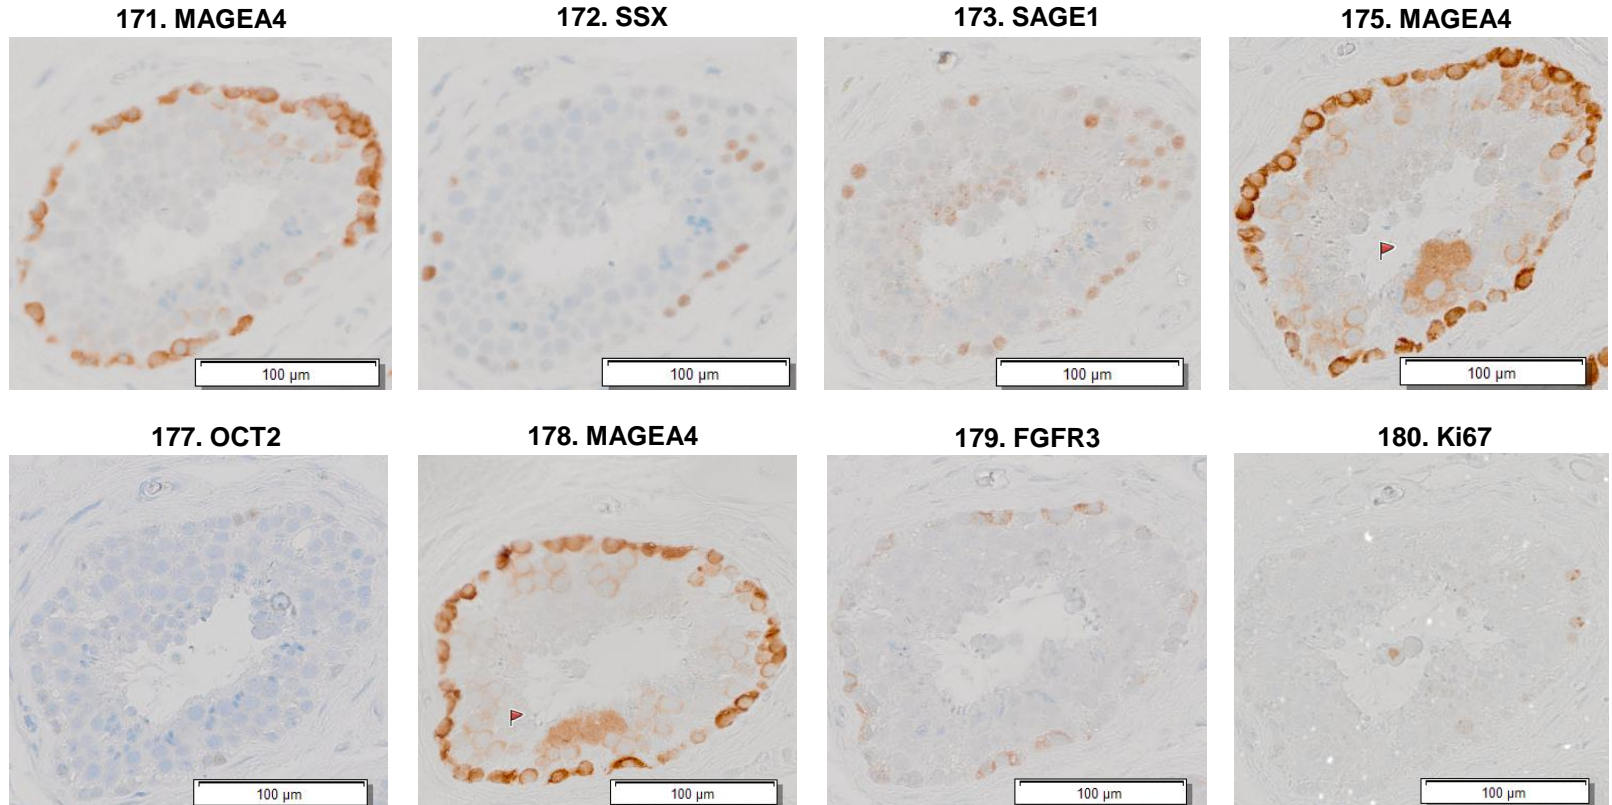

# Clone no. 1-2\_C30

**A**

| Clone no. | Location | Slide 175 | Slide 176 | Slide 177 | Slide 178 | Slide 179 | Slide 180 | Slide 181  | Slide 182 | Slide 183 | Slide 184 | Slide 185 | Minimum number of cells |
|-----------|----------|-----------|-----------|-----------|-----------|-----------|-----------|------------|-----------|-----------|-----------|-----------|-------------------------|
|           |          | MAGEA4    | n.s       | OCT2      | MAGEA4    | FGFR3     | Ki67      | MAGEA4     | SSX       | FGFR3     | n.s       | MAGEA4    |                         |
| 1-2_C30   | Centre   | NA        |           | 0         | 1         | 0         | 0         | 1          | 0         |           |           | NA        | 22                      |
|           |          |           |           |           | 6 cells   |           |           | 20 $\mu$ m |           |           |           |           |                         |

**B**

175. MAGEA4

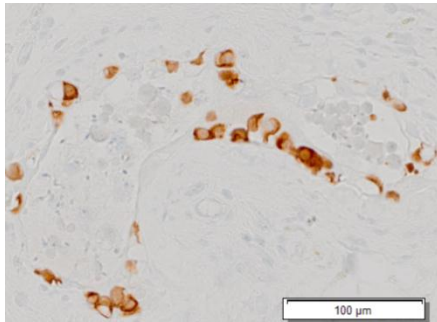

177. OCT2

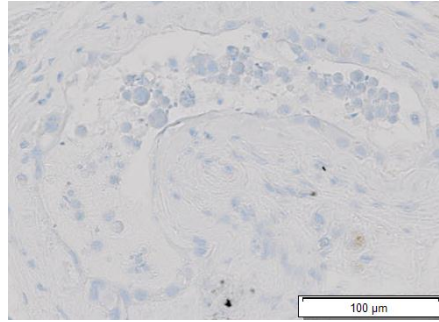

178. MAGEA4

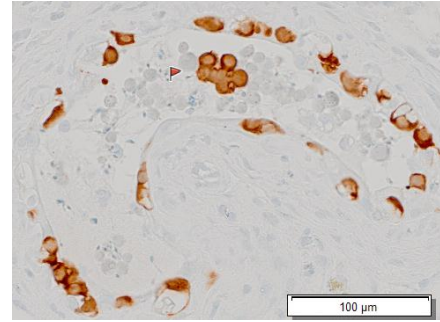

179. FGFR3

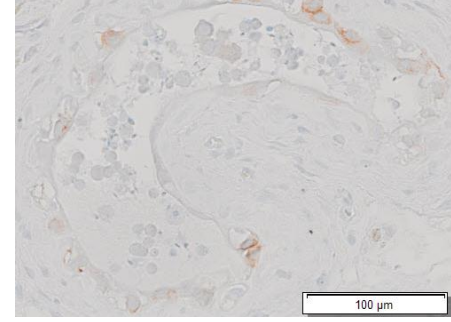

180. Ki67

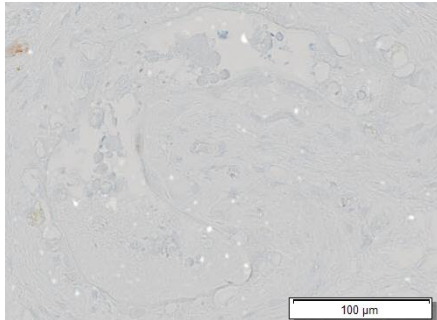

181. MAGEA4

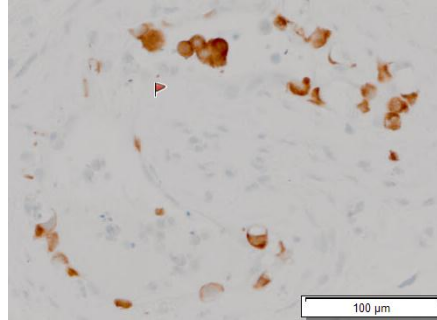

182. SSX

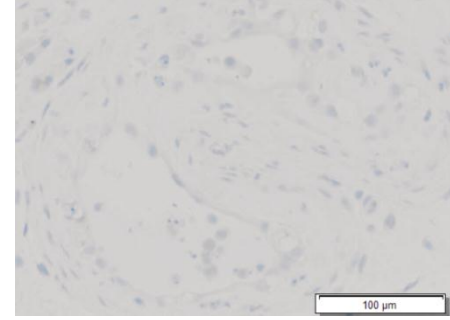

# Clone no. 1-2\_C31

**A**

| Clone no.  | Location | Slide 171 | Slide 172 | Slide 173 | Slide 174 | Slide 175 | Slide 176 | Slide 177 | Slide 178 | Slide 179 | Slide 180 | Slide 181 | Minimum number of cells |
|------------|----------|-----------|-----------|-----------|-----------|-----------|-----------|-----------|-----------|-----------|-----------|-----------|-------------------------|
|            |          | MAGEA4    | SSX       | SAGE1     | OCT2      | MAGEA4    | n.s       | OCT2      | MAGEA4    | FGFR3     | Ki67      | MAGEA4    |                         |
| 1-2_C31    | Centre   | 0         | 0         | 0         | 0         | 1         |           | 0         | 1         | 0         | 0         | 0         | 26                      |
|            |          |           |           |           |           | 6 cells   |           |           | 7 cells   |           |           |           |                         |
| 20 $\mu$ m |          |           |           |           |           |           |           |           |           |           |           |           |                         |

**B**

171. MAGEA4

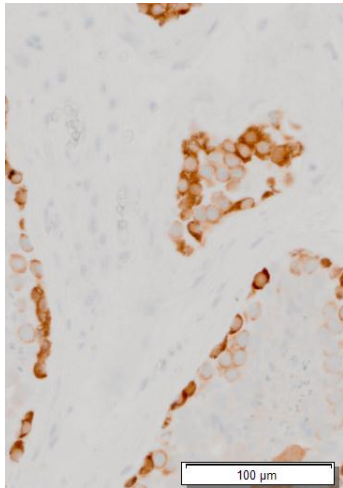

172. SSX

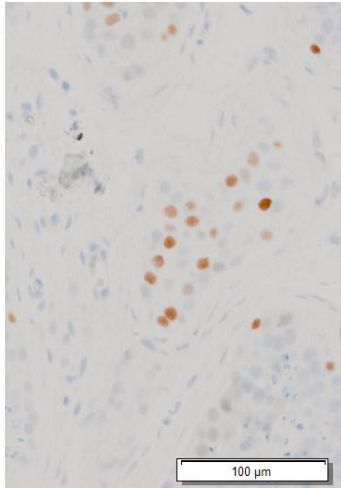

173. SAGE1

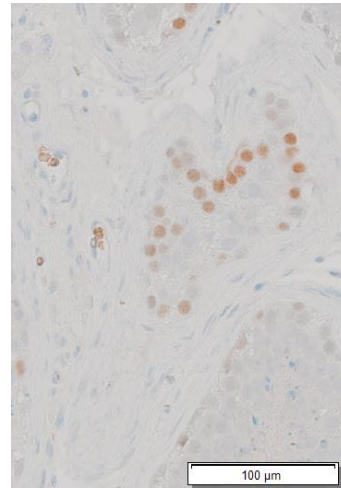

175. MAGEA4

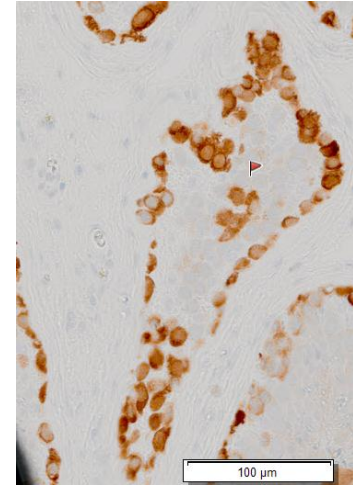

177. OCT2

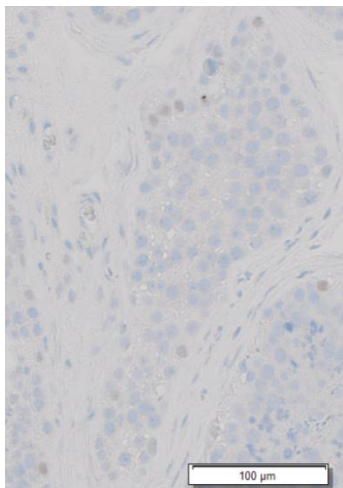

178. MAGEA4

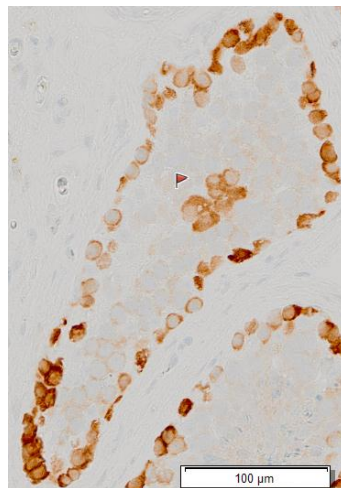

179. FGFR3

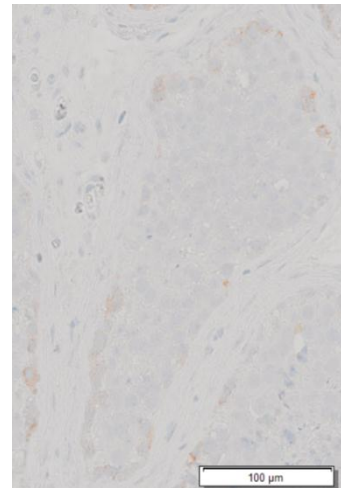

180. Ki67

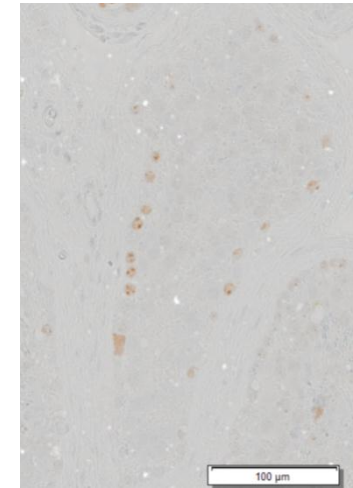

# Clone no. 1-2\_C32

**A**

| Clone no. | Location       | Slide 175 | Slide 176 | Slide 177 | Slide 178 | Slide 179 | Slide 180 | Slide 181 | Slide 182 | Slide 183 | Slide 184 | Slide 185 | Minimum number of cells |
|-----------|----------------|-----------|-----------|-----------|-----------|-----------|-----------|-----------|-----------|-----------|-----------|-----------|-------------------------|
|           |                | MAGEA4    | n.s       | OCT2      | MAGEA4    | FGFR3     | Ki67      | MAGEA4    | SSX       | FGFR3     | n.s       | MAGEA4    |                         |
| 1-2_C32   | Near Periphery | NA        |           | 0         | 1         | 0         | 0         | 1         | 0         |           |           | NA        | 18                      |
|           |                |           |           |           | 6 cells   |           |           | 3 cells   |           |           |           |           |                         |
|           |                | 20 μm     |           |           |           |           |           |           |           |           |           |           |                         |

**B**

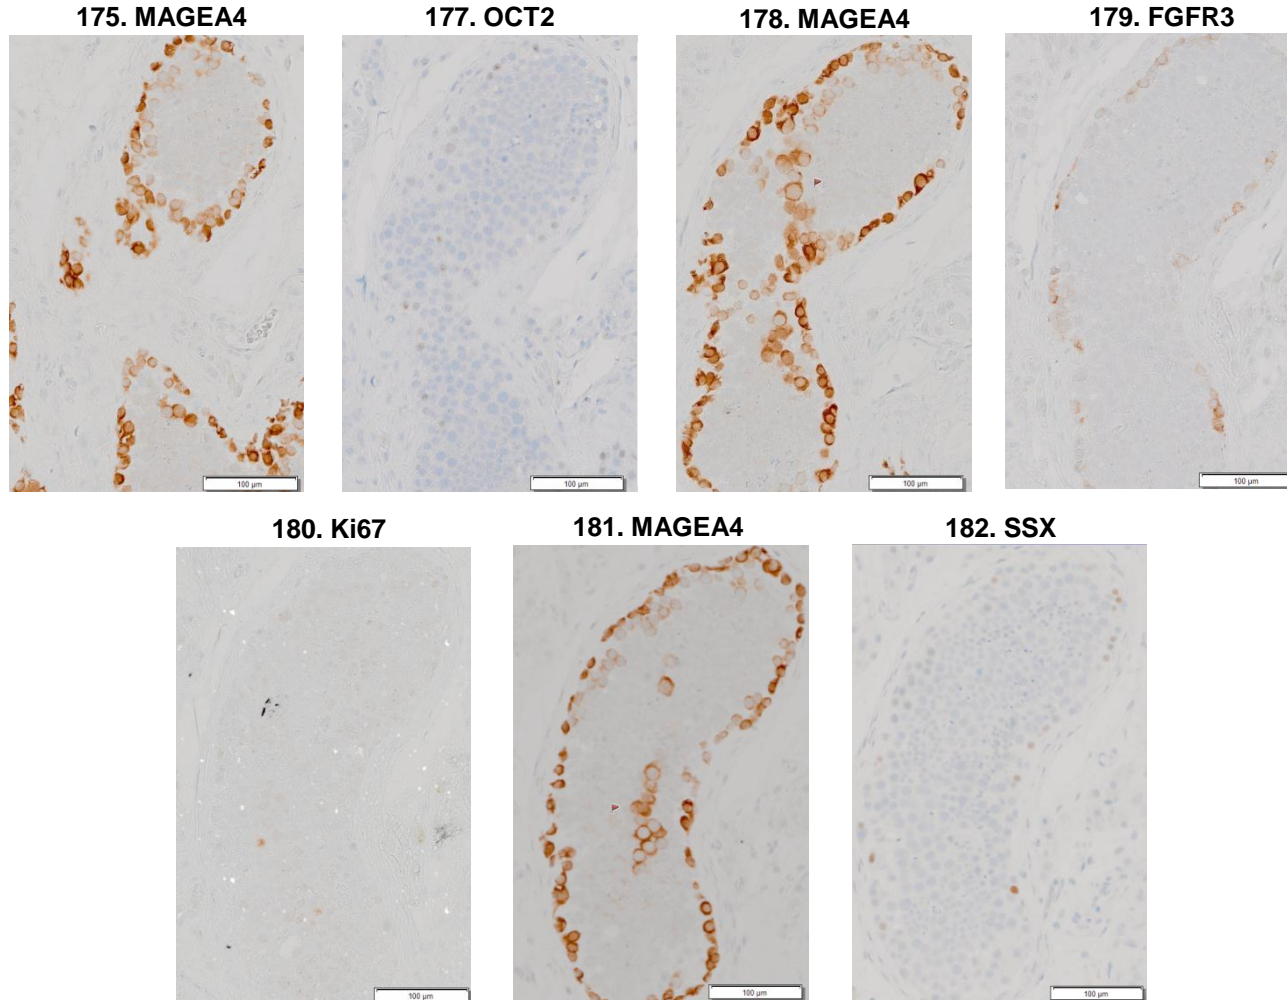

# Clone no. 1-2\_C33

**A**

| Clone no. | Location | Slide 175 | Slide 176 | Slide 177 | Slide 178 | Slide 179 | Slide 180 | Slide 181 | Slide 182 | Slide 183 | Slide 184 | Slide 185 | Minimum number of cells |
|-----------|----------|-----------|-----------|-----------|-----------|-----------|-----------|-----------|-----------|-----------|-----------|-----------|-------------------------|
|           |          | MAGEA4    | n.s       | OCT2      | MAGEA4    | FGFR3     | Ki67      | MAGEA4    | SSX       | FGFR3     | n.s       | MAGEA4    |                         |
| 1-2_C33   | Centre   | 0         |           | 0         | 1         | 0         | 0         | 0*        | 1         |           |           | 0         | 17                      |
|           |          |           |           |           | 5 cells   |           |           | 2 cells   | 3 cells   |           |           |           |                         |
| 25 µm     |          |           |           |           |           |           |           |           |           |           |           |           |                         |

**B**

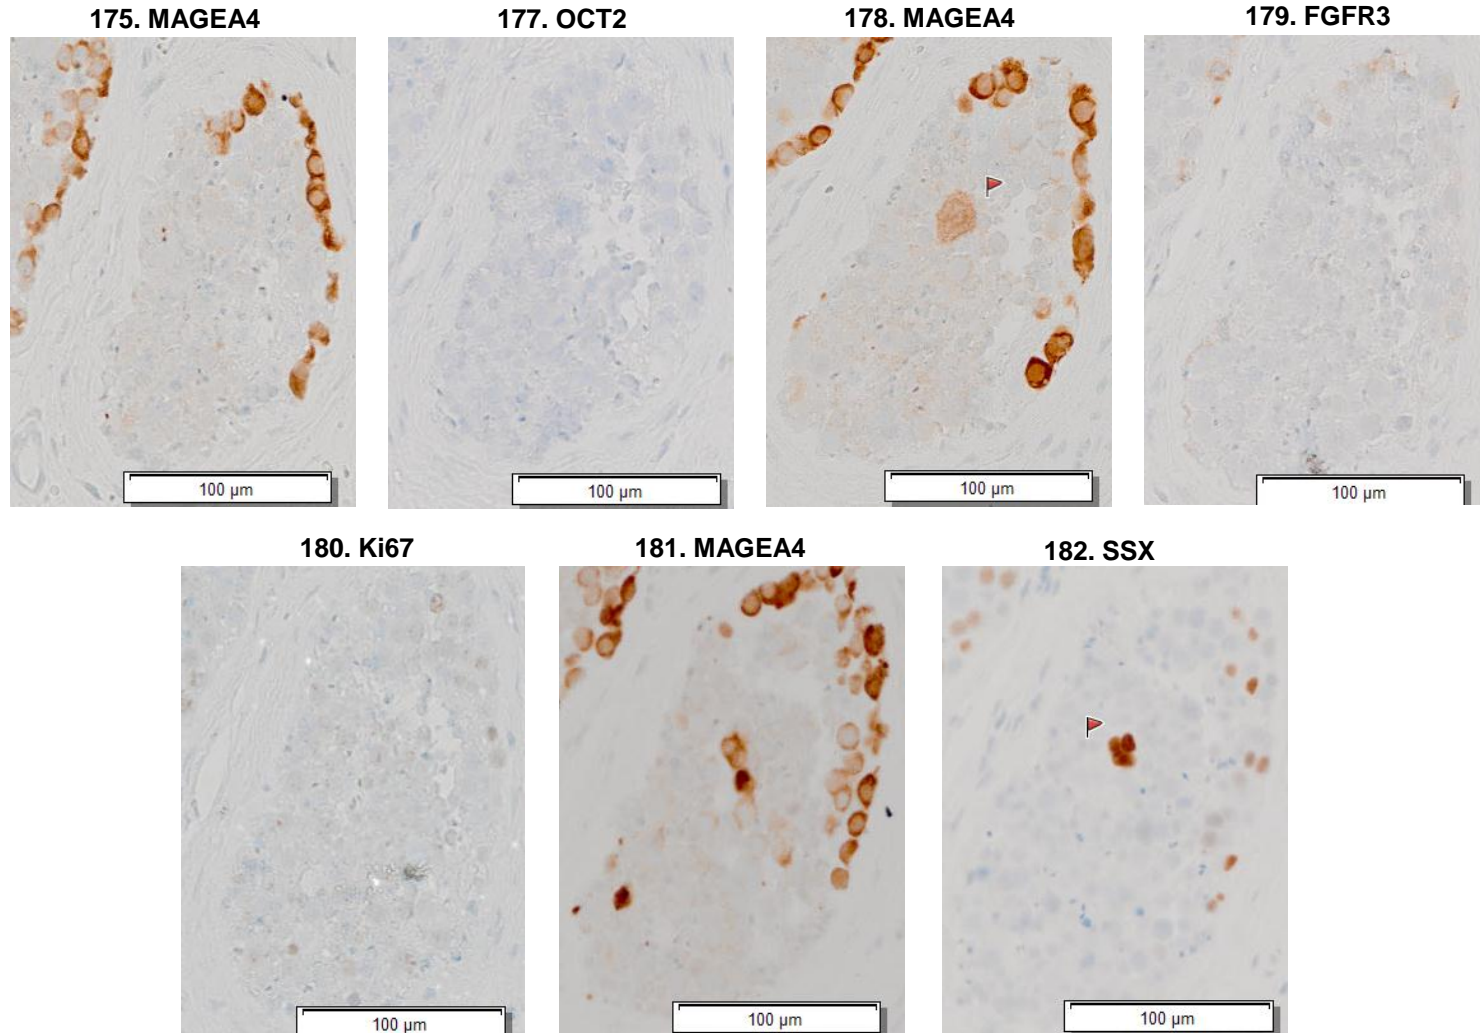

## Clone no. 1-2\_C34

**A**

| Clone no. | Location | Slide 175 | Slide 176 | Slide 177 | Slide 178 | Slide 179 | Slide 180 | Slide 181 | Slide 182 | Slide 183 | Slide 184 | Slide 185 | Minimum number of cells |
|-----------|----------|-----------|-----------|-----------|-----------|-----------|-----------|-----------|-----------|-----------|-----------|-----------|-------------------------|
|           |          | MAGEA4    | n.s       | OCT2      | MAGEA4    | FGFR3     | Ki67      | MAGEA4    | SSX       | FGFR3     | n.s       | MAGEA4    |                         |
| 1-2_C34   | Centre   | 0         |           | 0         | 1         | 0         | 0         | 1         | 0         |           |           | 0         | 38                      |
|           |          |           |           |           | 13 cells  |           |           | 6 cells   |           |           |           |           |                         |
|           |          |           |           |           | 20 μm     |           |           |           |           |           |           |           |                         |

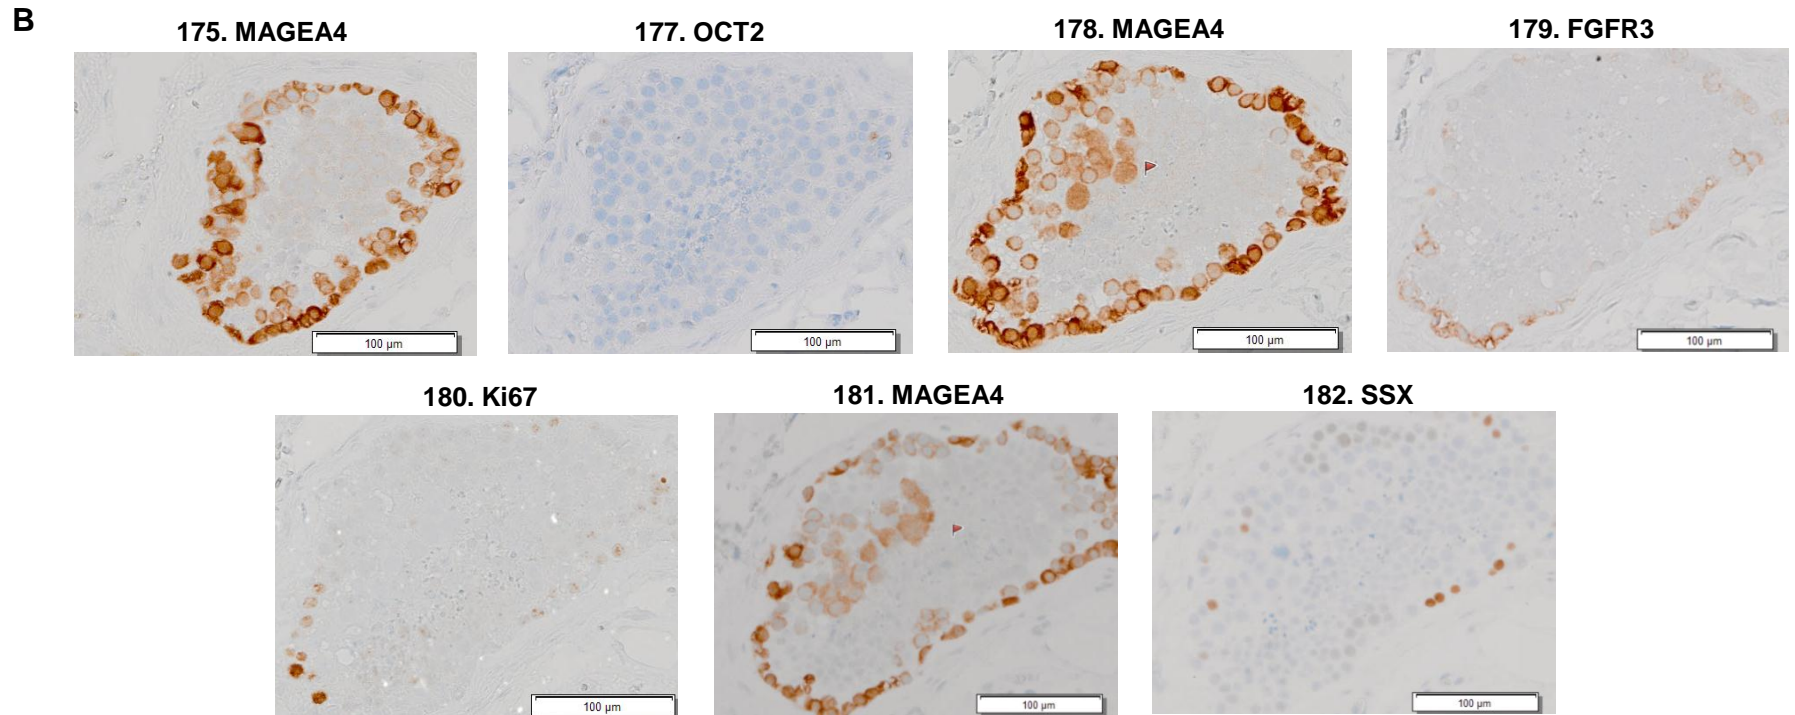



# Clone no. 1-2\_ C35

**A**

| Clone no. | Location | Slide 178 | Slide 179 | Slide 180 | Slide 181  | Slide 182 | Slide 183 | Slide 184 | Slide 185 | Minimum number of cells |
|-----------|----------|-----------|-----------|-----------|------------|-----------|-----------|-----------|-----------|-------------------------|
|           |          | MAGEA4    | FGFR3     | Ki67      | MAGEA4     | SSX       | FGFR3     | n.s       | MAGEA4    |                         |
| 1-2_C35   | Centre   | NA        | 0         | 0         | 1          | 1         | NA        |           | NA        | 20                      |
|           |          |           |           |           | 13 cells   | 7 cells   |           |           |           |                         |
|           |          |           |           |           | 10 $\mu$ m |           |           |           |           |                         |

**B**

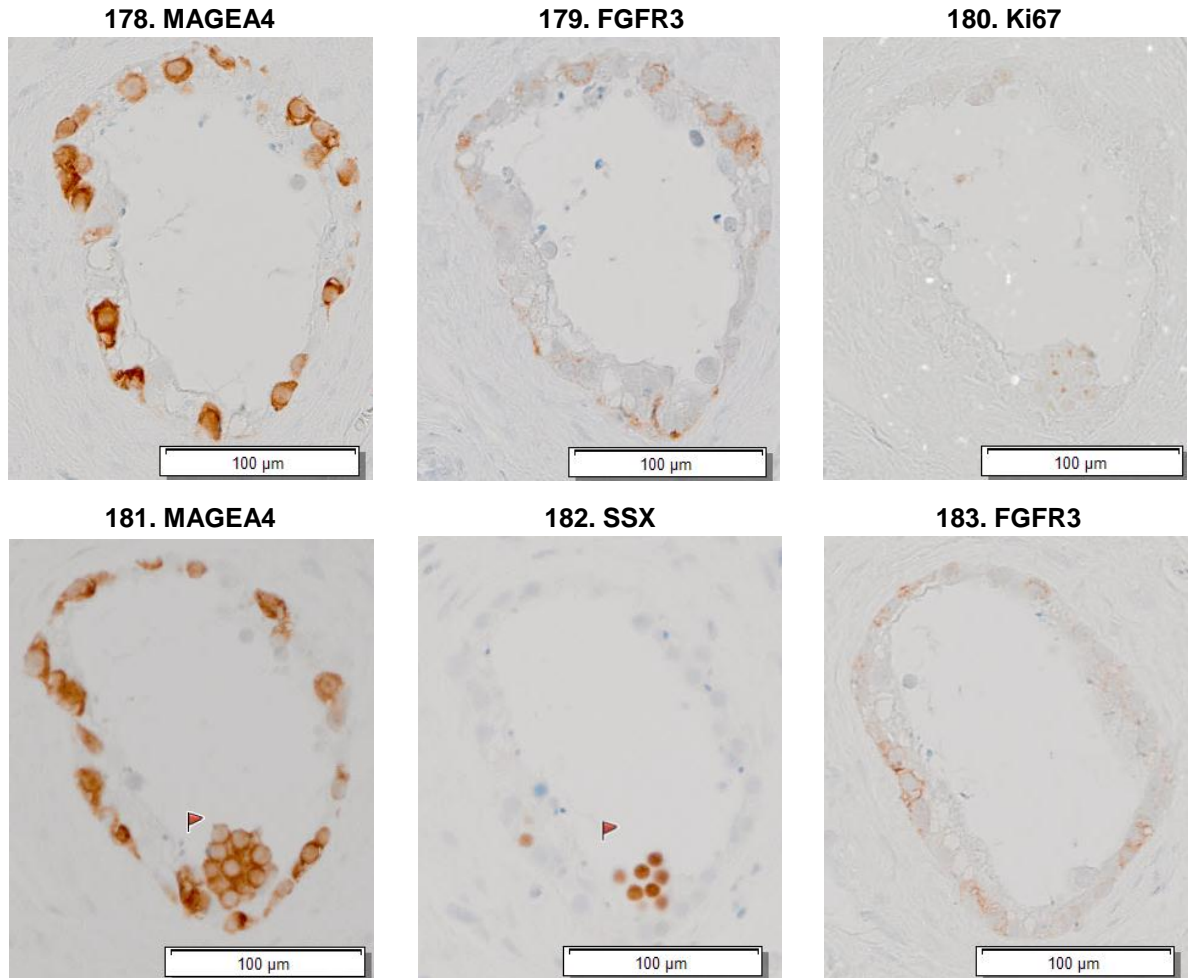

# Clone no. 1-2\_C36

**A**

| Clone no. | Location  | Slide 175 | Slide 176 | Slide 177 | Slide 178 | Slide 179 | Slide 180 | Slide 181 | Slide 182 | Slide 183 | Slide 184 | Slide 185 | Minimum number of cells |
|-----------|-----------|-----------|-----------|-----------|-----------|-----------|-----------|-----------|-----------|-----------|-----------|-----------|-------------------------|
|           |           | MAGEA4    | n.s       | OCT2      | MAGEA4    | FGFR3     | Ki67      | MAGEA4    | SSX       | FGFR3     | n.s       | MAGEA4    |                         |
| 1-2_C36   | Periphery | 0*        |           | 0         | 1         | 0         | 0         | 1         | 0*        | 0         |           | 0         | 73                      |
|           |           | 3 cells   |           |           | 14 cells  |           |           | 10 cells  | 5 cells   |           |           |           |                         |
| 40 μm     |           |           |           |           |           |           |           |           |           |           |           |           |                         |

**B**

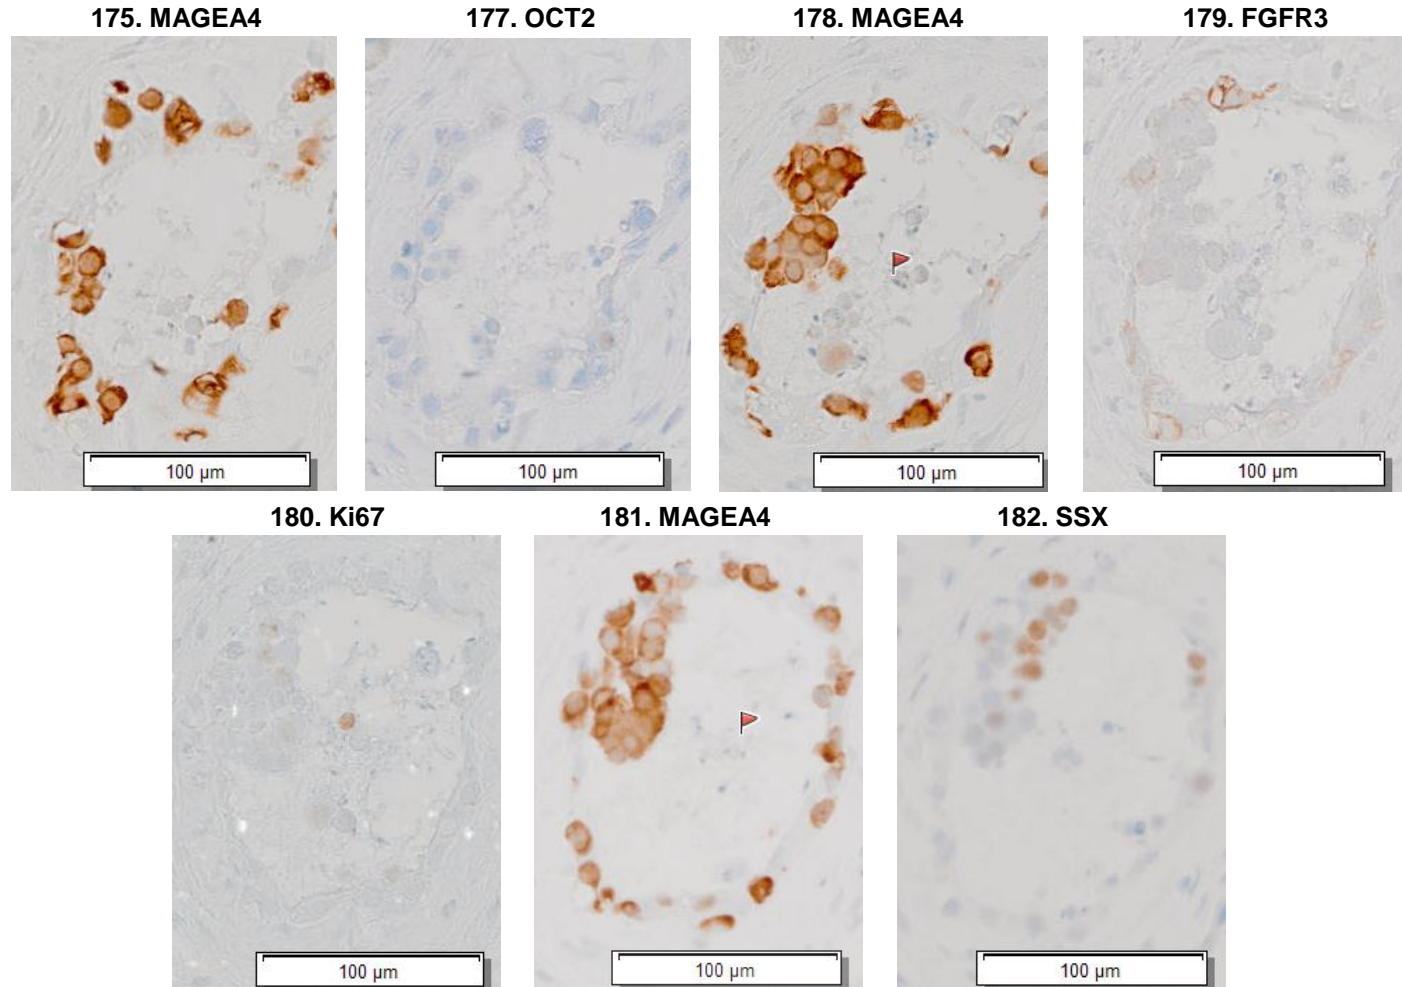

# Clone no. 1-2\_C37

**A**

| Clone no. | Location | Slide 175 | Slide 176 | Slide 177 | Slide 178 | Slide 179 | Slide 180 | Slide 181 | Slide 182 | Slide 183 | Slide 184 | Slide 185 | Minimum number of cells |
|-----------|----------|-----------|-----------|-----------|-----------|-----------|-----------|-----------|-----------|-----------|-----------|-----------|-------------------------|
|           |          | MAGEA4    | n.s       | OCT2      | MAGEA4    | FGFR3     | Ki67      | MAGEA4    | SSX       | FGFR3     | n.s       | MAGEA4    |                         |
| 1-2_C37   | Centre   | 0         |           | 0         | 1         | 0         | 0         | 1         | 0         | 0         |           | 0         | 26                      |
|           |          |           |           |           | 7 cells   | 20 µm     |           |           | 6 cells   |           |           |           |                         |

**B**

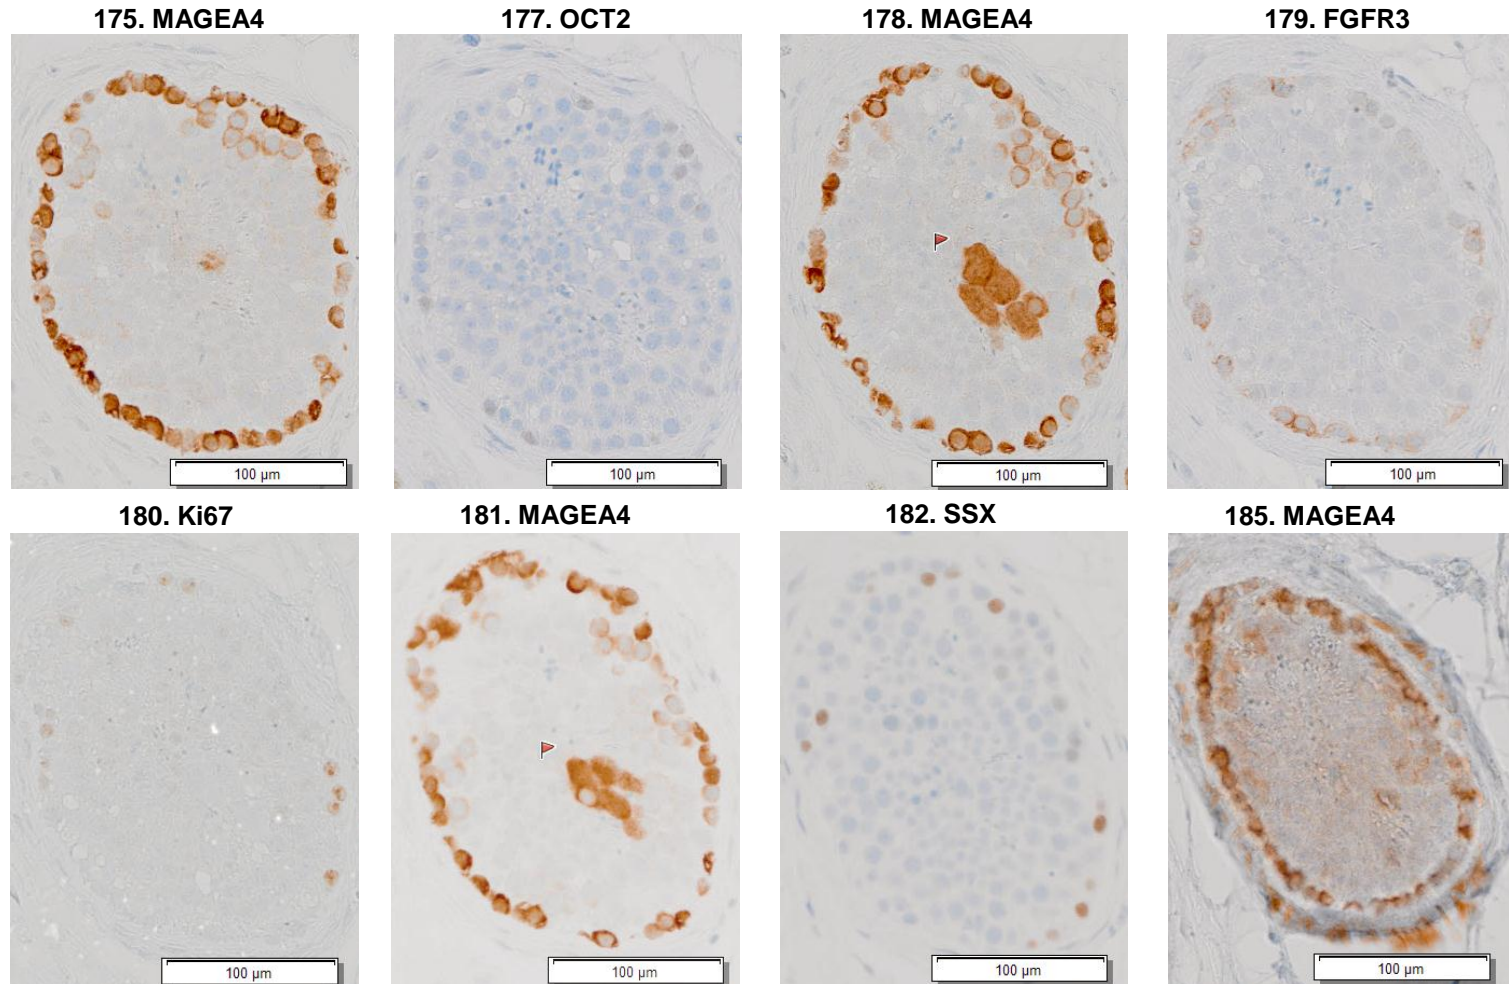

# Clone no. 1-2\_C38

**A**

| Clone no. | Location       | Slide 178 | Slide 179 | Slide 180 | Slide 181 | Slide 182 | Slide 183 | Slide 184 | Slide 185 | Slide 186 | Slide 187 | Slide 188 | Slide 189 | Slide 190 | Slide 191 | Minimum number of cells |
|-----------|----------------|-----------|-----------|-----------|-----------|-----------|-----------|-----------|-----------|-----------|-----------|-----------|-----------|-----------|-----------|-------------------------|
|           |                | MAGEA4    | FGFR3     | Ki67      | MAGEA4    | SSX       | FGFR3     | n.s       | MAGEA4    | n.s       | n.s       | n.s       | n.s       | n.s       | MAGEA4    |                         |
| 1-2_C38   | Near Periphery | 0         |           | 0         | 1         | 0         | 0         |           | 1         |           |           |           |           |           | 0         | 33                      |
|           |                |           |           |           | 4 cells   |           |           |           | 9 cells   |           |           |           |           |           |           |                         |
| 25 μm     |                |           |           |           |           |           |           |           |           |           |           |           |           |           |           |                         |

**B**

**178. MAGEA4**

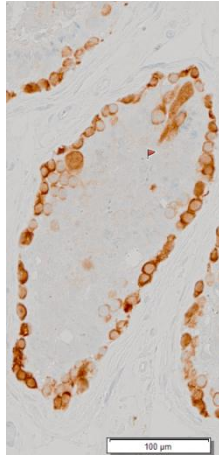

**180. Ki67**

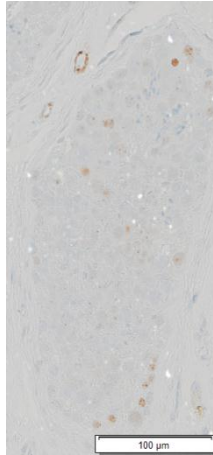

**181. MAGEA4**

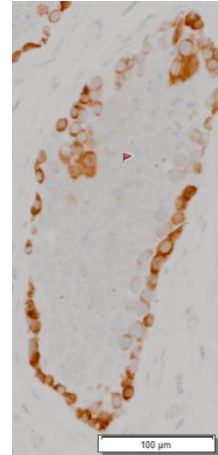

**182. SSX**

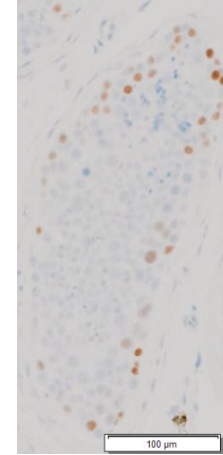

**183. FGFR3**

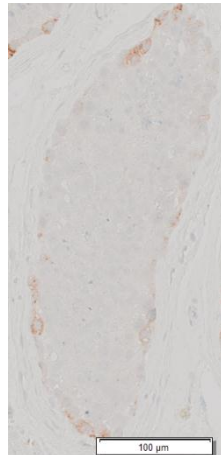

**185. MAGEA4**

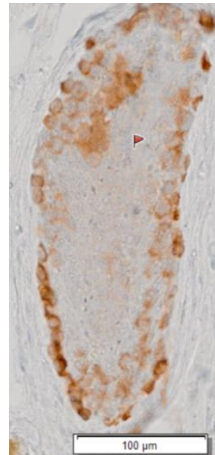

**191. MAGEA4**

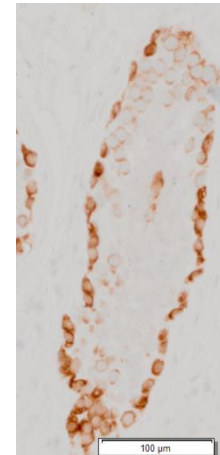

# Clone no. 1-2\_C39

**A**

| Clone no. | Location       | Slide 178 | Slide 179 | Slide 180 | Slide 181 | Slide 182 | Slide 183 | Slide 184 | Slide 185 | Slide 186 | Slide 187 | Slide 188 | Slide 189 | Slide 190 | Slide 191 | Minimum number of cells |
|-----------|----------------|-----------|-----------|-----------|-----------|-----------|-----------|-----------|-----------|-----------|-----------|-----------|-----------|-----------|-----------|-------------------------|
|           |                | MAGEA4    | FGFR3     | Ki67      | MAGEA4    | SSX       | FGFR3     | n.s       | MAGEA4    | n.s       | n.s       | n.s       | n.s       | n.s       | MAGEA4    |                         |
| 1-2_C39   | Near Periphery | 0         |           | 0         | 1         | 0         | 0         |           | 1         |           |           |           |           |           | 0*        | 35                      |
|           |                |           |           |           | 3 cells   |           |           |           | 4 cells   |           |           |           |           |           | 2 cells   |                         |
| 55 µm     |                |           |           |           |           |           |           |           |           |           |           |           |           |           |           |                         |

**B**

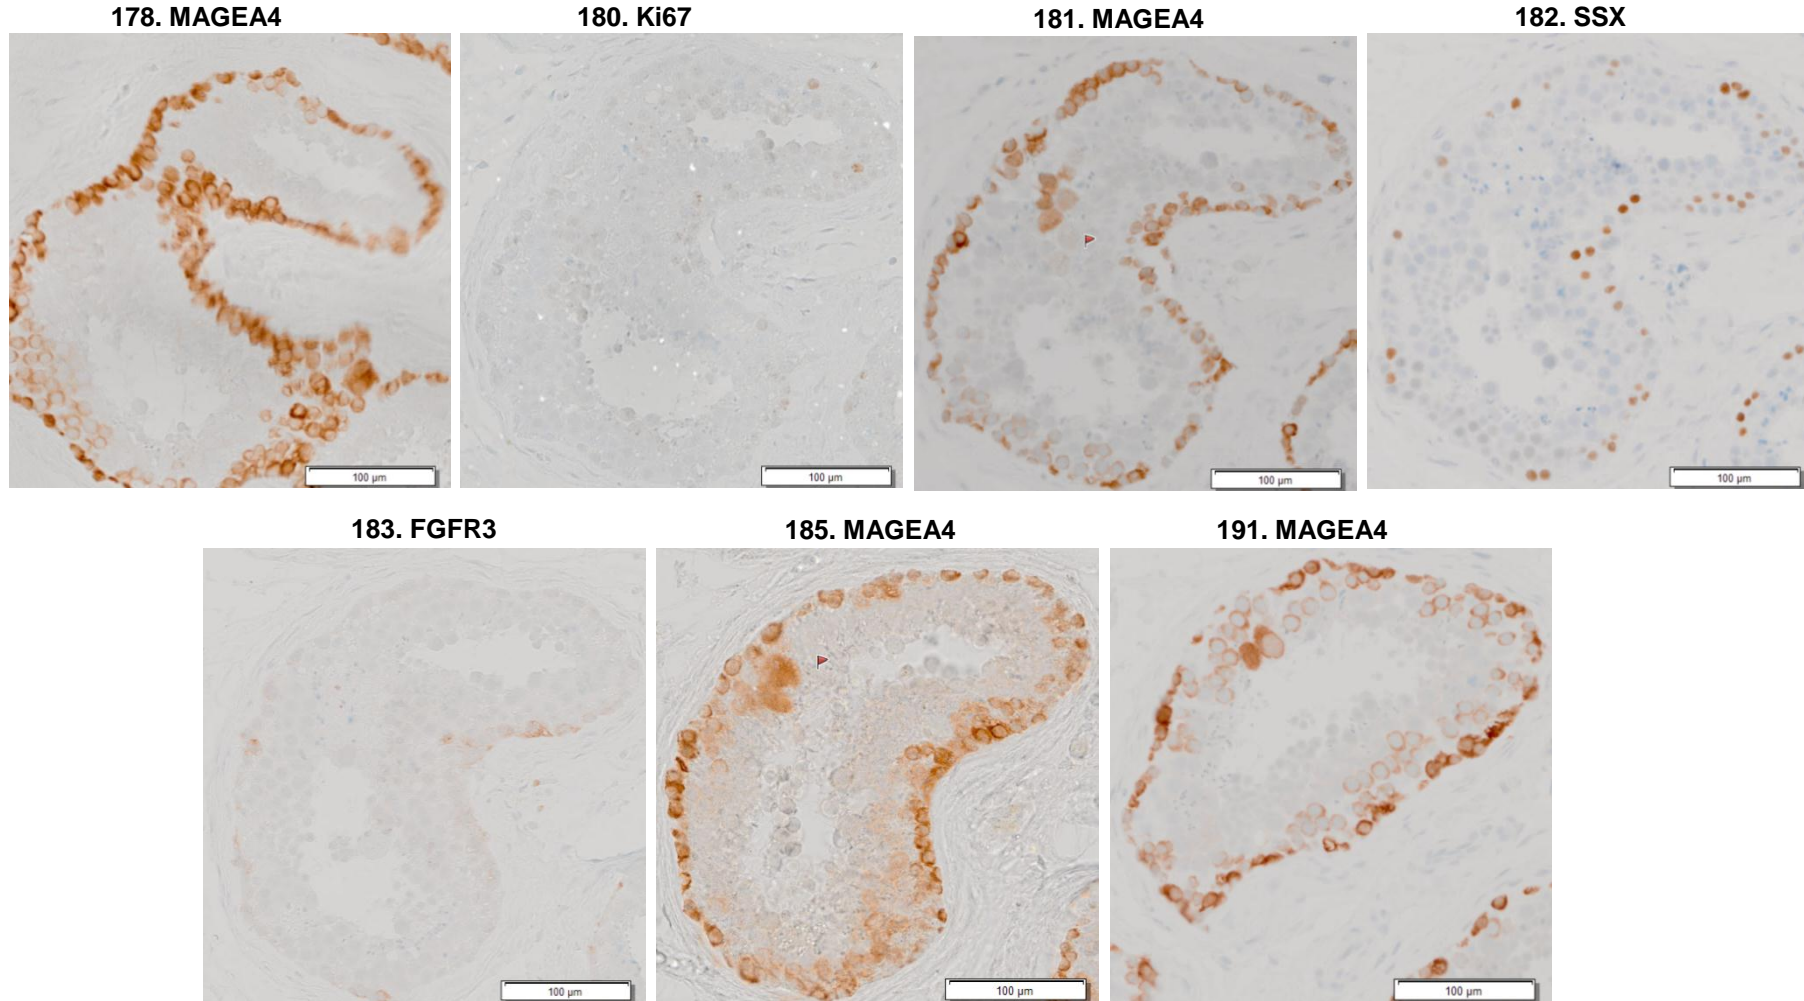

Supplement: pone.0042382.s006.pdf [file pone.0042382.s006.pdf]
